# Supplementary material for: Copper-catalyzed sulfonamidation of enol silyl ether via SO2 insertion towards the synthesis of β-keto sulfonamides
Source: Royal Society of Chemistry journal article supplement (doi:10.1039/d4qo00523f), 2024-01-01

## Supporting Information

### Copper-Catalyzed Sulfonamidation of Enol Silyl Ether via SO<sub>2</sub> Insertion towards the Synthesis of β-Keto Sulfonamides

Qinqiong Zeng,<sup>†a</sup> Yujia Gong,<sup>†a</sup> Xuemei Zhang,<sup>†\*a</sup> and Zhong Lian<sup>\*a</sup>

Department of Dermatology, State Key Laboratory of Biotherapy and cancer center, West China Hospital, Sichuan University, Chengdu 610041, China.

E-mail: lianzhong@scu.edu.cn; xuemeizhang@scu.edu.cn

<sup>†</sup>These authors contributed equally.

#### Table of Contents

|                                                                         |    |
|-------------------------------------------------------------------------|----|
| 1. General information.....                                             | 1  |
| 2. Optimization of the Reaction Condition.....                          | 2  |
| 3. General procedure for the synthesis of β-carbonylsulfonamide 3 ..... | 3  |
| 4. Characterization data of products 3 .....                            | 3  |
| 5. Unsuccessful silyl enol ethers.....                                  | 13 |
| 6. Scale-up reaction.....                                               | 13 |
| 7. Transformations of β-carbonylsulfonamide.....                        | 14 |
| 8. Mechanistic Studies .....                                            | 17 |
| 9. References.....                                                      | 20 |
| 10. NMR Spectra .....                                                   | 21 |

## 1. General information

Unless otherwise noted, all commercially available reagents were obtained from commercial suppliers and used without further purification. Unless otherwise noted, all catalytic reactions were carried out using standard techniques in an argon atmosphere glovebox (Vigor, SGI800-750TS-F). The substrates and reagents for catalytic reactions were degassed and stored in the glovebox, unless otherwise noted. All work-up and purification procedures were carried out with reagent-grade solvents in air.

Thin Layer Chromatography analysis was performed on silica gel coated glass plates (0.25 mm) with fluorescence indicator UV254. Column chromatography was conducted with silica gel (200-300 mesh) at room temperature and under elevated pressure.

$^1\text{H}$  NMR,  $^{19}\text{F}$  NMR and  $^{13}\text{C}$  NMR spectra were recorded at 400 MHz, 376 MHz and 100 MHz, respectively in  $\text{CDCl}_3$  using TMS as an internal reference with chemical shift values reported in ppm.  $^1\text{H}$  NMR was reported as follows: chemical shift, multiplicity (s, singlet; d, doublet; t, triplet; q, quartet; m, multiplet), coupling constant (J values) in Hz and integration. Chemical shifts ( $\delta$ ) were reported with respect to the corresponding solvent residual peak at 7.26 ppm for  $\text{CDCl}_3$  for  $^1\text{H}$  NMR.  $^{13}\text{C}$  NMR spectra were reported in ppm using the central peak of  $\text{CDCl}_3$  (77.16 ppm). High-resolution mass spectrometric measurements were provided by the Department of The State Key Laboratory of Biotherapy, Sichuan University. The molecular ion  $[\text{M}+\text{H}]^+$  and  $[\text{M}+\text{Na}]^+$  are given in m/z units.

## 2. Optimization of the Reaction Condition.

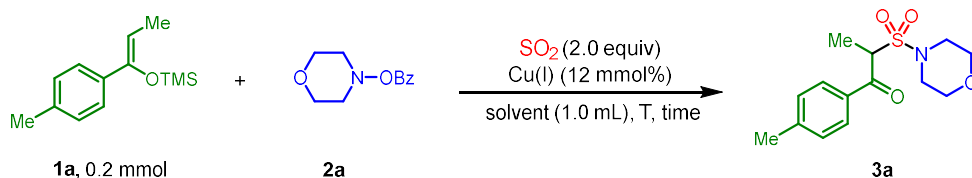

| Entry           | Cat.Cu                                    | T (°C)    | Solvent     | Time (h)  | SO <sub>2</sub> source                        | 3a Yield <sup>a</sup> (%) |
|-----------------|-------------------------------------------|-----------|-------------|-----------|-----------------------------------------------|---------------------------|
| 1               | -                                         | 60        | MeCN        | 12        | SOgen                                         | 0                         |
| 2               | Cu(OAc)                                   | 60        | MeCN        | 12        | SOgen                                         | 47                        |
| 3               | CuOTf                                     | 60        | MeCN        | 12        | SOgen                                         | 74                        |
| 4               | CuCl                                      | 60        | MeCN        | 12        | SOgen                                         | 29                        |
| 5               | CuBr                                      | 60        | MeCN        | 12        | SOgen                                         | 41                        |
| 6               | CuCN                                      | 60        | MeCN        | 12        | SOgen                                         | 60                        |
| 7               | Copper(I) thiophene-2-carboxylate         | 60        | MeCN        | 12        | SOgen                                         | 51                        |
| 8               | Cu(MeCN) <sub>4</sub> PF <sub>6</sub>     | 60        | MeCN        | 12        | SOgen                                         | 84                        |
| 9               | Cu(MeCN) <sub>4</sub> PF <sub>6</sub>     | 50        | MeCN        | 12        | SOgen                                         | 83                        |
| 10              | CuSO <sub>4</sub>                         | 30        | MeCN        | 12        | SOgen                                         | 1                         |
| 11              | Cu(OAc) <sub>2</sub>                      | 30        | MeCN        | 12        | SOgen                                         | 16                        |
| 12              | Cu(OTf) <sub>2</sub>                      | 30        | MeCN        | 12        | SOgen                                         | 58                        |
| 13              | CuCl <sub>2</sub>                         | 30        | MeCN        | 12        | SOgen                                         | 24                        |
| 14              | CuBr <sub>2</sub>                         | 30        | MeCN        | 12        | SOgen                                         | 15                        |
| 15              | CuF <sub>2</sub>                          | 30        | MeCN        | 12        | SOgen                                         | 7                         |
| 16              | Cu(MeCN) <sub>4</sub> PF <sub>6</sub>     | 40        | MeCN        | 12        | SOgen                                         | 91                        |
| <b>17</b>       | <b>Cu(MeCN)<sub>4</sub>PF<sub>6</sub></b> | <b>30</b> | <b>MeCN</b> | <b>12</b> | SOgen                                         | <b>91</b>                 |
| 18              | Cu(MeCN) <sub>4</sub> PF <sub>6</sub>     | 18        | MeCN        | 12        | SOgen                                         | 68                        |
| 19 <sup>b</sup> | Cu(MeCN) <sub>4</sub> PF <sub>6</sub>     | 30        | MeCN        | 12        | SOgen                                         | 8                         |
| 20 <sup>c</sup> | Cu(MeCN) <sub>4</sub> PF <sub>6</sub>     | 30        | MeCN        | 12        | SOgen                                         | 30                        |
| 21 <sup>d</sup> | Cu(MeCN) <sub>4</sub> PF <sub>6</sub>     | 30        | MeCN        | 12        | SOgen                                         | 84                        |
| 22              | Cu(MeCN) <sub>4</sub> PF <sub>6</sub>     | 30        | DMF         | 12        | SOgen                                         | 30                        |
| 23              | Cu(MeCN) <sub>4</sub> PF <sub>6</sub>     | 30        | EtOAc       | 12        | SOgen                                         | 12                        |
| 24              | Cu(MeCN) <sub>4</sub> PF <sub>6</sub>     | 30        | DCM         | 12        | SOgen                                         | 33                        |
| 25              | Cu(MeCN) <sub>4</sub> PF <sub>6</sub>     | 30        | Cyclohexane | 12        | SOgen                                         | trace                     |
| 26              | Cu(MeCN) <sub>4</sub> PF <sub>6</sub>     | 30        | Toluene     | 12        | SOgen                                         | 27                        |
| 27              | Cu(MeCN) <sub>4</sub> PF <sub>6</sub>     | 30        | THF         | 12        | SOgen                                         | 11                        |
| 28              | Cu(MeCN) <sub>4</sub> PF <sub>6</sub>     | 30        | 1,4-Dioxane | 12        | SOgen                                         | 8                         |
| 29              | Cu(MeCN) <sub>4</sub> PF <sub>6</sub>     | 30        | EtOH        | 12        | SOgen                                         | 20                        |
| 30              | Cu(MeCN) <sub>4</sub> PF <sub>6</sub>     | 30        | MeCN        | 1         | SOgen                                         | 48                        |
| 31              | Cu(MeCN) <sub>4</sub> PF <sub>6</sub>     | 30        | MeCN        | 3         | SOgen                                         | 75                        |
| 32              | Cu(MeCN) <sub>4</sub> PF <sub>6</sub>     | 30        | MeCN        | 6         | SOgen                                         | 85                        |
| 33 <sup>e</sup> | Cu(MeCN) <sub>4</sub> PF <sub>6</sub>     | 30        | MeCN        | 12        | DABSO                                         | 6                         |
| 34 <sup>e</sup> | Cu(MeCN) <sub>4</sub> PF <sub>6</sub>     | 30        | MeCN        | 12        | Na <sub>2</sub> S <sub>2</sub> O <sub>5</sub> | 3                         |
| 35 <sup>e</sup> | Cu(MeCN) <sub>4</sub> PF <sub>6</sub>     | 30        | MeCN        | 12        | K <sub>2</sub> S <sub>2</sub> O <sub>5</sub>  | 3                         |
| 36 <sup>e</sup> | Cu(MeCN) <sub>4</sub> PF <sub>6</sub>     | 30        | MeCN        | 12        | TsCl                                          | N.D.                      |

<sup>a</sup>Yield was determined by GC of the crude mixture using *n*-hexadecane as an internal standard.

<sup>b</sup>3 mol% of the catalyst was used. <sup>c</sup>6 mol % of the catalyst was used. <sup>d</sup>9 mol% of the catalyst was used. <sup>e</sup>The reaction was set up in a 4 mL vial.

### 3. General procedure for the synthesis of $\beta$ -carbonylsulfonamide **3**

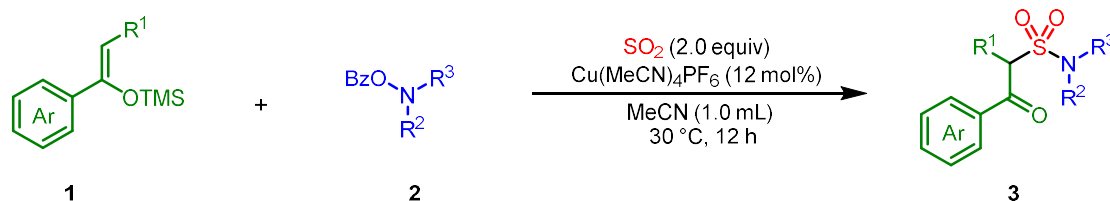

In the glovebox, compound **1** (0.2 mmol, 1.0 equiv.), compound **2** (0.6 mmol, 3.0 equiv.),  $\text{Cu}(\text{MeCN})_4\text{PF}_6$  (9.0 mg, 12.0 mol%) were added into chamber B with a magnetic stirring bar, followed by addition of MeCN (1.0 mL). Tetrabromothiophene S,S-dioxides (172.7 mg, 2.0 equiv.), 4-methylphenylene (64  $\mu\text{L}$ , 2.4 equiv.) was added to chamber B with a magnetic stirring bar, followed by addition of tetradecane (1.0 mL). The two chamber system was sealed and removed out of the glovebox. The chamber A was allowed to stir at 100 °C using heating mantle with 600-800 rpm stirring speed for 10 min. Then chamber B was heated to 30 °C in heat block. After 12 hours, two chamber was cooled to room temperature. Upon completion, the reaction mixture was purified by silica gel column chromatography using petroleum ether/ethyl acetate as eluent to afford pure products **3**.

### 4. Characterization data of products **3**

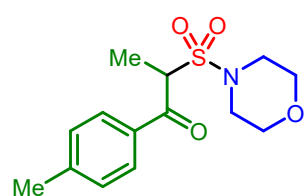

#### 2-(morpholinosulfonyl)-1-(p-tolyl)propan-1-one (**3a**)

Prepared by the general procedure, isolated as white solid using petroleum ether/ethyl acetate (5:1) as eluent (55.3 mg, 93%).  $^1\text{H}$  NMR (400 MHz, Chloroform-*d*)  $\delta$  7.92 (d,  $J$  = 8.3 Hz, 2H), 7.30 (d,  $J$  = 8.0 Hz, 2H), 5.12 (q,  $J$  = 6.9 Hz, 1H), 3.69 – 3.59 (m, 4H), 3.40 – 3.27 (m, 4H), 2.43 (s, 3H), 1.65 (d,  $J$  = 6.9 Hz, 3H).  $^{13}\text{C}$  NMR (100 MHz, Chloroform-*d*)  $\delta$  192.8, 145.6, 133.6, 129.8, 129.4, 67.1, 63.0, 47.2, 21.9, 13.6. HRMS (ESI/Q-TOF)  $m/z$ :  $[\text{M}+\text{Na}]^+$  calcd for  $\text{C}_{14}\text{H}_{19}\text{NNaO}_4\text{S}$  320.0927; found: 320.0926.

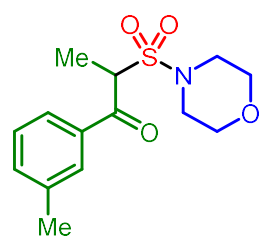

#### 2-(morpholinosulfonyl)-1-(m-tolyl)propan-1-one (**3b**)

Prepared by the general procedure, isolated as colourless oil using petroleum ether/ethyl acetate (7:1) as eluent (51.7 mg, 87%).  $^1\text{H}$  NMR (400 MHz, Chloroform-*d*)  $\delta$  7.85 – 7.73 (m, 2H), 7.47 – 7.37 (m, 2H), 5.14 (q,  $J$  = 6.9 Hz, 1H), 3.71 – 3.60 (m, 4H), 3.42 – 3.29 (m, 4H), 2.43 (s, 3H), 1.66 (d,  $J$  = 6.9 Hz, 3H).  $^{13}\text{C}$  NMR (100 MHz, Chloroform-*d*)  $\delta$  193.6, 139.0, 136.2, 135.2, 129.6, 128.9, 126.5, 67.1, 63.0, 47.2, 21.5, 13.7. HRMS (ESI/Q-TOF)  $m/z$ :  $[\text{M}+\text{Na}]^+$  calcd for  $\text{C}_{14}\text{H}_{19}\text{NNaO}_4\text{S}$  320.0927; found: 320.0926.

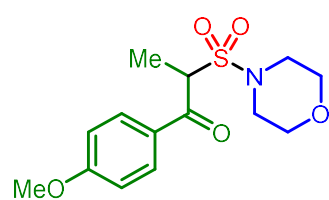

#### 1-(4-methoxyphenyl)-2-(morpholinosulfonyl)propan-1-one (**3c**)

Prepared by the general procedure, isolated as white solid using petroleum ether/ethyl acetate (3:1) as eluent (58.9 mg, 94%).  $^1\text{H}$  NMR (400 MHz, Chloroform-*d*)  $\delta$  7.99 (d,  $J$  = 8.9 Hz, 2H), 6.96 (d,  $J$  = 8.9 Hz, 2H), 5.08 (q,  $J$  = 6.9 Hz, 1H), 3.87 (s,

3H), 3.72 – 3.56 (m, 4H), 3.44 – 3.24 (m,  $J = 4.5$  Hz, 4H), 1.63 (d,  $J = 6.9$  Hz, 3H).  $^{13}\text{C}$  NMR (100 MHz, Chloroform-*d*)  $\delta$  191.2, 164.4, 131.5, 128.8, 114.0, 66.8, 62.5, 55.5, 47.0, 13.4. HRMS (ESI/Q-TOF)  $m/z$ :  $[\text{M}+\text{Na}]^+$  calcd for  $\text{C}_{14}\text{H}_{19}\text{NNaO}_5\text{S}$  336.0876; found: 336.0881.

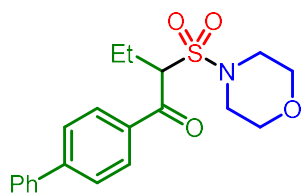

#### 1-([1,1'-biphenyl]-4-yl)-2-(morpholinosulfonyl)butan-1-one (3d)

Prepared by the general procedure, isolated as white solid using petroleum ether/ethyl acetate (5:1) as eluent (59.8 mg, 80%).  $^1\text{H}$  NMR (400 MHz, Chloroform-*d*)  $\delta$  8.14 – 8.08 (m, 2H), 7.77 – 7.71 (m, 2H), 7.66 – 7.61 (m, 2H), 7.52 – 7.45 (m, 2H), 7.45 – 7.39 (m, 1H), 5.03 (dd,  $J = 10.8, 3.7$  Hz, 1H), 3.71 – 3.60 (m, 4H), 3.42 – 3.28 (m, 4H), 2.45 – 2.31 (m, 1H), 2.26 – 2.14 (m, 1H), 0.95 (t,  $J = 7.4$  Hz, 3H).  $^{13}\text{C}$  NMR (100 MHz, Chloroform-*d*)  $\delta$  192.9, 147.0, 139.6, 135.9, 129.7, 129.2, 128.7, 127.7, 127.4, 69.7, 67.1, 47.2, 22.3, 11.8. HRMS (ESI/Q-TOF)  $m/z$ :  $[\text{M}+\text{H}]^+$  calcd for  $\text{C}_{20}\text{H}_{24}\text{NO}_4\text{S}$  374.1421; found: 374.1412.

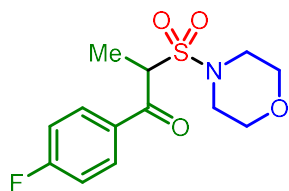

#### 1-(4-fluorophenyl)-2-(morpholinosulfonyl)propan-1-one (3e)

Prepared by the general procedure, isolated as white solid using petroleum ether/ethyl acetate (4:1) as eluent (56.7 mg, 94%).  $^1\text{H}$  NMR (400 MHz, Chloroform-*d*)  $\delta$  8.10 – 8.02 (m, 2H), 7.17 (t,  $J = 8.5$  Hz, 2H), 5.09 (q,  $J = 6.9$  Hz, 1H), 3.70 – 3.59 (m, 4H), 3.41 – 3.27 (m, 4H), 1.64 (d,  $J = 6.9$  Hz, 3H).  $^{19}\text{F}$  NMR (376 MHz, Chloroform-*d*)  $\delta$  -102.82(s, 1F).  $^{13}\text{C}$  NMR (100 MHz, Chloroform-*d*)  $\delta$  191.8, 166.4 (d,  $J = 258.4$  Hz), 132.5 (d,  $J = 2.9$  Hz), 132.1 (d,  $J = 9.7$  Hz), 116.2 (d,  $J = 22.1$  Hz), 67.0, 63.1, 47.2, 13.5. HRMS (ESI/Q-TOF)  $m/z$ :  $[\text{M}+\text{Na}]^+$  calcd for  $\text{C}_{13}\text{H}_{16}\text{FNNaO}_4\text{S}$  324.0676; found: 324.0672.

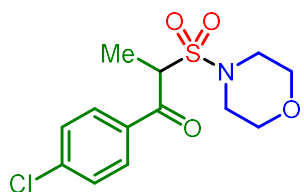

#### 1-(4-chlorophenyl)-2-(morpholinosulfonyl)propan-1-one (3f)

Prepared by the general procedure, isolated as white solid using petroleum ether/ethyl acetate (4:1) as eluent (56.6 mg, 89%).  $^1\text{H}$  NMR (400 MHz, Chloroform-*d*)  $\delta$  7.96 (d,  $J = 8.6$  Hz, 2H), 7.47 (d,  $J = 8.6$  Hz, 2H), 5.08 (q,  $J = 6.9$  Hz, 1H), 3.72 – 3.60 (m, 4H), 3.40 – 3.27 (m, 4H), 1.65 (d,  $J = 6.9$  Hz, 3H).  $^{13}\text{C}$  NMR (100 MHz, Chloroform-*d*)  $\delta$  192.2, 141.0, 134.4, 130.7, 129.3, 67.0, 63.2, 47.3, 13.5. HRMS (ESI/Q-TOF)  $m/z$ :  $[\text{M}+\text{Na}]^+$  calcd for  $\text{C}_{13}\text{H}_{16}\text{ClNNaO}_4\text{S}$  340.0381; found: 340.0377.

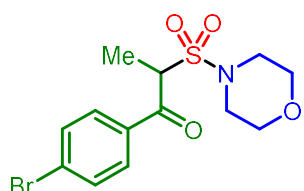

#### 1-(4-bromophenyl)-2-(morpholinosulfonyl)propan-1-one (3g)

Prepared by the general procedure, isolated as white solid using petroleum ether/ethyl acetate (4:1) as eluent (68.2 mg, 94%).  $^1\text{H}$  NMR (400 MHz, Chloroform-*d*)  $\delta$  7.91 – 7.85 (m, 2H), 7.67 – 7.61 (m, 2H), 5.07 (q,  $J = 6.9$  Hz, 1H), 3.69 – 3.60 (m, 4H), 3.39 – 3.26 (m, 4H), 1.63 (d,  $J = 6.9$  Hz, 3H).  $^{13}\text{C}$  NMR (100 MHz, Chloroform-*d*)  $\delta$  192.4, 134.8, 132.3, 130.7, 129.8, 67.0, 63.1, 47.2, 13.4. HRMS (ESI/Q-TOF)  $m/z$ :  $[\text{M}+\text{H}]^+$  calcd for  $\text{C}_{13}\text{H}_{17}\text{BrNO}_4\text{S}$  362.0056; found: 362.0053.

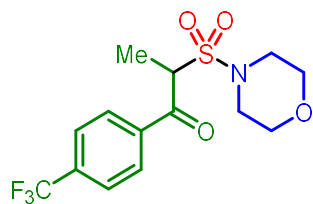

**2-(morpholinosulfonyl)-1-(4-(trifluoromethyl)phenyl)propan-1-one (3h)**

Prepared by the general procedure, Cu(MeCN)<sub>4</sub>PF<sub>6</sub> (15 mg, 20.0 mol%) instead of Cu(MeCN)<sub>4</sub>PF<sub>6</sub> (9 mg, 12.0 mol%), isolated as white solid using petroleum ether/ethyl acetate (5:1) as eluent (42.9 mg, 61%). <sup>1</sup>H NMR (400 MHz, Chloroform-*d*) δ 8.14 (d, *J* = 8.2 Hz, 2H), 7.77 (d, *J* = 8.3 Hz, 2H), 5.13 (q, *J* = 6.9 Hz, 1H), 3.73 – 3.62 (m, 4H), 3.43 – 3.29 (m, 4H), 1.67 (d, *J* = 6.9 Hz, 3H). <sup>19</sup>F NMR (376 MHz, Chloroform-*d*) δ -63.29(s, 3F). <sup>13</sup>C NMR (100 MHz, Chloroform-*d*) δ 192.8, 138.8, 135.4 (q, *J* = 33.0 Hz), 129.7, 126.1 (q, *J* = 3.7 Hz), 123.5 (q, *J* = 273.9 Hz), 67.1, 63.6, 47.4, 13.4. HRMS (ESI/Q-TOF) *m/z*: [M+Na]<sup>+</sup> calcd for C<sub>14</sub>H<sub>16</sub>F<sub>3</sub>NNaO<sub>4</sub>S 374.0644; found: 374.0645.

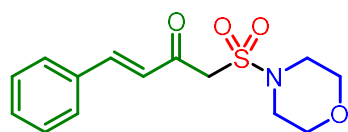

**(E)-1-(morpholinosulfonyl)-4-phenylbut-3-en-2-one (3i)**

Prepared by the general procedure, isolated as white solid using petroleum ether/ethyl acetate (2:1) as eluent (36.6 mg, 62%). <sup>1</sup>H NMR (400 MHz, Chloroform-*d*) δ 7.71 (d, *J* = 16.0 Hz, 1H), 7.60 (dd, *J* = 7.6, 1.7 Hz, 2H), 7.49 – 7.36 (m, 3H), 6.98 (d, *J* = 16.0 Hz, 1H), 4.25 (s, 2H), 3.76 – 3.70 (m, 4H), 3.38 – 3.31 (m, 4H). <sup>13</sup>C NMR (100 MHz, Chloroform-*d*) δ 188.0, 146.6, 133.6, 131.4, 129.0, 128.9, 124.8, 66.4, 59.6, 46.1. HRMS (ESI/Q-TOF) *m/z*: [M+Na]<sup>+</sup> calcd for C<sub>14</sub>H<sub>17</sub>NNaO<sub>4</sub>S 318.0770; found: 318.0772.

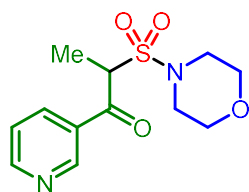

**2-(morpholinosulfonyl)-1-(pyridin-3-yl)propan-1-one (3j)**

Prepared by the general procedure, isolated as white solid using petroleum ether/ethyl acetate (1:1) as eluent (28.4mg, 50%). <sup>1</sup>H NMR (400 MHz, Chloroform-*d*) δ 9.22 (s, 1H), 8.81 (s, 1H), 8.35 – 8.23 (m, 1H), 7.50 – 7.42 (m, 1H), 5.09 (q, *J* = 6.9 Hz, 1H), 3.71 – 3.60 (m, 4H), 3.42 – 3.27 (m, *J* = 4.7 Hz, 4H), 1.66 (d, *J* = 6.9 Hz, 3H). <sup>13</sup>C NMR (100 MHz, Chloroform-*d*) δ 192.6, 154.4, 150.5, 136.6, 131.5, 123.8, 67.1, 63.5, 47.3, 13.2. HRMS (ESI/Q-TOF) *m/z*: [M+Na]<sup>+</sup> calcd for C<sub>12</sub>H<sub>16</sub>N<sub>2</sub>NaO<sub>4</sub>S 307.0723; found: 307.0730.

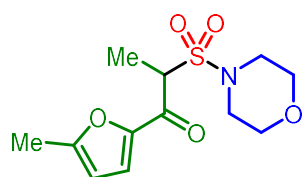

**1-(5-methylfuran-2-yl)-2-(morpholinosulfonyl)propan-1-one (3k)**

Prepared by the general procedure, isolated as white solid using petroleum ether/ethyl acetate (4:1) as eluent (51.8 mg, 90%). <sup>1</sup>H NMR (400 MHz, Chloroform-*d*) δ 7.28 (d, *J* = 3.5 Hz, 1H), 6.24 (d, *J* = 3.4 Hz, 1H), 4.82 (q, *J* = 6.8 Hz, 1H), 3.69 – 3.59 (m, 4H), 3.41 – 3.26 (m, 4H), 2.41 (s, 3H), 1.61 (d, *J* = 7.0 Hz, 3H). <sup>13</sup>C NMR (100 MHz, Chloroform-*d*) δ 179.1, 158.9, 149.7, 121.4, 109.3, 66.0, 62.4, 46.1, 13.3 (d, *J* = 2.0 Hz), 12.0. HRMS (ESI/Q-TOF) *m/z*: [M+Na]<sup>+</sup> calcd for C<sub>12</sub>H<sub>17</sub>NNaO<sub>5</sub>S 310.0720; found: 310.0714.

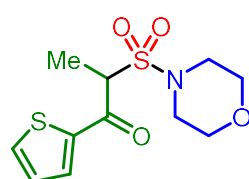

**2-(morpholinosulfonyl)-1-(thiophen-2-yl)propan-1-one (3l)**

Prepared by the general procedure, isolated as colourless oil using petroleum ether/ethyl acetate (5:1) as eluent (28.3 mg, 49%). <sup>1</sup>H NMR (400 MHz, Chloroform-*d*) δ 7.87 (d, *J* = 3.9 Hz, 1H), 7.76 (d, *J* = 4.9 Hz, 1H), 7.23 – 7.16 (m, 1H), 4.89 (q, *J* = 7.0 Hz, 1H), 3.70 – 3.60 (m, 4H), 3.41 – 3.28 (m, 4H), 1.67 (d, *J* = 7.0 Hz, 3H). <sup>13</sup>C NMR (100 MHz, Chloroform-*d*) δ 185.5,

143.4, 136.3, 134.6, 128.9, 67.0, 65.0, 47.2, 13.5. HRMS (ESI/Q-TOF)  $m/z$ :  $[M+Na]^+$  calcd for  $C_{11}H_{15}NNaO_4S_2$  312.0335; found: 312.0337.

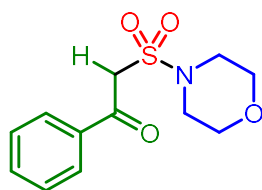

### 2-(morpholinosulfonyl)-1-phenylethan-1-one (3m)

Prepared by the general procedure, isolated as white solid using petroleum ether/ethyl acetate (5:1) as eluent (32.8 mg, 61%).  $^1H$  NMR (400 MHz, Chloroform-*d*)  $\delta$  8.03 (d,  $J = 7.5$  Hz, 2H), 7.64 (t,  $J = 7.4$  Hz, 1H), 7.52 (t,  $J = 7.7$  Hz, 2H), 4.57 (s, 2H), 3.76 – 3.69 (m, 4H), 3.40 – 3.30 (m, 4H).  $^{13}C$  NMR (100 MHz, Chloroform-*d*)  $\delta$  189.2, 135.8, 134.6, 129.5, 129.1, 66.7, 57.3, 46.3. HRMS (ESI/Q-TOF)  $m/z$ :  $[M+Na]^+$  calcd for  $C_{12}H_{15}NNaO_4S$  292.0614; found: 292.0612.

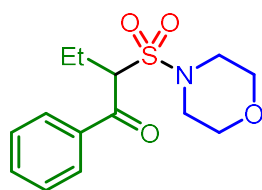

### 2-(morpholinosulfonyl)-1-phenylbutan-1-one (3n)

Prepared by the general procedure, isolated as white solid using petroleum ether/ethyl acetate (6:1) as eluent (50.6 mg, 85%).  $^1H$  NMR (400 MHz, Chloroform-*d*)  $\delta$  8.02 (d,  $J = 7.4$  Hz, 2H), 7.63 (t,  $J = 7.4$  Hz, 1H), 7.52 (t,  $J = 7.7$  Hz, 2H), 4.98 (dd,  $J = 10.8, 3.7$  Hz, 1H), 3.68 – 3.56 (m, 4H), 3.39 – 3.25 (m, 4H), 2.42 – 2.27 (m, 1H), 2.23 – 2.13 (m, 1H), 0.92 (t,  $J = 7.4$  Hz, 3H).  $^{13}C$  NMR (100 MHz, Chloroform-*d*)  $\delta$  193.5, 137.3, 134.3, 129.1, 129.0, 69.6, 67.0, 47.1, 22.3, 11.8. HRMS (ESI/Q-TOF)  $m/z$ :  $[M+Na]^+$  calcd for  $C_{14}H_{19}NNaO_4S$  320.0927; found: 320.0923.

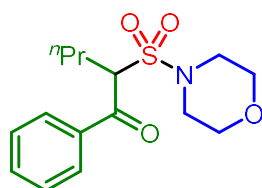

### 2-(morpholinosulfonyl)-1-phenylpentan-1-one (3o)

Prepared by the general procedure, isolated as white solid using petroleum ether/ethyl acetate (7:1) as eluent (50.4 mg, 81%).  $^1H$  NMR (400 MHz, Chloroform-*d*)  $\delta$  8.01 (d,  $J = 7.4$  Hz, 2H), 7.63 (t,  $J = 7.4$  Hz, 1H), 7.51 (t,  $J = 7.7$  Hz, 2H), 5.06 (dd,  $J = 10.9, 3.4$  Hz, 1H), 3.68 – 3.58 (m, 4H), 3.39 – 3.25 (m, 4H), 2.39 – 2.26 (m, 1H), 2.13 – 2.02 (m, 1H), 1.35 – 1.22 (m, 2H), 0.90 (t,  $J = 7.3$  Hz, 3H).  $^{13}C$  NMR (100 MHz, Chloroform-*d*)  $\delta$  193.5, 137.1, 134.3, 129.1, 129.0, 68.0, 67.0, 47.2, 30.6, 20.6, 14.0. HRMS (ESI/Q-TOF)  $m/z$ :  $[M+Na]^+$  calcd for  $C_{15}H_{21}NNaO_4S$  334.1083; found: 334.1084.

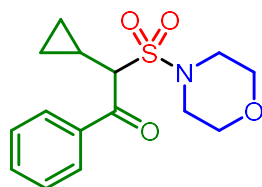

### 2-cyclopropyl-2-(morpholinosulfonyl)-1-phenylethan-1-one (3p)

Prepared by the general procedure, isolated as white solid using petroleum ether/ethyl acetate (5:1) as eluent (30.9 mg, 50%).  $^1H$  NMR (400 MHz, Chloroform-*d*)  $\delta$  7.98 – 7.92 (m, 2H), 7.66 – 7.59 (m, 1H), 7.54 – 7.46 (m, 2H), 4.26 (d,  $J = 10.1$  Hz, 1H), 3.76 – 3.63 (m, 4H), 3.56 – 3.37 (m, 4H), 1.66 – 1.54 (m, 1H), 0.91 – 0.77 (m, 2H), 0.74 – 0.62 (m, 1H), 0.32 – 0.20 (m, 1H).  $^{13}C$  NMR (100 MHz, Chloroform-*d*)  $\delta$  193.6, 136.6, 134.2, 129.0, 72.8, 67.2, 47.12, 9.9, 5.2, 4.7. HRMS (ESI/Q-TOF)  $m/z$ :  $[M+Na]^+$  calcd for  $C_{15}H_{19}NNaO_4S$  332.0927; found: 332.0925.

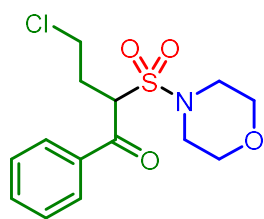

#### 4-chloro-2-(morpholinosulfonyl)-1-phenylbutan-1-one (3q)

Prepared by the general procedure,  $\text{Cu}(\text{MeCN})_4\text{PF}_6$  (15 mg, 20.0 mol%) instead of  $\text{Cu}(\text{MeCN})_4\text{PF}_6$  (9 mg, 12.0 mol%), isolated as white solid using petroleum ether/ethyl acetate (5:1) as eluent (54.4 mg, 82%).  $^1\text{H}$  NMR (400 MHz, Chloroform-*d*)  $\delta$  8.05 (d,  $J = 7.4$  Hz, 2H), 7.66 (t,  $J = 7.4$  Hz, 1H), 7.54 (t,  $J = 7.7$  Hz, 2H), 5.41 (dd,  $J = 9.9, 3.9$  Hz, 1H), 3.79 – 3.67 (m, 1H), 3.63 – 3.54 (m, 4H), 3.45 – 3.35 (m, 1H), 3.33 – 3.21 (m, 4H), 2.86 – 2.75 (m, 1H), 2.61 – 2.50 (m, 1H).  $^{13}\text{C}$  NMR (100 MHz, Chloroform-*d*)  $\delta$  192.3, 136.7, 134.6, 129.2, 129.2, 66.9, 64.8, 47.0, 41.8, 31.1. HRMS (ESI/Q-TOF)  $m/z$ :  $[\text{M}+\text{Na}]^+$  calcd for  $\text{C}_{14}\text{H}_{18}\text{ClNNaO}_4\text{S}$  354.0537; found: 354.0542.

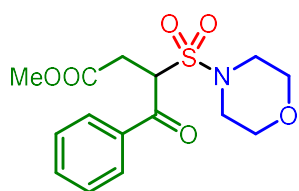

#### methyl 3-(morpholinosulfonyl)-4-oxo-4-phenylbutanoate (3r)

Prepared by the general procedure,  $\text{Cu}(\text{MeCN})_4\text{PF}_6$  (15 mg, 20.0 mol%) instead of  $\text{Cu}(\text{MeCN})_4\text{PF}_6$  (9 mg, 12.0 mol%), isolated as white solid using petroleum ether/ethyl acetate (2:1) as eluent (49.8 mg, 73%).  $^1\text{H}$  NMR (400 MHz, Chloroform-*d*)  $\delta$  8.11 – 8.03 (m, 2H), 7.67 – 7.61 (m, 1H), 7.57 – 7.49 (m, 2H), 5.50 (dd,  $J = 10.9, 3.6$  Hz, 1H), 3.64 (s, 3H), 3.61 – 3.56 (m, 4H), 3.48 (dd,  $J = 17.2, 10.9$  Hz, 1H), 3.28 – 3.20 (m, 4H), 3.14 (dd,  $J = 17.2, 3.5$  Hz, 1H).  $^{13}\text{C}$  NMR (100 MHz, Chloroform-*d*)  $\delta$  192.1, 170.5, 136.5, 134.4, 129.3, 129.0, 66.8, 63.6, 52.6, 46.9, 33.1. HRMS (ESI/Q-TOF)  $m/z$ :  $[\text{M}+\text{Na}]^+$  calcd for  $\text{C}_{15}\text{H}_{19}\text{NNaO}_6\text{S}$  364.0825; found: 364.0826.

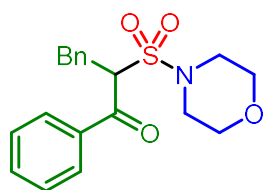

#### 2-(morpholinosulfonyl)-1,3-diphenylpropan-1-one (3s)

Prepared by the general procedure,  $\text{Cu}(\text{MeCN})_4\text{PF}_6$  (15 mg, 20.0 mol%) instead of  $\text{Cu}(\text{MeCN})_4\text{PF}_6$  (9 mg, 12.0 mol%), isolated as white solid using petroleum ether/ethyl acetate (4:1) as eluent (44.6 mg, 62%).  $^1\text{H}$  NMR (400 MHz, Chloroform-*d*)  $\delta$  7.83 – 7.75 (m, 2H), 7.57 – 7.50 (m, 1H), 7.43 – 7.37 (m, 2H), 7.23 – 7.10 (m, 5H), 5.29 (dd,  $J = 11.5, 3.1$  Hz, 1H), 3.69 – 3.58 (m, 5H), 3.45 (dd,  $J = 13.1, 3.0$  Hz, 1H), 3.42 – 3.28 (m, 4H).  $^{13}\text{C}$  NMR (100 MHz, Chloroform-*d*)  $\delta$  193.0, 137.2, 136.2, 134.2, 129.0, 129.0, 128.9, 128.8, 127.3, 69.4, 67.0, 47.2, 34.5. HRMS (ESI/Q-TOF)  $m/z$ :  $[\text{M}+\text{Na}]^+$  calcd for  $\text{C}_{19}\text{H}_{21}\text{NNaO}_4\text{S}$  382.1083; found: 382.1082.

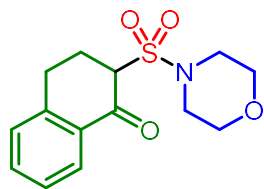

#### 2-(morpholinosulfonyl)-3,4-dihydronaphthalen-1(2H)-one (3t)

Prepared by the general procedure, isolated as white solid using petroleum ether/ethyl acetate (4:1) as eluent (54.4 mg, 92%).  $^1\text{H}$  NMR (400 MHz, Chloroform-*d*)  $\delta$  8.07 – 8.01 (m, 1H), 7.56 – 7.49 (m, 1H), 7.33 (t,  $J = 7.6$  Hz, 1H), 7.27 (d,  $J = 8.2$  Hz, 1H), 4.03 (t,  $J = 5.0$  Hz, 1H), 3.79 – 3.68 (m, 4H), 3.54 – 3.33 (m, 5H), 2.98 – 2.88 (m, 1H), 2.82 – 2.72 (m, 1H), 2.62 – 2.52 (m, 1H).  $^{13}\text{C}$  NMR (100 MHz, Chloroform-*d*)  $\delta$  190.0, 144.0, 134.7, 131.8, 129.2, 128.1, 127.2, 67.0, 65.8, 46.5, 26.3, 25.6. HRMS (ESI/Q-TOF)  $m/z$ :  $[\text{M}+\text{Na}]^+$  calcd for  $\text{C}_{14}\text{H}_{17}\text{NNaO}_4\text{S}$  318.0770; found: 318.0773.



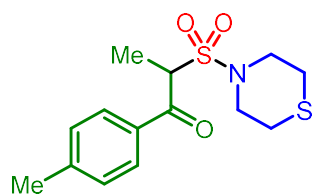

### 2-(thiomorpholinosulfonyl)-1-(p-tolyl)propan-1-one (3u)

Prepared by the general procedure, isolated as white solid using petroleum ether/ethyl acetate (15:1) as eluent (62.1 mg, 99%). <sup>1</sup>H NMR (400 MHz, Chloroform-*d*) δ 7.91 (d, *J* = 8.3 Hz, 2H), 7.30 (d, *J* = 8.1 Hz, 2H), 5.09 (q, *J* = 6.9 Hz, 1H), 3.67 – 3.43 (m, 4H), 2.68 – 2.53 (m, 4H), 2.43 (s, 3H), 1.62 (d, *J* = 6.9 Hz, 3H). <sup>13</sup>C NMR (100 MHz, Chloroform-*d*) δ 192.5, 145.4, 133.4, 129.6, 129.2, 62.8, 49.0, 27.8, 21.7, 13.3. HRMS (ESI/Q-TOF) *m/z*: [M+Na]<sup>+</sup> calcd for C<sub>14</sub>H<sub>19</sub>NNaO<sub>3</sub>S<sub>2</sub> 336.0699; found: 336.0697.

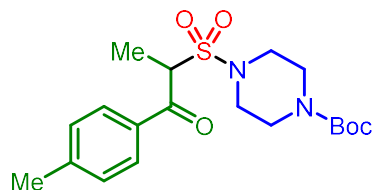

### tert-butyl 4-((1-oxo-1-(p-tolyl)propan-2-yl)sulfonyl)piperazine-1-carboxylate (3v)

Prepared by the general procedure, isolated as white solid using petroleum ether/ethyl acetate (5:1) as eluent (77.8 mg, 98%). <sup>1</sup>H NMR (400 MHz, Chloroform-*d*) δ 7.90 (d, *J* = 8.0 Hz, 2H), 7.29 (d, *J* = 8.0 Hz, 2H), 5.11 (q, *J* = 6.9 Hz, 1H), 3.45-3.33 (m, 4H), 3.33-3.19 (m, 4H), 2.41 (s, 3H), 1.62 (d, *J* = 6.9 Hz, 3H), 1.43 (s, 9H). <sup>13</sup>C NMR (100 MHz, Chloroform-*d*) δ 192.6, 154.2, 145.4, 133.4, 129.5, 129.2, 80.2, 62.8, 46.7, 43.9, 28.2, 21.6, 13.4. HRMS (ESI/Q-TOF) *m/z*: [M+Na]<sup>+</sup> calcd for C<sub>19</sub>H<sub>28</sub>N<sub>2</sub>NaO<sub>5</sub>S 419.1611; found: 419.1612.

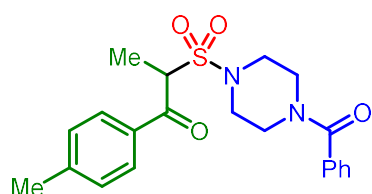

### 2-((4-benzoylpiperazin-1-yl)sulfonyl)-1-(p-tolyl)propan-1-one (3w)

Prepared by the general procedure, Cu(MeCN)<sub>4</sub>PF<sub>6</sub> (15 mg, 20.0 mol%) instead of Cu(MeCN)<sub>4</sub>PF<sub>6</sub> (9 mg, 12.0 mol%), isolated as white solid using petroleum ether/ethyl acetate (5:1) as eluent (63.3 mg, 79%). <sup>1</sup>H NMR (400 MHz, Chloroform-*d*) δ 7.90 (d, *J* = 8.3 Hz, 2H), 7.46 – 7.33 (m, 5H), 7.30 (d, *J* = 8.1 Hz, 2H), 5.13 (q, *J* = 6.9 Hz, 1H), 3.73 (s, 2H), 3.39 (s, 6H), 2.42 (s, 3H), 1.64 (d, *J* = 6.9 Hz, 3H). <sup>13</sup>C NMR (100 MHz, Chloroform-*d*) δ 192.8, 170.6, 145.7, 135.1, 133.5, 130.2, 129.8, 129.4, 128.7, 127.1, 63.1, 48.2, 47.1, 42.7, 21.9, 21.8, 13.6. HRMS (ESI/Q-TOF) *m/z*: [M+Na]<sup>+</sup> calcd for C<sub>21</sub>H<sub>24</sub>N<sub>2</sub>NaO<sub>4</sub>S 423.1349; found: 423.1357.

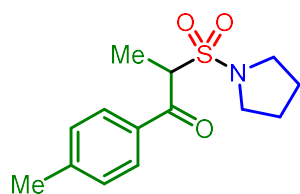

### 2-(pyrrolidin-1-ylsulfonyl)-1-(p-tolyl)propan-1-one (3x)

Prepared by the general procedure, isolated as white solid using petroleum ether/ethyl acetate (6:1) as eluent (38.8 mg, 69%). <sup>1</sup>H NMR (400 MHz, Chloroform-*d*) δ 7.93 (d, *J* = 8.3 Hz, 2H), 7.29 (d, *J* = 8.1 Hz, 2H), 5.12 (q, *J* = 6.9 Hz, 1H), 3.44 – 3.27 (m, 4H), 2.42 (s, 3H), 1.87 – 1.75 (m, 4H), 1.67 (d, *J* = 6.9 Hz, 3H). <sup>13</sup>C NMR (100 MHz, Chloroform-*d*) δ 193.0, 145.0, 133.8, 129.5, 129.2, 62.9, 48.8, 25.8, 21.7, 13.5. HRMS (ESI/Q-TOF) *m/z*: [M+Na]<sup>+</sup> calcd for C<sub>14</sub>H<sub>19</sub>NNaO<sub>3</sub>S 304.0978; found: 304.0976.

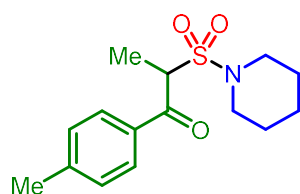

### 2-(piperidin-1-ylsulfonyl)-1-(p-tolyl)propan-1-one (3y)

Prepared by the general procedure, isolated as white solid using petroleum ether/ethyl acetate (10:1) as eluent (33.1 mg, 56%). <sup>1</sup>H NMR (400 MHz, Chloroform-*d*) δ 7.93 (d, *J* = 8.3 Hz, 2H), 7.29 (d, *J* = 8.1 Hz, 2H), 5.08 (q, *J* = 6.9 Hz, 1H), 3.37 – 3.18 (m, 4H), 2.42

(s, 3H), 1.63 (d,  $J = 6.9$  Hz, 3H), 1.60 – 1.48 (m, 6H).  $^{13}\text{C}$  NMR (100 MHz, Chloroform-*d*)  $\delta$  192.9, 145.1, 133.7, 129.4, 129.3, 62.8, 47.9, 26.1, 23.7, 21.7, 13.4. HRMS (ESI/Q-TOF)  $m/z$ :  $[\text{M}+\text{Na}]^+$  calcd for  $\text{C}_{15}\text{H}_{21}\text{NNaO}_3\text{S}$  318.1134; found: 318.1133.

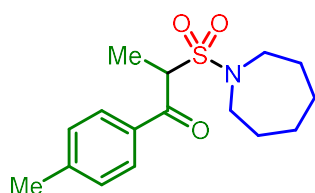

### 2-(azepan-1-ylsulfonyl)-1-(p-tolyl)propan-1-one (3z)

Prepared by the general procedure, isolated as white solid using petroleum ether/ethyl acetate (15:1) as eluent (55.1 mg, 89%).  $^1\text{H}$  NMR (400 MHz, Chloroform-*d*)  $\delta$  7.93 (d,  $J = 8.2$  Hz, 2H), 7.29 (d,  $J = 8.0$  Hz, 2H), 5.12 (q,  $J = 6.9$  Hz, 1H), 3.38 – 3.18 (m, 4H), 2.42 (s, 3H), 1.75 – 1.61 (m, 7H), 1.61 – 1.50 (m, 4H).  $^{13}\text{C}$  NMR (100 MHz, Chloroform-*d*)  $\delta$  193.1, 145.2, 133.9, 129.6, 129.4, 63.0, 50.0, 30.0, 26.8, 21.8, 13.7. HRMS (ESI/Q-TOF)  $m/z$ :  $[\text{M}+\text{Na}]^+$  calcd for  $\text{C}_{16}\text{H}_{23}\text{NNaO}_3\text{S}$  332.1291; found: 332.1294.

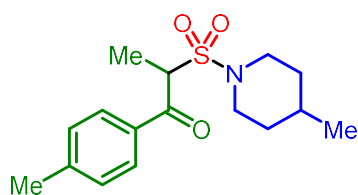

### 2-((4-methylpiperidin-1-yl)sulfonyl)-1-(p-tolyl)propan-1-one (3aa)

Prepared by the general procedure, isolated as white solid using petroleum ether/ethyl acetate (15:1) as eluent (37.8 mg, 61%).  $^1\text{H}$  NMR (400 MHz, Chloroform-*d*)  $\delta$  7.93 (d,  $J = 8.3$  Hz, 2H), 7.29 (d,  $J = 8.1$  Hz, 2H), 5.09 (q,  $J = 6.9$  Hz, 1H), 3.85-3.71 (m, 1H), 3.71-3.57 (m, 1H), 2.99-2.74 (m, 2H), 2.42 (s, 3H), 1.63 (d,  $J = 6.9$  Hz, 3H), 1.62-1.53 (m, 2H), 1.53-1.39 (m, 1H), 1.25-1.06 (m, 2H), 0.91 (d,  $J = 6.6$  Hz, 3H).  $^{13}\text{C}$  NMR (100 MHz, Chloroform-*d*)  $\delta$  192.9, 145.1, 133.7, 129.5, 129.3, 62.8, 47.3, 34.2, 30.3, 21.7, 21.6, 13.4. HRMS (ESI/Q-TOF)  $m/z$ :  $[\text{M}+\text{Na}]^+$  calcd for  $\text{C}_{16}\text{H}_{23}\text{NNaO}_3\text{S}$  332.1291; found: 332.1295.

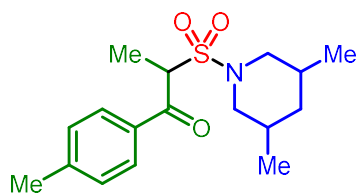

### 2-((3,5-dimethylpiperidin-1-yl)sulfonyl)-1-(p-tolyl)propan-1-one (3ab)

Prepared by the general procedure,  $\text{Cu}(\text{MeCN})_4\text{PF}_6$  (15 mg, 20.0 mol%) instead of  $\text{Cu}(\text{MeCN})_4\text{PF}_6$  (9 mg, 12.0 mol%), isolated as white solid using petroleum ether/ethyl acetate (15:1) as eluent (52.4 mg, 81%).  $^1\text{H}$  NMR (400 MHz, Chloroform-*d*)  $\delta$  7.92 (d,  $J = 8.2$  Hz, 2H), 7.29 (d,  $J = 8.2$  Hz, 2H), 5.09 (q,  $J = 6.9$  Hz, 1H), 3.81-3.69 (m, 1H), 3.60-3.49 (m, 1H), 2.42 (s, 3H), 2.40-2.24 (m, 2H), 1.78-1.53 (m, 6H), 0.81 (dd,  $J = 17.5, 6.6$  Hz, 6H), 0.63 (q,  $J = 12.1$  Hz, 1H).  $^{13}\text{C}$  NMR (100 MHz, Chloroform-*d*)  $\delta$  193.1, 145.2, 133.9, 129.6, 129.4, 63.0, 53.7 (d,  $J = 8.6$  Hz), 41.8, 31.9, 21.8, 18.9 (d,  $J = 2.8$  Hz), 13.5. HRMS (ESI/Q-TOF)  $m/z$ :  $[\text{M}+\text{H}]^+$  calcd for  $\text{C}_{17}\text{H}_{26}\text{NO}_3\text{S}$  324.1628; found: 324.1623.

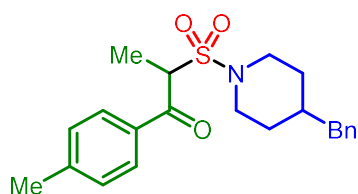

### 2-((4-benzylpiperidin-1-yl)sulfonyl)-1-(p-tolyl)propan-1-one (3ac)

Prepared by the general procedure, isolated as white solid using petroleum ether/ethyl acetate (10:1) as eluent (45.5 mg, 59%).  $^1\text{H}$  NMR (400 MHz, Chloroform-*d*)  $\delta$  7.84 (d,  $J = 8.3$  Hz, 2H), 7.28 – 7.15 (m, 4H), 7.15 – 7.08 (m, 1H), 7.08 – 6.98 (m, 2H), 5.01 (q,  $J = 6.9$  Hz, 1H), 3.76 – 3.52 (m, 2H), 2.81 – 2.65 (m, 2H), 2.43 (d,  $J = 6.8$  Hz, 2H), 2.34 (s, 3H), 1.61 – 1.47 (m, 6H), 1.24 – 1.06 (m, 2H).  $^{13}\text{C}$  NMR (100 MHz, Chloroform-*d*)  $\delta$  193.0, 145.2, 139.9, 133.8, 129.6, 129.4, 129.2, 128.4, 126.2, 62.9, 47.4, 42.9, 37.6, 32.4, 21.8, 13.5. HRMS (ESI/Q-TOF)  $m/z$ :  $[\text{M}+\text{H}]^+$  calcd for  $\text{C}_{22}\text{H}_{28}\text{NO}_3\text{S}$  386.1784;

found: 386.1777.

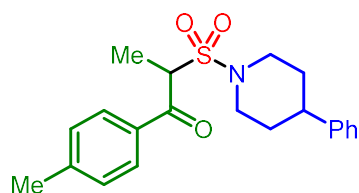

**2-((4-phenylpiperidin-1-yl)sulfonyl)-1-(p-tolyl)propan-1-one (3ad)** Prepared by the general procedure, isolated as white solid using petroleum ether/ethyl acetate (10:1) as eluent (55.7 mg, 75%). <sup>1</sup>H NMR (400 MHz, Chloroform-*d*) δ 7.97 (d, *J* = 8.2 Hz, 2H), 7.38-7.27 (m, 4H), 7.24-7.13 (m, 3H), 5.16 (q, *J* = 6.9 Hz, 1H), 4.03-3.92 (m, 1H), 3.86-3.75 (m, 1H), 3.11-2.90 (m, 2H), 2.66-2.53 (m, 1H), 2.44 (s, 3H), 1.86-1.59 (m, 7H). <sup>13</sup>C NMR (100 MHz, Chloroform-*d*) δ 192.8, 145.2, 145.0, 133.7, 129.5, 129.3, 128.5, 126.7, 126.5, 62.8, 47.6, 42.0, 33.4 (d, *J* = 7.7 Hz), 21.7, 13.4. HRMS (ESI/Q-TOF) *m/z*: [M+H]<sup>+</sup> calcd for C<sub>21</sub>H<sub>26</sub>NO<sub>3</sub>S 372.1628; found: 372.1620.

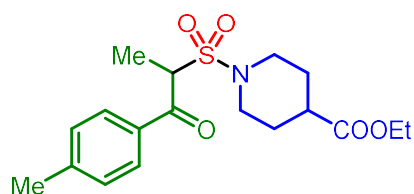

**ethyl 1-((1-oxo-1-(p-tolyl)propan-2-yl)sulfonyl)piperidine-4-carboxylate (3ae)** Prepared by the general procedure, Cu(MeCN)<sub>4</sub>PF<sub>6</sub> (15 mg, 20.0 mol%) instead of Cu(MeCN)<sub>4</sub>PF<sub>6</sub> (9 mg, 12.0 mol%), isolated as white solid using petroleum ether/ethyl acetate (10:1) as eluent (60.3 mg, 82%). <sup>1</sup>H NMR (400 MHz, Chloroform-*d*) δ 7.91 (d, *J* = 8.2 Hz, 2H), 7.29 (d, *J* = 8.1 Hz, 2H), 5.09 (q, *J* = 6.9 Hz, 1H), 4.12 (q, *J* = 7.1 Hz, 2H), 3.80 – 3.58 (m, 2H), 3.06 – 2.90 (m, 2H), 2.47 – 2.34 (m, 4H), 1.95 – 1.83 (m, 2H), 1.78 – 1.64 (m, 2H), 1.62 (d, *J* = 6.9 Hz, 3H), 1.23 (t, *J* = 7.1 Hz, 3H). <sup>13</sup>C NMR (100 MHz, Chloroform-*d*) δ 193.0, 174.0, 145.4, 133.7, 129.7, 129.4, 63.0, 60.8 (d, *J* = 2.4 Hz), 46.4 (d, *J* = 4.4 Hz), 40.4, 28.4 (d, *J* = 5.9 Hz), 21.8 (d, *J* = 2.6 Hz), 14.3, 13.5. HRMS (ESI/Q-TOF) *m/z*: [M+H]<sup>+</sup> calcd for C<sub>18</sub>H<sub>26</sub>NO<sub>5</sub>S 368.1526; found: 368.1518.

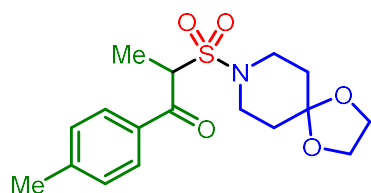

**2-((1,4-dioxa-8-azaspiro[4.5]decan-8-yl)sulfonyl)-1-(p-tolyl)propan-1-one (3af)** Prepared by the general procedure, Cu(MeCN)<sub>4</sub>PF<sub>6</sub> (15 mg, 20.0 mol%) instead of Cu(MeCN)<sub>4</sub>PF<sub>6</sub> (9 mg, 12.0 mol%), isolated as white solid using petroleum ether/ethyl acetate (5:1) as eluent (50.2 mg, 71%). <sup>1</sup>H NMR (400 MHz, Chloroform-*d*) δ 7.91 (d, *J* = 8.1 Hz, 2H), 7.28 (d, *J* = 8.2 Hz, 2H), 5.10 (q, *J* = 6.9 Hz, 1H), 3.93 (s, 4H), 3.50-3.34 (m, 4H), 2.41 (s, 3H), 1.76-1.64 (m, 4H), 1.62 (d, *J* = 6.9 Hz, 3H). <sup>13</sup>C NMR (100 MHz, Chloroform-*d*) δ 192.6, 145.1, 133.6, 129.5, 129.2, 106.2, 64.4, 62.9, 45.2, 35.4, 21.7, 13.3. HRMS (ESI/Q-TOF) *m/z*: [M+Na]<sup>+</sup> calcd for C<sub>17</sub>H<sub>23</sub>NNaO<sub>5</sub>S 376.1189; found: 376.1185.

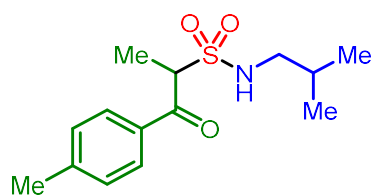

**N-isobutyl-1-oxo-1-(p-tolyl)propane-2-sulfonamide (3ag)** Prepared by the general procedure, isolated as white solid using petroleum ether/ethyl acetate (3:1) as eluent (26.6 mg, 47%). <sup>1</sup>H NMR (400 MHz, Chloroform-*d*) δ 7.90 (d, *J* = 16 Hz, 2H), 7.30 (d, *J* = 8.2 Hz, 2H), 5.08 (q, *J* = 7.0 Hz, 1H), 4.68 (br s, 1H), 3.08-2.91 (m, 2H), 2.42 (s, 3H), 1.81-1.70 (m, 1H), 1.67 (d, *J* = 7.0 Hz, 3H), 0.92 (dd, *J* = 6.7, 2.2 Hz, 6H). <sup>13</sup>C NMR (100 MHz, Chloroform-*d*) δ 194.1, 145.4, 133.1, 129.6, 129.1, 62.5, 51.7, 29.4, 21.7, 19.7, 14.0. HRMS (ESI/Q-TOF) *m/z*: [M+Na]<sup>+</sup> calcd for

C<sub>14</sub>H<sub>21</sub>NNaO<sub>3</sub>S 306.1134; found: 306.1127.

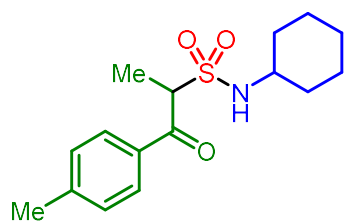

**N-cyclohexyl-1-oxo-1-(p-tolyl)propane-2-sulfonamide (3ah)**

Prepared by the general procedure, isolated as white solid using petroleum ether/ethyl acetate (10:1) as eluent (30.3 mg, 49%). <sup>1</sup>H NMR (400 MHz, Chloroform-*d*) δ 7.89 (d, *J* = 8.3 Hz, 2H), 7.30 (d, *J* = 8.0 Hz, 2H), 5.04 (q, *J* = 7.0 Hz, 1H), 4.46 – 4.39 (m, 1H), 3.36 – 3.23 (m, 1H), 2.43 (s, 3H), 2.05 – 1.92 (m, 2H), 1.75 – 1.64 (m, 5H), 1.60 – 1.52 (m, 1H), 1.34 – 1.19 (m, 5H). <sup>13</sup>C NMR (100 MHz, Chloroform-*d*) δ 194.0, 145.5, 133.4, 129.7, 129.3, 63.0, 53.9, 35.2, 34.8, 25.3, 25.0, 25.0, 14.3. HRMS (ESI/Q-TOF) *m/z*: [M+Na]<sup>+</sup> calcd for C<sub>16</sub>H<sub>23</sub>NNaO<sub>3</sub>S 332.1285; found: 332.1291.

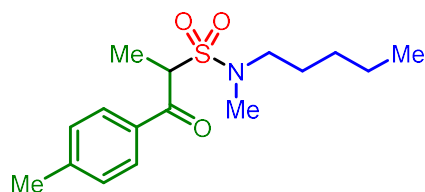

**N-methyl-1-oxo-N-pentyl-1-(p-tolyl)propane-2-sulfonamide (3ai)**

Prepared by the general procedure, Cu(MeCN)<sub>4</sub>PF<sub>6</sub> (12 mg, 15.0 mol%) instead of Cu(MeCN)<sub>4</sub>PF<sub>6</sub> (9 mg, 12.0 mol%), isolated as white solid using petroleum ether/ethyl acetate (15:1) as eluent (57.9 mg, 93%). <sup>1</sup>H NMR (400 MHz, Chloroform-*d*) δ 7.93 (d, *J* = 8.2 Hz, 2H), 7.30 (d, *J* = 8.1 Hz, 2H), 5.11 (q, *J* = 6.9 Hz, 1H), 3.21 – 3.05 (m, 2H), 2.83 (s, 3H), 2.42 (s, 3H), 1.65 (d, *J* = 7.0 Hz, 3H), 1.57 – 1.45 (m, 2H), 1.33 – 1.20 (m, 4H), 0.86 (t, *J* = 7.1 Hz, 3H). <sup>13</sup>C NMR (100 MHz, Chloroform-*d*) δ 193.1, 145.3, 133.8, 129.7, 129.4, 63.0, 51.2, 35.4, 28.6, 27.8, 22.4, 21.9, 14.1, 13.8. HRMS (ESI/Q-TOF) *m/z*: [M+Na]<sup>+</sup> calcd for C<sub>16</sub>H<sub>25</sub>NNaO<sub>3</sub>S 334.1447; found: 334.1450.

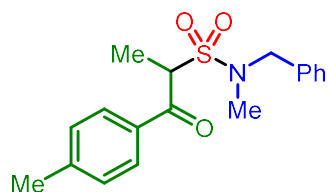

**N-benzyl-N-methyl-1-oxo-1-(p-tolyl)propane-2-sulfonamide (3aj)**

Prepared by the general procedure, Cu(MeCN)<sub>4</sub>PF<sub>6</sub> (15 mg, 20.0 mol%) instead of Cu(MeCN)<sub>4</sub>PF<sub>6</sub> (9 mg, 12.0 mol%), isolated as white solid using petroleum ether/ethyl acetate (5:1) as eluent (57.7 mg, 87%). <sup>1</sup>H NMR (400 MHz, Chloroform-*d*) δ 7.92 (d, *J* = 8.3 Hz, 2H), 7.36 – 7.15 (m, 7H), 5.17 (q, *J* = 7.0 Hz, 1H), 4.33 – 4.20 (m, 2H), 2.71 (s, 3H), 2.38 (s, 3H), 1.68 (d, *J* = 7.0 Hz, 3H). <sup>13</sup>C NMR (100 MHz, Chloroform-*d*) δ 193.2, 145.4, 136.0, 133.8, 129.7, 129.4, 128.7, 128.3, 128.0, 63.3, 55.0, 35.4, 21.9, 13.9. HRMS (ESI/Q-TOF) *m/z*: [M+Na]<sup>+</sup> calcd for C<sub>18</sub>H<sub>21</sub>NNaO<sub>3</sub>S 354.1134; found: 354.1140.

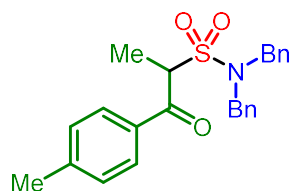

**N,N-dibenzyl-1-oxo-1-(p-tolyl)propane-2-sulfonamide (3ak)**

Prepared by the general procedure, Cu(MeCN)<sub>4</sub>PF<sub>6</sub> (12 mg, 15.0 mol%) instead of Cu(MeCN)<sub>4</sub>PF<sub>6</sub> (9 mg, 12.0 mol%), isolated as colourless oil using petroleum ether/ethyl acetate (15:1) as eluent (77.4 mg, 95%). <sup>1</sup>H NMR (400 MHz, Chloroform-*d*) δ 7.82 (d, *J* = 8.3 Hz, 2H), 7.31 – 7.23 (m, 12H), 5.01 (q, *J* = 7.0 Hz, 1H), 4.40 (s, 4H), 2.45 (s, 3H), 1.70 (d, *J* = 7.0 Hz, 3H). <sup>13</sup>C NMR (100 MHz, Chloroform-*d*) δ 192.8, 145.1, 135.8, 133.4, 129.4, 129.2, 128.6, 128.4, 127.7, 63.9, 52.0, 21.7, 13.8. HRMS (ESI/Q-TOF) *m/z*: [M+H]<sup>+</sup> calcd for C<sub>24</sub>H<sub>26</sub>NO<sub>3</sub>S 408.1628; found: 408.1619.

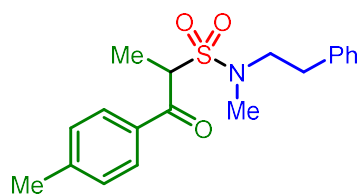

**N-methyl-1-oxo-N-phenethyl-1-(p-tolyl)propane-2-sulfonamide (3al)** Prepared by the general procedure, isolated as white solid using petroleum ether/ethyl acetate (15:1) as eluent (66.3 mg, 96%). <sup>1</sup>H NMR (400 MHz, Chloroform-*d*) δ 7.94 – 7.88 (m, 2H), 7.34 – 7.27 (m, 4H), 7.24 – 7.16 (m, 3H), 5.07 (q, *J* = 6.9 Hz, 1H), 3.44 – 3.35 (m, 2H), 2.91 – 2.82 (m, 5H), 2.43 (s, 3H), 1.63 (d, *J* = 7.0 Hz, 3H). <sup>13</sup>C NMR (100 MHz, Chloroform-*d*) δ 192.8, 145.2, 138.3, 133.7, 129.6, 129.3, 128.9, 128.6, 126.6, 62.9, 52.8, 36.0, 35.4, 21.8, 13.7. HRMS (ESI/Q-TOF) *m/z*: [M+H]<sup>+</sup> calcd for C<sub>19</sub>H<sub>24</sub>NO<sub>3</sub>S 346.1471; found: 346.1466.

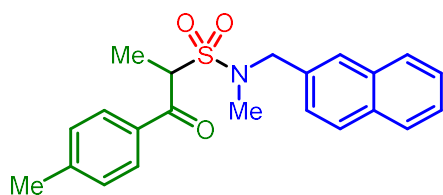

**N-methyl-N-(naphthalen-2-ylmethyl)-1-oxo-1-(p-tolyl)propane-2-sulfonamide (3am)** Prepared by the general procedure, isolated as white solid using petroleum ether/ethyl acetate (5:1) as eluent (46.5 mg, 61%). <sup>1</sup>H NMR (400 MHz, Chloroform-*d*) δ 8.22 (d, *J* = 8.4 Hz, 1H), 7.99 (d, *J* = 8.3 Hz, 2H), 7.88 – 7.78 (m, 2H), 7.59 – 7.39 (m, 4H), 7.32 (d, *J* = 8.1 Hz, 2H), 5.26 (q, *J* = 7.0 Hz, 1H), 4.93 – 4.77 (m, 2H), 2.76 (s, 3H), 2.44 (s, 3H), 1.80 (d, *J* = 7.0 Hz, 3H). <sup>13</sup>C NMR (100 MHz, Chloroform-*d*) δ 193.3, 145.5, 133.9, 133.8, 131.7, 131.0, 129.7, 129.5, 129.0, 128.8, 127.3, 126.7, 126.1, 125.3, 123.5, 63.5, 52.9, 35.6, 21.9, 14.1. HRMS (ESI/Q-TOF) *m/z*: [M+H]<sup>+</sup> calcd for C<sub>22</sub>H<sub>24</sub>NO<sub>3</sub>S 382.1471; found: 382.1466.

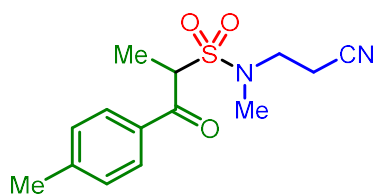

**N-(2-cyanoethyl)-N-methyl-1-oxo-1-(p-tolyl)propane-2-sulfonamide (3an)** Prepared by the general procedure, Cu(MeCN)<sub>4</sub>PF<sub>6</sub> (15 mg, 20.0 mol%) instead of Cu(MeCN)<sub>4</sub>PF<sub>6</sub> (9 mg, 12.0 mol%), isolated as white solid using petroleum ether/ethyl acetate (2:1) as eluent (35.3 mg, 60%). <sup>1</sup>H NMR (400 MHz, Chloroform-*d*) δ 7.91 (d, *J* = 8.2 Hz, 2H), 7.31 (d, *J* = 8.1 Hz, 2H), 5.16 (q, *J* = 7.0 Hz, 1H), 3.50–3.36 (m, 2H), 2.98 (s, 3H), 2.59 (t, *J* = 6.9 Hz, 2H), 2.43 (s, 3H), 1.67 (d, *J* = 7.0 Hz, 3H). <sup>13</sup>C NMR (100 MHz, Chloroform-*d*) δ 192.9, 145.9, 133.4, 129.9, 129.4, 117.6, 63.3, 47.4, 36.8, 21.9, 18.3, 13.9. HRMS (ESI/Q-TOF) *m/z*: [M+Na]<sup>+</sup> calcd for C<sub>14</sub>H<sub>18</sub>N<sub>2</sub>NaO<sub>3</sub>S 317.0930; found: 317.0932.

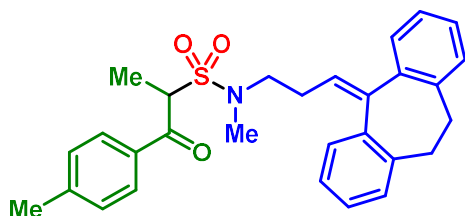

**N-(3-(10,11-dihydro-5H-dibenzo[a,d][7]annulen-5-ylidene)propyl)-N-methyl-1-oxo-1-(p-tolyl)propane-2-sulfonamide (3ao)** Prepared by the general procedure, isolated as colourless oil using petroleum ether/ethyl acetate (15:1) as eluent (57.5 mg, 61%). <sup>1</sup>H NMR (400 MHz, Chloroform-*d*) δ 7.92 (d, *J* = 8.2 Hz, 2H), 7.32 – 7.24 (m, 3H), 7.23 – 7.06 (m, 6H), 7.06 – 6.99 (m, 1H), 5.78 (t, *J* = 7.4 Hz, 1H), 5.10 (q, *J* = 7.0 Hz, 1H), 3.49 – 3.13 (m, 4H), 3.02 – 2.86 (m, 1H), 2.83 – 2.66 (m, 4H), 2.43 (s, 3H), 2.41 – 2.29 (m, 2H), 1.64 (d, *J* = 6.9 Hz, 3H). <sup>13</sup>C NMR (100 MHz, Chloroform-*d*) δ 193.0, 145.4, 145.2, 140.9, 139.8, 139.5, 137.1, 133.7, 130.1, 129.7, 129.4,

128.7, 128.2, 128.1, 127.7, 127.3, 126.9, 126.2, 125.9, 63.0, 50.9, 35.4, 33.8, 32.0, 28.4, 21.9, 13.7. HRMS (ESI/Q-TOF)  $m/z$ :  $[M+H]^+$  calcd for  $C_{29}H_{32}NO_3S$  474.2097; found: 474.2088.

## 5. Unsuccessful silyl enol ethers

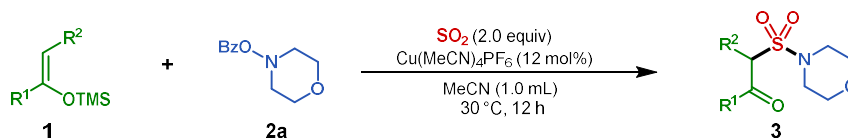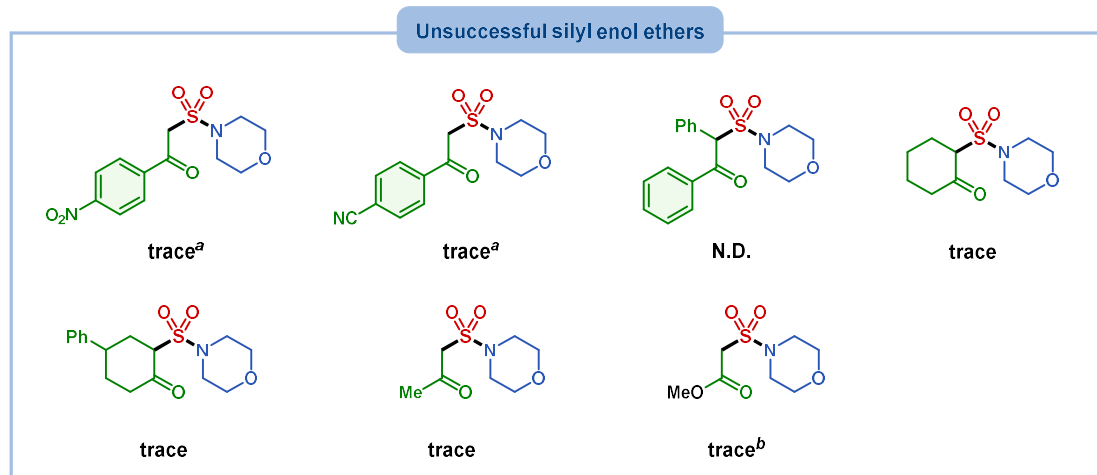

<sup>a</sup>The reaction substrate is unstable. <sup>b</sup>The reaction substrate is *tert*-butyl((1-methoxyvinyl)oxy)dimethylsilane.

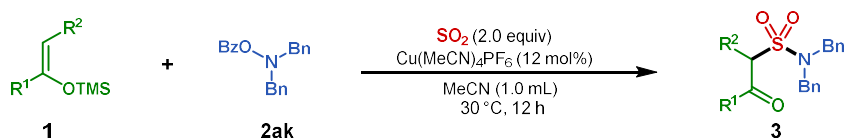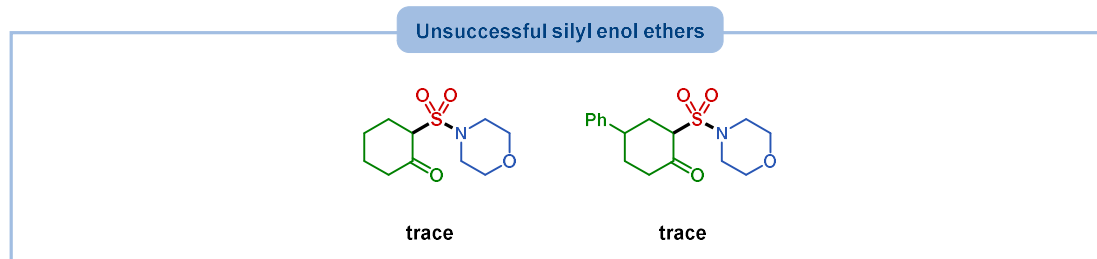

## 6. Scale-up reaction

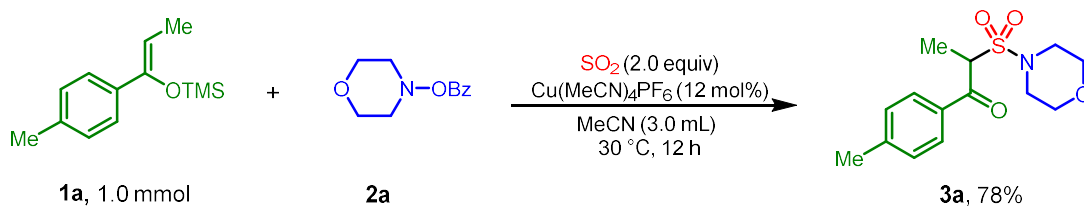

In the glovebox, compound **1a** (1.0 mmol, 1.0 equiv.), compound **2a** (3.0 mmol, 3.0 equiv.),  $Cu(MeCN)_4PF_6$  (44.7 mg, 12.0 mol%) were added into chamber B with a magnetic stirring bar,

followed by addition of MeCN (3.0 mL). Tetrabromothiophene S,S-dioxides (863.4 mg, 2.0 equiv.), 4-methylphenylene (320  $\mu$ L, 2.4 equiv.) was added to chamber B with a magnetic stirring bar, followed by addition of tetradecane (3.0 mL). The two chamber system was sealed and removed out of the glovebox. The chamber A was allowed to stir at 100 °C using heating mantle with 600-800 rpm stirring speed for 10 min. Then chamber B was heated to 30 °C in heat block. After 12 hours, two chamber was cooled to room temperature. Upon completion, the reaction mixture was purified by silica gel column chromatography using petroleum ether/ethyl acetate as eluent to afford pure products **3a** (231 mg, 78%).

## 7. Transformations of $\beta$ -carbonylsulfonamide

### Transformation A of Product 3

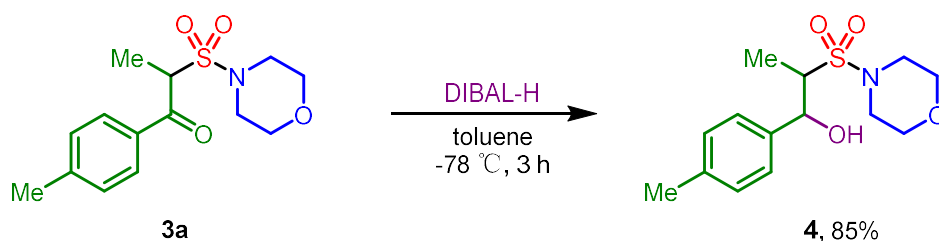

A mixture of compound **3a** (59.5 mg, 0.2 mmol) in toluene (3.0 mL) was added DIBAL-H (2.0 M in hexane, 1.2 mL, 2.4 mmol) dropwise at -78 °C. The reaction mixture was stirred at -78 °C for 3 h. Upon completion, the mixture was slowly quenched with 2 N NaOH (aq) and extracted with ethyl acetate. The combined organic extracts were dried over anhydrous Na<sub>2</sub>SO<sub>4</sub> and evaporated under reduced pressure. The residue was purified by silica gel column chromatography using petroleum ether/ethyl acetate as eluent to afford the corresponding product **4** (50.9 mg, 85%).<sup>[1]</sup>

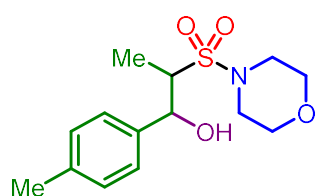

### 2-(morpholin-4-ylsulfonyl)-1-(p-tolyl)propan-1-ol (**4**)

Prepared by the general procedure, isolated as white solid using petroleum ether/ethyl acetate (2:1) as eluent (50.9 mg, 85%). <sup>1</sup>H NMR (400 MHz, Chloroform-*d*)  $\delta$  7.25 – 7.11 (m, 4H), 4.83 (d,  $J$  = 9.0 Hz, 1H), 4.02 (d,  $J$  = 1.5 Hz, 1H), 3.78 – 3.69 (m, 4H), 3.45 – 3.34 (m, 4H), 3.34 – 3.23 (m, 1H), 2.34 (s, 3H), 0.96 (d,  $J$  = 7.1 Hz, 3H). <sup>13</sup>C NMR (100 MHz, Chloroform-*d*)  $\delta$  138.5, 137.0, 129.5, 127.0, 74.0, 67.0, 63.6, 46.4, 21.3, 13.0. HRMS (ESI/Q-TOF)  $m/z$ : [M+Na]<sup>+</sup> calcd for C<sub>14</sub>H<sub>21</sub>NNaO<sub>4</sub>S 322.1083; found: 322.1080.

### Transformation B of Product 3

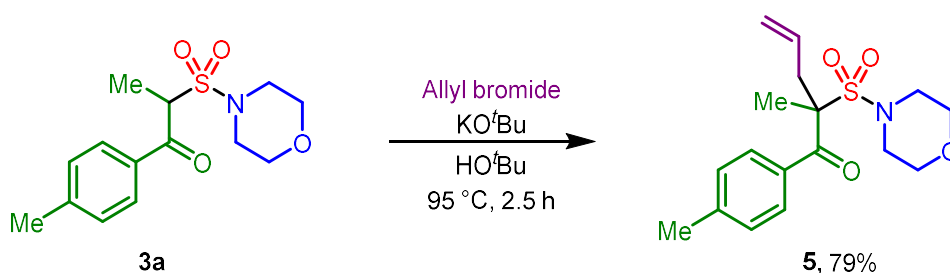

A mixture of compound **3a** (59.5 mg, 0.2 mmol), allyl bromide (0.3 mmol, 1.5 equiv.), potassium *t*-butoxide (0.3 mmol, 1.5 equiv.) in *t*-butyl alcohol (0.6 mL) was heated at reflux for

2.5 h under a nitrogen atmosphere. Upon completion, water was added, and the products were extracted with ethyl acetate. The combined organic extracts were dried over anhydrous Na<sub>2</sub>SO<sub>4</sub> and evaporated under reduced pressure. The residue was purified by silica gel column chromatography using petroleum ether/ethyl acetate as eluent to afford the corresponding product **5** (53.3 mg, 79%).<sup>[2]</sup>

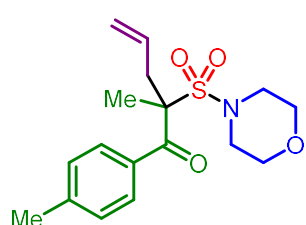

### 2-methyl-2-(morpholinylsulfonyl)-1-(p-tolyl)pent-4-en-1-one (**5**)

Prepared by the general procedure, isolated as yellow oil using petroleum ether/ethyl acetate (6:1) as eluent (53.3 mg, 79%). <sup>1</sup>H NMR (400 MHz, Chloroform-*d*) δ 7.80 (d, *J* = 8.2 Hz, 2H), 7.21 (d, *J* = 8.1 Hz, 2H), 5.53 – 5.36 (m, 1H), 5.15 – 4.99 (m, 2H), 3.77 – 3.60 (m, 4H), 3.45 – 3.25 (m, 5H), 2.57 (dd, *J* = 13.3, 8.3 Hz, 1H), 2.39 (s, 3H), 1.68 (s, 3H). <sup>13</sup>C NMR (100 MHz, Chloroform-*d*) δ 199.3, 142.9, 135.9, 131.0, 129.0, 128.9, 120.8, 76.3, 67.2, 47.9, 40.4, 21.7 (d, *J* = 2.9 Hz), 20.5. HRMS (ESI/Q-TOF) *m/z*: [M+Na]<sup>+</sup> calcd for C<sub>17</sub>H<sub>23</sub>NNaO<sub>4</sub>S 360.1240; found: 360.1244.

### Transformation C of Product 3

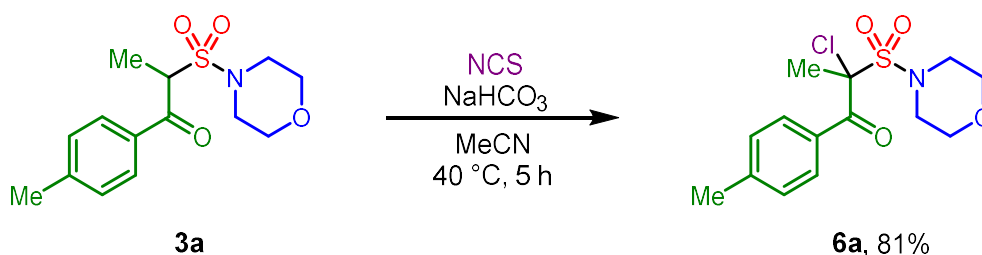

A mixture of compound **3a** (59.5 mg, 0.2 mmol) and N-chlorosuccinimide (0.26 mmol, 1.3 equiv.) in MeCN (0.8 mL) was added saturated NaHCO<sub>3</sub> (0.2 mL). The reaction mixture was stirred at 40 °C for 5 h. Upon completion, water was added, and the products were extracted with DCM. The combined organic extracts were dried over anhydrous Na<sub>2</sub>SO<sub>4</sub> and evaporated under reduced pressure. The residue was purified by silica gel column chromatography using petroleum ether/ethyl acetate as eluent to afford the corresponding product **6a** (53.6 mg, 81%).<sup>[3]</sup>

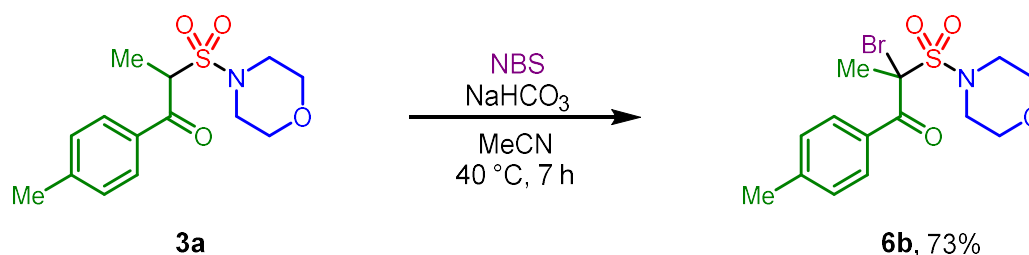

A mixture of compound **3a** (59.5 mg, 0.2 mmol) and N-bromosuccinimide (0.26 mmol, 1.3 equiv.) in MeCN (0.8 mL) was added saturated NaHCO<sub>3</sub> (0.2 mL). The reaction mixture was stirred at 40 °C for 7 h. Upon completion, water was added, and the products were extracted with DCM. The combined organic extracts were dried over anhydrous Na<sub>2</sub>SO<sub>4</sub> and evaporated under reduced pressure. The residue was purified by silica gel column chromatography using petroleum ether/ethyl acetate as eluent to afford the corresponding product **6b** (54.7 mg, 73%).<sup>[3]</sup>



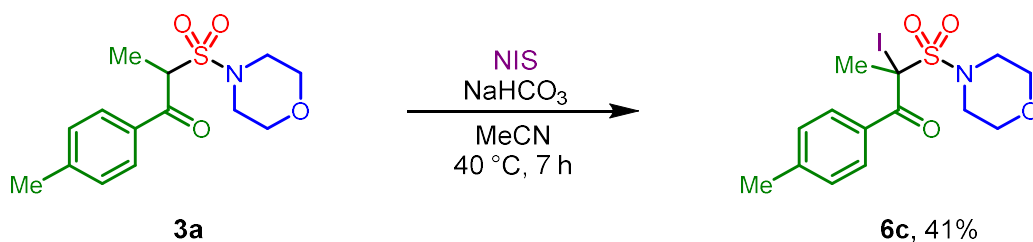

A mixture of compound **3a** (59.5 mg, 0.2 mmol) and N-iodosuccinimide (0.26 mmol, 1.3 equiv.) in MeCN (0.8 mL) was added saturated NaHCO<sub>3</sub> (0.2 mL). The reaction mixture was stirred at 40 °C for 7 h. Upon completion, water was added, and the products were extracted with DCM. The combined organic extracts were dried over anhydrous Na<sub>2</sub>SO<sub>4</sub> and evaporated under reduced pressure. The residue was purified by silica gel column chromatography using petroleum ether/ethyl acetate as eluent to afford the corresponding product **6c** (35.0 mg, 41%).<sup>[3]</sup>

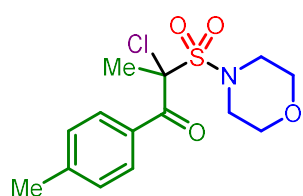

#### 2-chloro-2-(morpholinosulfonyl)-1-(p-tolyl)propan-1-one (**6a**)

Prepared by the general procedure, isolated as pale yellow solid using petroleum ether/ethyl acetate (10:1) as eluent (53.6 mg, 81%). <sup>1</sup>H NMR (400 MHz, Chloroform-*d*) δ 8.09 – 8.02 (m, 2H), 7.27 – 7.21 (m, 2H), 3.75 – 3.65 (m, 4H), 3.52 – 3.39 (m, 4H), 2.40 (s, 3H), 2.17 (s, 3H). <sup>13</sup>C NMR (100 MHz, Chloroform-*d*) δ 191.7, 144.6, 132.0, 130.8, 128.9, 86.4, 67.1, 48.4, 26.8, 21.8. HRMS (ESI/Q-TOF) *m/z*: [M+Na]<sup>+</sup> calcd for C<sub>14</sub>H<sub>18</sub>ClNO<sub>4</sub>S 354.0537; found: 354.0541.

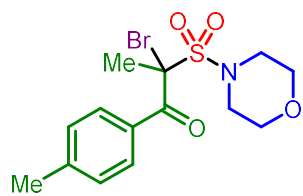

#### 2-bromo-2-(morpholinosulfonyl)-1-(p-tolyl)propan-1-one (**6b**)

Prepared by the general procedure, isolated as pale yellow solid using petroleum ether/ethyl acetate (10:1) as eluent (54.7 mg, 73%). <sup>1</sup>H NMR (400 MHz, Chloroform-*d*) δ 8.10 – 8.03 (m, 2H), 7.25 – 7.19 (m, 2H), 3.74 – 3.64 (m, 4H), 3.54 – 3.40 (m, 4H), 2.40 (s, 3H), 2.34 (s, 3H). <sup>13</sup>C NMR (100 MHz, Chloroform-*d*) δ 191.5, 144.4, 132.3, 130.8, 128.9, 77.0, 67.1, 48.6, 27.9 (d, *J* = 3.8 Hz), 21.7 (d, *J* = 3.9 Hz). HRMS (ESI/Q-TOF) *m/z*: [M+H]<sup>+</sup> calcd for C<sub>14</sub>H<sub>19</sub>BrNO<sub>4</sub>S 376.0213; found: 376.0208.

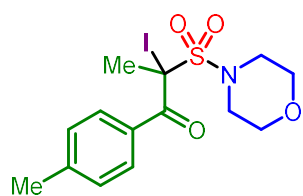

#### 2-iodo-2-(morpholinosulfonyl)-1-(p-tolyl)propan-1-one (**6c**)

Prepared by the general procedure, isolated as brown solid using petroleum ether/ethyl acetate (10:1) as eluent (35.0 mg, 41%). <sup>1</sup>H NMR (400 MHz, Chloroform-*d*) δ 8.10 – 8.05 (m, 2H), 7.25 – 7.20 (m, 2H), 3.74 – 3.66 (m, 4H), 3.54 – 3.41 (m, 4H), 2.57 (s, 3H), 2.41 (s, 3H). <sup>13</sup>C NMR (100 MHz, Chloroform-*d*) δ 192.8, 144.2, 132.6, 130.9, 128.9, 67.2, 56.2, 49.0, 30.8, 21.8. HRMS (ESI/Q-TOF) *m/z*: [M+H]<sup>+</sup> calcd for C<sub>14</sub>H<sub>19</sub>INO<sub>4</sub>S 424.0074; found: 424.0072.

### Transformation D of Product 3

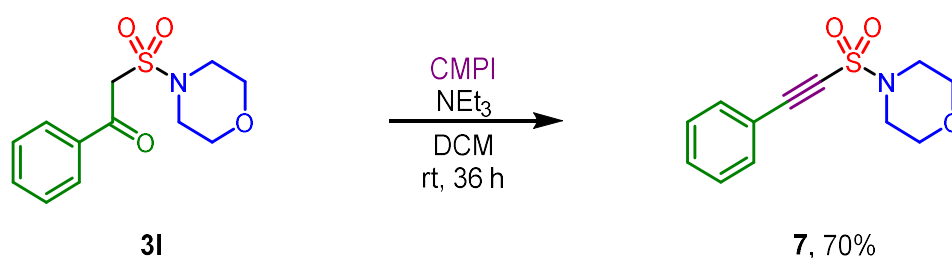

A mixture of compound **3I** (53.9 mg, 0.2 mmol) and 2-Chloro-1-methylpyridinium iodide (0.24 mmol, 1.2 equiv.) in DCM (2.0 mL) was added Et<sub>3</sub>N (0.36 mmol, 1.8 equiv.) dropwise. The reaction mixture was stirred at room temperature for 36 h, then 1N NaOH (0.6 mL) was added. After 5 min, water was added, and the reaction mixture was extracted with DCM. The combined organic extracts were dried over anhydrous Na<sub>2</sub>SO<sub>4</sub> and the residue was filtered through a short column of Al<sub>2</sub>O<sub>3</sub> using DCM as eluent to afford the corresponding product **7** (35.4 mg, 70%).<sup>[4]</sup>

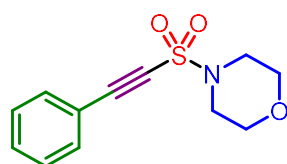

#### 4-((phenylethynyl)sulfonyl)morpholine (**7**)

Prepared by the general procedure, isolated as white solid (35.4 mg, 70%). <sup>1</sup>H NMR (400 MHz, Chloroform-*d*) δ 7.62 – 7.56 (m, 2H), 7.54 – 7.48 (m, 1H), 7.46 – 7.39 (m, 2H), 3.89 – 3.81 (m, 4H), 3.30 – 3.21 (m, 4H). <sup>13</sup>C NMR (100 MHz, Chloroform-*d*) δ 133.0, 131.6, 129.0, 118.0, 91.6, 79.3, 65.9, 46.5. HRMS (ESI/Q-TOF) *m/z*: [M+Na]<sup>+</sup> calcd for C<sub>12</sub>H<sub>13</sub>NNaO<sub>3</sub>S 274.0508; found: 274.0509.

## 8. Mechanistic Studies

### Radical trapping experiments A

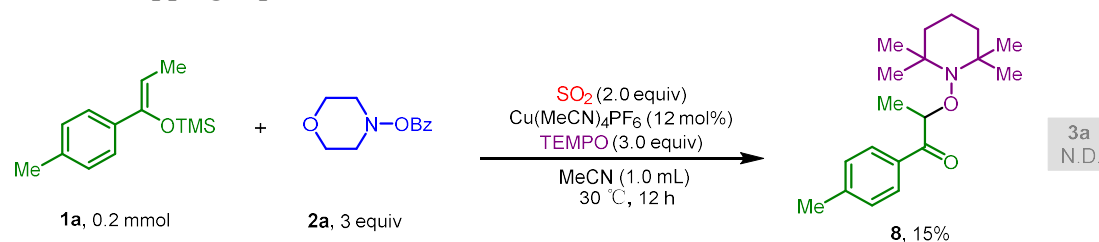

In the glovebox, compound **1a** (0.2 mmol, 1.0 equiv.), compound **2a** (0.6 mmol, 3.0 equiv.), Cu(MeCN)<sub>4</sub>PF<sub>6</sub> (9.0 mg, 12.0 mol%), TEMPO (0.6 mmol, 3.0 equiv.) were added into chamber B with a magnetic stirring bar, followed by addition of MeCN (1.0 mL). Tetrabromothiophene S,S-dioxides (0.4 mmol, 172.7 mg), 4-methylphenylene (0.48 mmol, 64 μL) was added to chamber A with a magnetic stirring bar, followed by addition of tetradecane (1.0 mL). The two chamber system was sealed and removed out of the glovebox. The chamber A was allowed to stir at 100 °C using heating mantle with 600-800 rpm stirring speed for 10 min. Then chamber B was heated to 30 °C in heat block. After 12 hours, two chamber was cooled to room temperature. TLC, GC and LC-MS analysis demonstrated the product **3a** is not founded. The TEMPO-adduct **5a** was detected by LC-MS. The reaction mixture was purified by silica gel column chromatography using petroleum ether/ethyl acetate as eluent to afford the TEMPO-adduct **8** (9.3 mg, 15%).

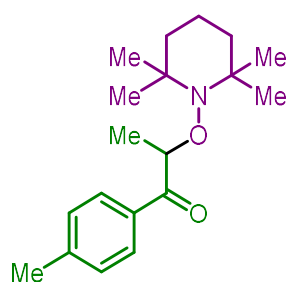

**2-((2,2,6,6-tetramethylpiperidin-1-yl)oxy)-1-(p-tolyl)propan-1-one (8)** Prepared by the general procedure, isolated as colourless oil using petroleum ether/ethyl acetate (80:1) as eluent (9.3 mg, 15%). <sup>1</sup>H NMR (400 MHz, Chloroform-*d*) δ 7.99 (d, *J* = 8.2 Hz, 2H), 7.31 – 7.21 (m, 2H), 4.98 (q, *J* = 7.1 Hz, 1H), 2.41 (s, 3H), 1.53 – 1.47 (m, 5H), 1.39 (s, 2H), 1.33 – 1.26 (m, 5H), 1.18 (s, 3H), 1.04 (s, 3H), 0.87 (s, 3H). <sup>13</sup>C NMR (100 MHz, Chloroform-*d*) δ 201.7, 144.0, 132.8, 129.5, 129.3, 86.6, 86.5, 59.8, 40.4, 21.9, 21.8, 20.5, 19.5, 19.5, 17.3. HRMS (ESI/Q-TOF) *m/z*: [M+H]<sup>+</sup> calcd for C<sub>19</sub>H<sub>30</sub>NO<sub>2</sub> 304.2271; found: 304.2276.

## Radical trapping experiments B

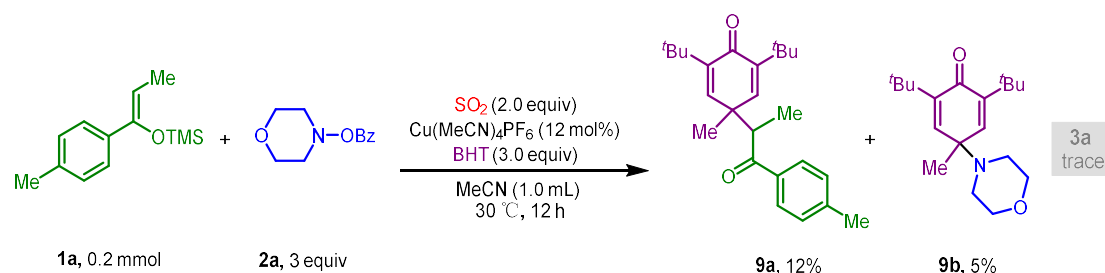

In the glovebox, compound **1a** (0.2 mmol, 1.0 equiv.), compound **2a** (0.6 mmol, 3.0 equiv.), Cu(MeCN)<sub>4</sub>PF<sub>6</sub> (9.0 mg, 12.0 mol%), BHT (0.6 mmol, 3.0 equiv.) were added into chamber B with a magnetic stirring bar, followed by addition of MeCN (1.0 mL). Tetrabromothiophene S,S-dioxides (0.4 mmol, 172.7 mg), 4-methylphenylene (0.48 mmol, 64 μL) was added to chamber A with a magnetic stirring bar, followed by addition of tetradecane (1.0 mL). The two chamber system was sealed and removed out of the glovebox. The chamber A was allowed to stir at 100 °C using heating mantle with 600-800 rpm stirring speed for 10 min. Then chamber B was heated to 30 °C in heat block. After 12 hours, two chamber was cooled to room temperature. Upon completion, the reaction mixture was purified by silica gel column chromatography using petroleum ether/ethyl acetate as eluent to afford compound **9a** (8.9 mg, 12%) and compound **9b** (8.6 mg, 5%).

## 2,6-di-tert-butyl-4-methyl-4-(1-oxo-1-(p-tolyl)propan-2-yl)cyclohexa-2,5-dien-1-one (9a)

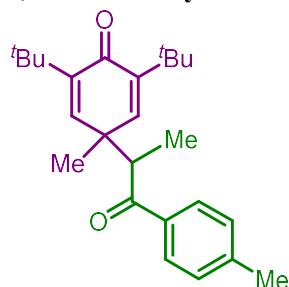

Prepared by the general procedure, isolated as pale oil using petroleum ether/ethyl acetate (50:1) as eluent (8.9 mg, 12%). <sup>1</sup>H NMR (400 MHz, Chloroform-*d*) δ 7.85 (d, *J* = 8.2 Hz, 2H), 7.27 (d, *J* = 9.0 Hz, 2H), 6.88 (d, *J* = 2.9 Hz, 1H), 6.43 (d, *J* = 2.9 Hz, 1H), 3.70 (q, *J* = 6.9 Hz, 1H), 2.42 (s, 3H), 1.23 (s, 9H), 1.19 – 1.16 (m, 12H), 1.02 (d, *J* = 7.0 Hz, 3H). HRMS (ESI/Q-TOF) *m/z*: [M+H]<sup>+</sup> calcd for C<sub>25</sub>H<sub>35</sub>O<sub>2</sub> 367.2632; found: 367.2625.

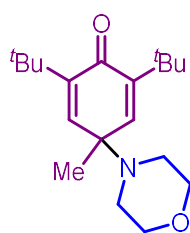

### 2,6-di-tert-butyl-4-methyl-4-morpholinocyclohexa-2,5-dien-1-one (9b)

Prepared by the general procedure, isolated as pale oil using petroleum ether/ethyl acetate (15:1) as eluent (8.6 mg, 5%). <sup>1</sup>H NMR (400 MHz, Chloroform-*d*) 6.60 (s, 2H), 3.61 – 3.48 (m, 4H), 3.23 – 3.09 (m, 4H), 1.71 (s, 3H), 1.25 (s, 18H). HRMS (ESI/Q-TOF) *m/z*: [M+H]<sup>+</sup> calcd for C<sub>19</sub>H<sub>32</sub>NO<sub>2</sub> 306.2428; found: 306.2427.

## Radical trapping experiments C

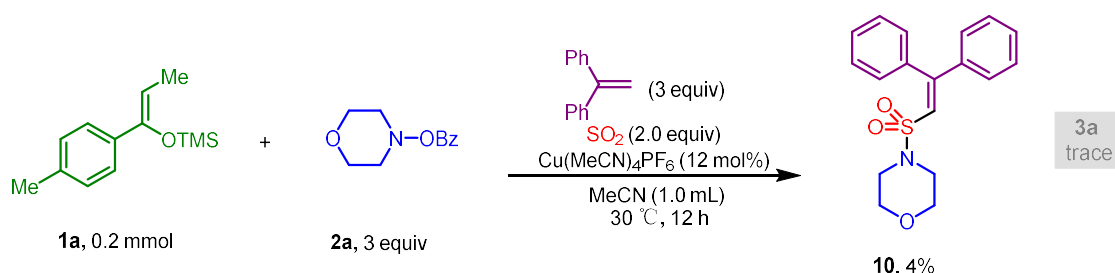

In the glovebox, compound **1a** (0.2 mmol, 1.0 equiv.), compound **2a** (0.6 mmol, 3.0 equiv.), Cu(MeCN)<sub>4</sub>PF<sub>6</sub> (9.0 mg, 12.0 mol%), 1,1-Diphenylethylene (0.6 mmol, 3.0 equiv.) were added into chamber B with a magnetic stirring bar, followed by addition of MeCN (1.0 mL). Tetrabromothiophene S,S-dioxides (0.4 mmol, 172.7 mg), 4-methylphenylene (0.48 mmol, 64 μL) was added to chamber A with a magnetic stirring bar, followed by addition of tetradecane (1.0 mL). The two chamber system was sealed and removed out of the glovebox. The chamber A was allowed to stir at 100 °C using heating mantle with 600-800 rpm stirring speed for 10 min. Then chamber B was heated to 30 °C in heat block. After 12 hours, two chamber was cooled to room temperature. Upon completion, the reaction mixture was purified by silica gel column chromatography using petroleum ether/ethyl acetate as eluent to afford compound **10** (7.5 mg, 4%).

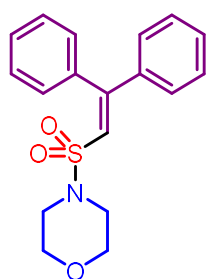

### 4-((2,2-diphenylvinyl)sulfonyl)morpholine (10)

Prepared by the general procedure, isolated as pale oil using petroleum ether/ethyl acetate (5:1) as eluent (7.5 mg, 4%). <sup>1</sup>H NMR (400 MHz, Chloroform-*d*) δ 7.44 – 7.38 (m, 4H), 7.38 – 7.30 (m, 4H), 7.27 – 7.22 (m, 2H), 6.63 (s, 1H), 3.66 – 3.58 (m, 4H), 3.12 – 3.05 (m, 4H). HRMS (ESI/Q-TOF) *m/z*: [M+Na]<sup>+</sup> calcd for C<sub>18</sub>H<sub>19</sub>NNaO<sub>3</sub>S 352.0978; found: 352.0976.

## Radical clock experiment

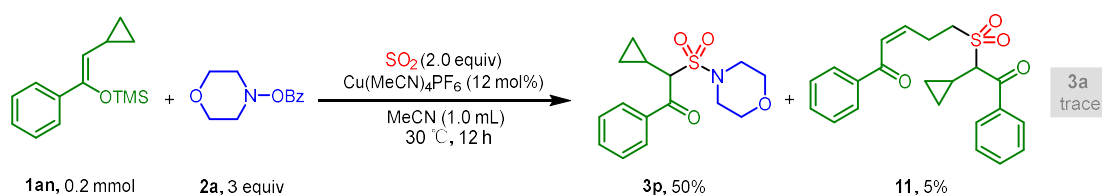

In the glovebox, compound **1an** (0.2 mmol, 1.0 equiv.), compound **2a** (0.6 mmol, 3.0 equiv.), Cu(MeCN)<sub>4</sub>PF<sub>6</sub> (9.0 mg, 12.0 mol%) were added into chamber B with a magnetic stirring bar, followed by addition of MeCN (1.0 mL). Tetrabromothiophene S,S-dioxides (0.4 mmol, 172.7

mg), 4-methylphenylene (0.48 mmol, 64  $\mu$ L) was added to chamber A with a magnetic stirring bar, followed by addition of tetradecane (1.0 mL). The two chamber system was sealed and removed out of the glovebox. The chamber A was allowed to stir at 100  $^{\circ}$ C using heating mantle with 600-800 rpm stirring speed for 10 min. Then chamber B was heated to 30  $^{\circ}$ C in heat block. After 12 hours, two chamber was cooled to room temperature. Upon completion, the reaction mixture was purified by silica gel column chromatography using petroleum ether/ethyl acetate as eluent to afford compound **3p** (30.9 mg, 50%) and compound **11** (2.0 mg, 5%).

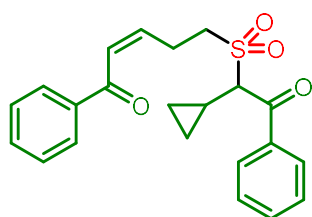

**(Z)-5-((1-cyclopropyl-2-oxo-2-phenylethyl)sulfonyl)-1-phenylpent-2-en-1-one (11)** Prepared by the general procedure, isolated as white solid using petroleum ether/ethyl acetate (5:1) as eluent (2.0 mg, 5%).  $^1\text{H}$  NMR (400 MHz, Chloroform-*d*)  $\delta$  8.02 – 7.89 (m, 4H), 7.69 – 7.63 (m, 1H), 7.61 – 7.44 (m, 5H), 7.07 – 6.96 (m, 2H), 4.26 (d,  $J$  = 9.6 Hz, 1H), 3.68 – 3.57 (m, 1H), 3.55 – 3.42 (m, 1H), 3.01 – 2.84 (m, 2H), 1.00 – 0.80 (m, 3H), 0.80 – 0.71 (m, 1H), 0.47 – 0.32 (m, 1H). HRMS (ESI/Q-TOF)  $m/z$ :  $[\text{M}+\text{Na}]^+$  calcd for  $\text{C}_{22}\text{H}_{22}\text{NaO}_4\text{S}$  405.1131; found: 405.1134.

## 9. References

- [1] Lv, H.; He, X.; Shen, L.; Zhang, X.; Lian, Z. *Adv. Synth. Cat.* 2022, 364, 2729-2734.
- [2] Han, B.; Yang, X. L.; Fang, R.; Yu, W.; Wang, C.; Duan, X. Y.; Liu, S. *Angew. Chem. Int. Ed.* 2012, 51, 8816-8820.
- [3] Freihammer, P. M.; Detty, M. R. *J. Org. Chem.* 2000, 65, 7203-7207.
- [4] Leclercq, M.; Brienne, M. J. *Tetrahedron letters.* 1990, 31, 3875-3878.

## 10. NMR Spectra

### 2-(morpholinosulfonyl)-1-(p-tolyl)propan-1-one (3a)

$^1\text{H}$  NMR (400 MHz,  $\text{CDCl}_3$ )

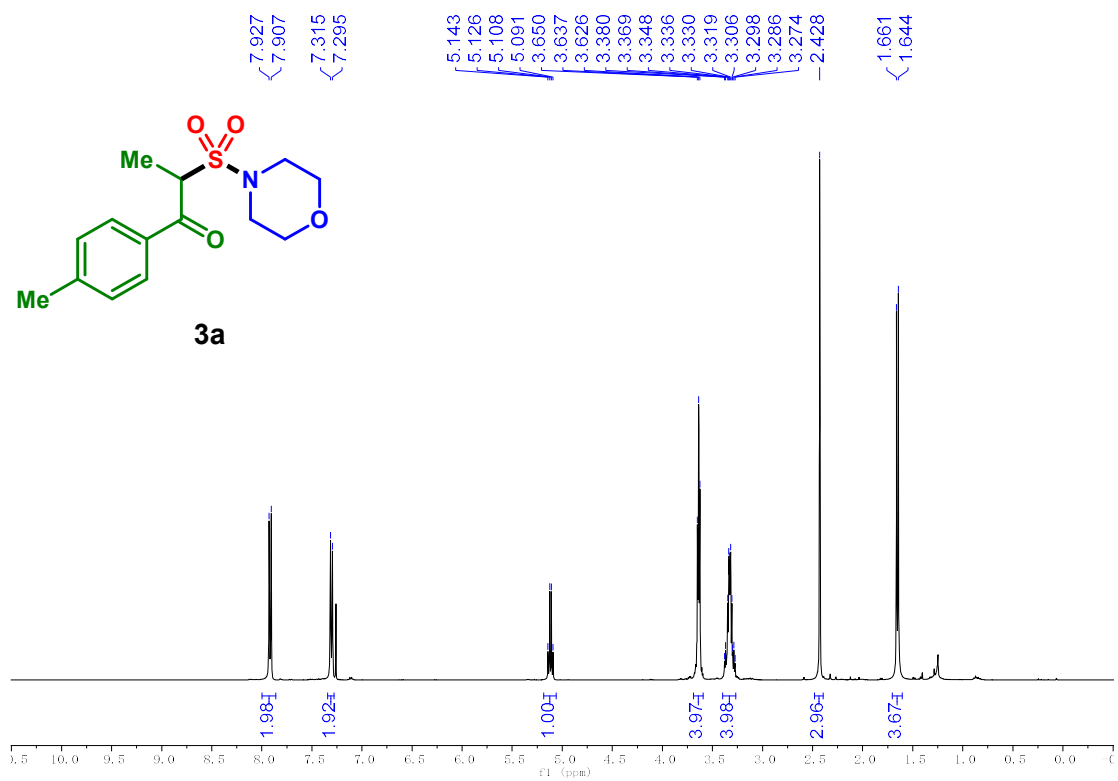

$^{13}\text{C}$  NMR (100 MHz,  $\text{CDCl}_3$ )

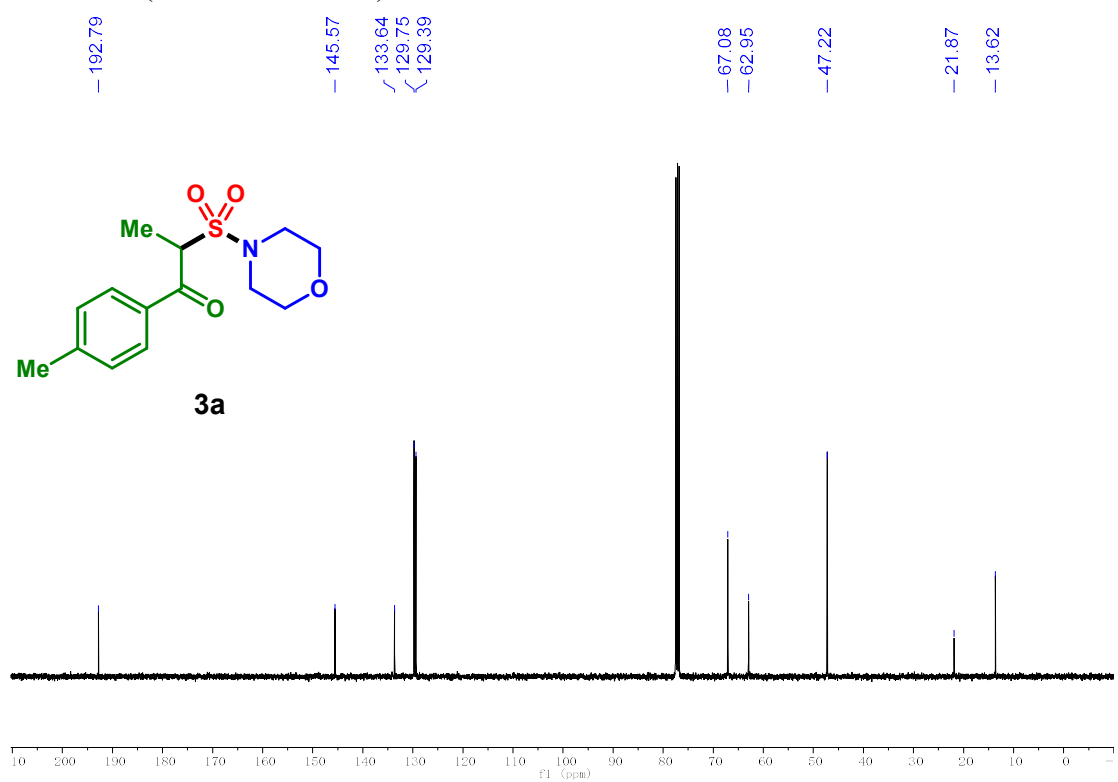

## 2-(morpholinosulfonyl)-1-(m-tolyl)propan-1-one (3b)

$^1\text{H}$  NMR (400 MHz,  $\text{CDCl}_3$ )

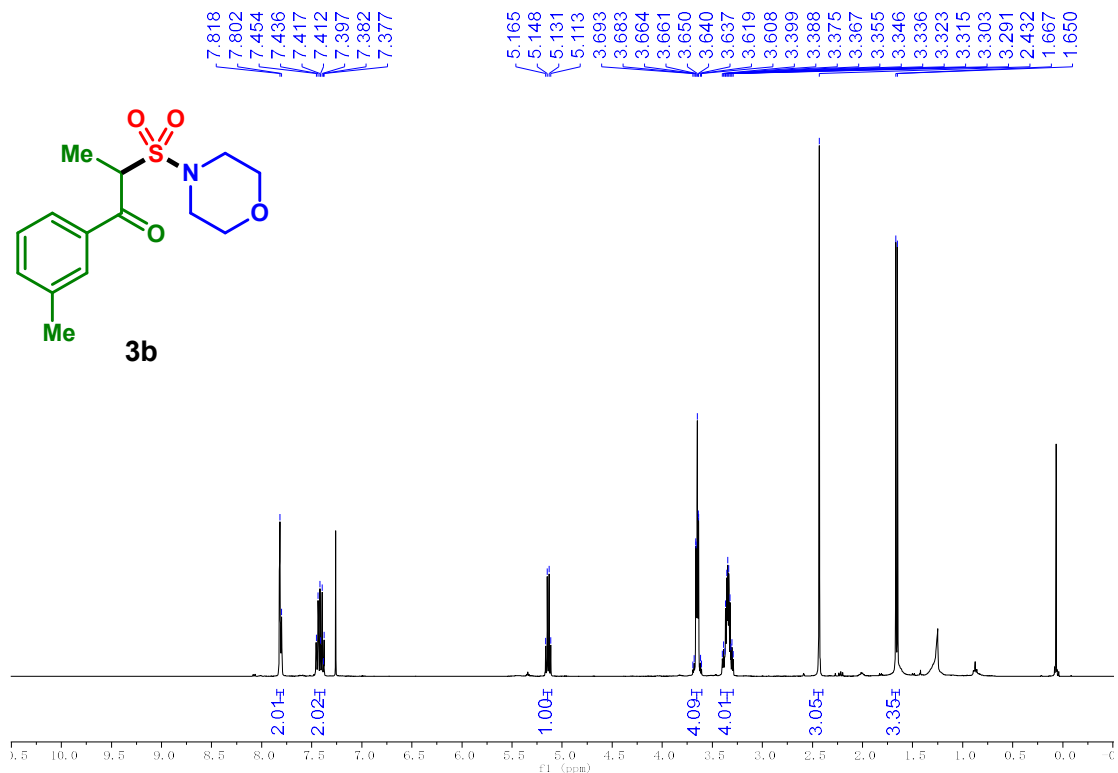

$^{13}\text{C}$  NMR (100 MHz,  $\text{CDCl}_3$ )

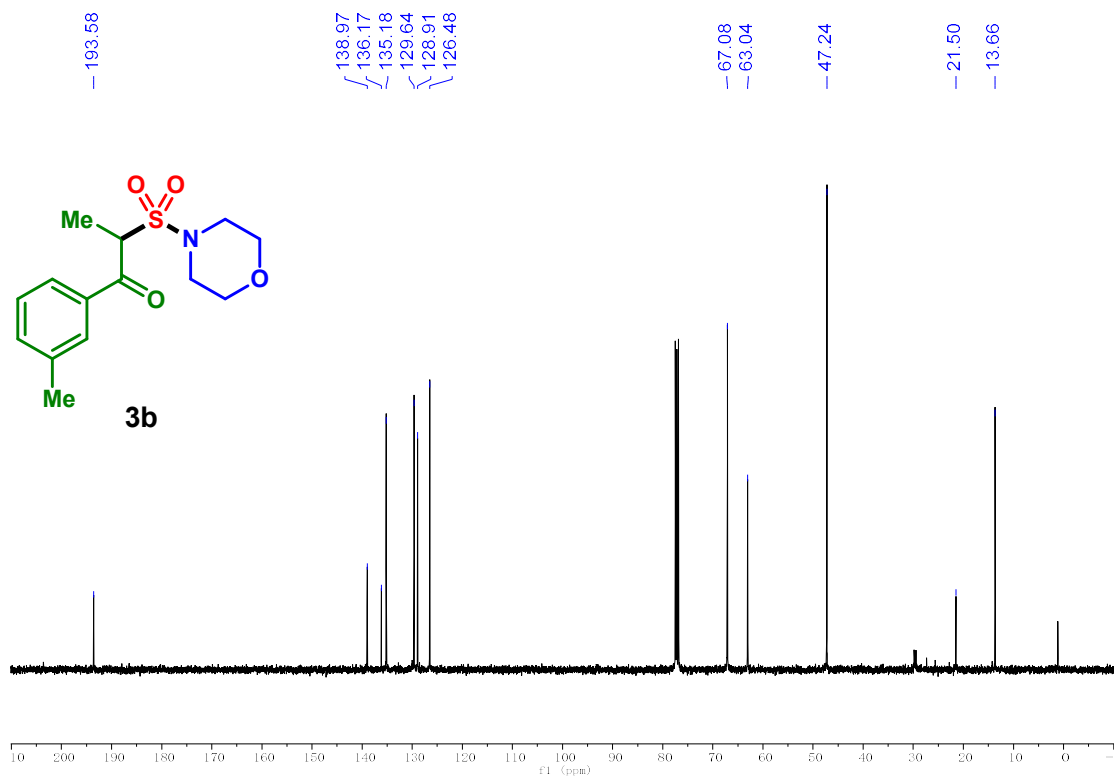

# 1-(4-methoxyphenyl)-2-(morpholin sulfonyl)propan-1-one (3c)

<sup>1</sup>H NMR (400 MHz, CDCl<sub>3</sub>)

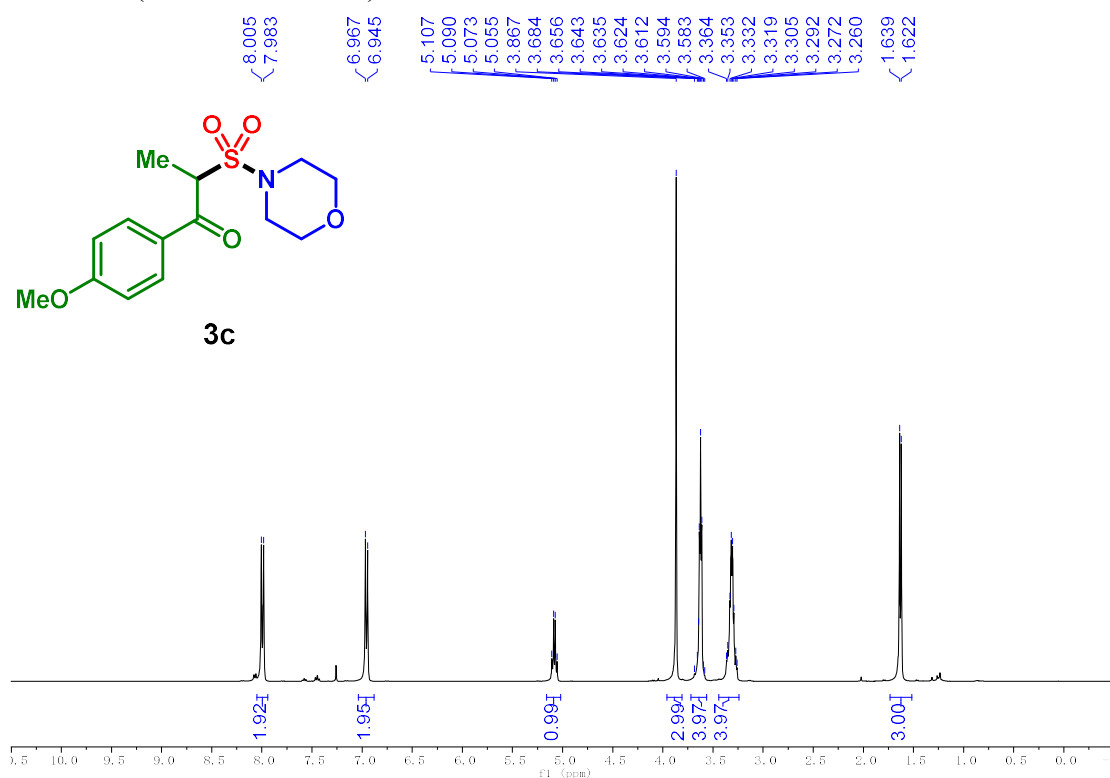

<sup>13</sup>C NMR (100 MHz, CDCl<sub>3</sub>)

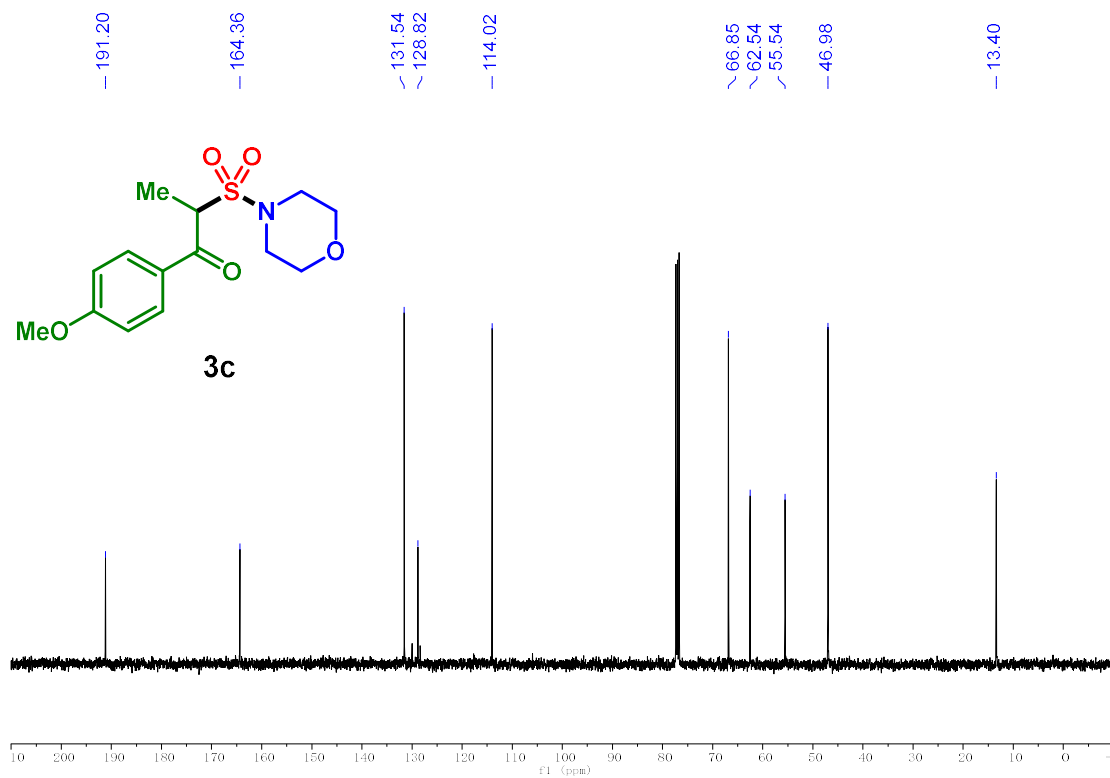



# 1-([1,1'-biphenyl]-4-yl)-2-(morpholinosulfonyl)butan-1-one (3d)

<sup>1</sup>H NMR (400 MHz, CDCl<sub>3</sub>)

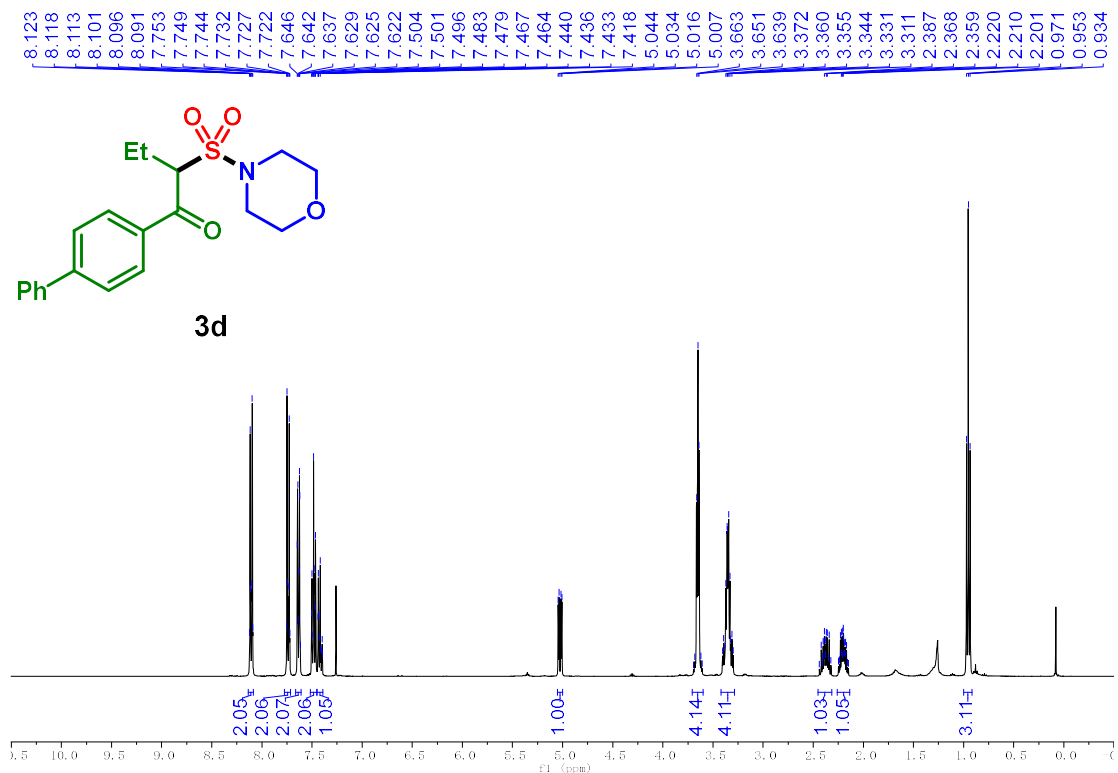

<sup>13</sup>C NMR (100 MHz, CDCl<sub>3</sub>)

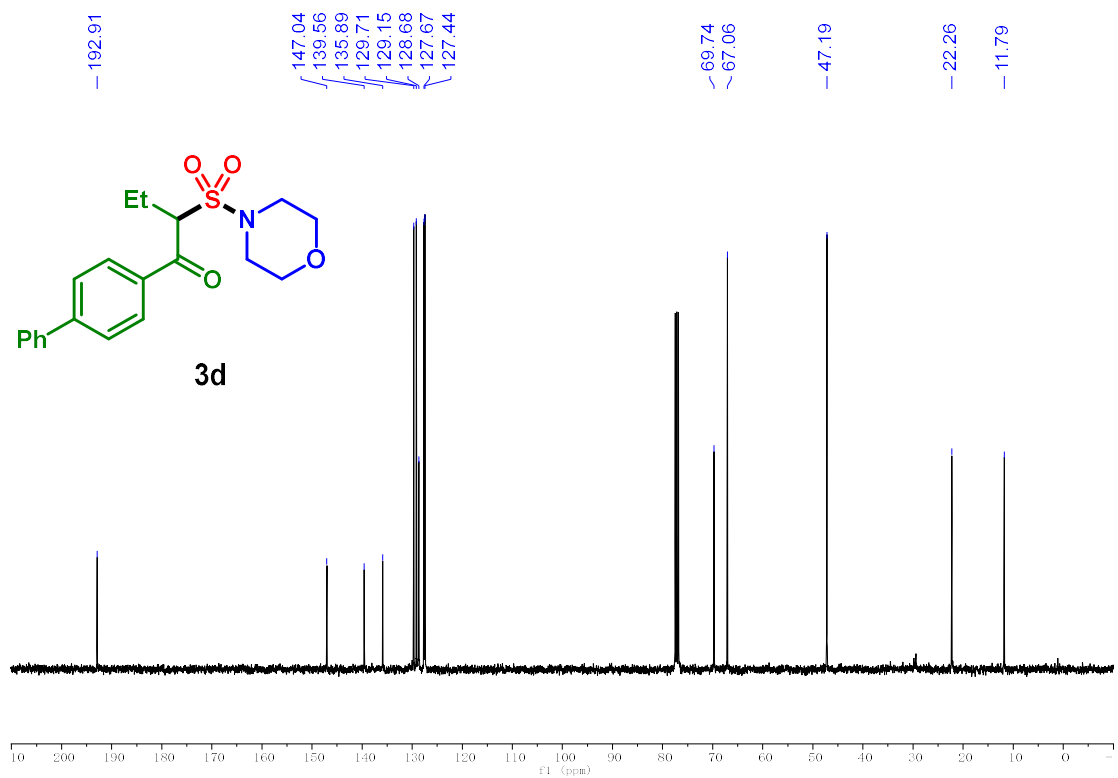

# 1-(4-fluorophenyl)-2-(morpholinosulfonyl)propan-1-one (3e)

$^1\text{H}$  NMR (400 MHz,  $\text{CDCl}_3$ )

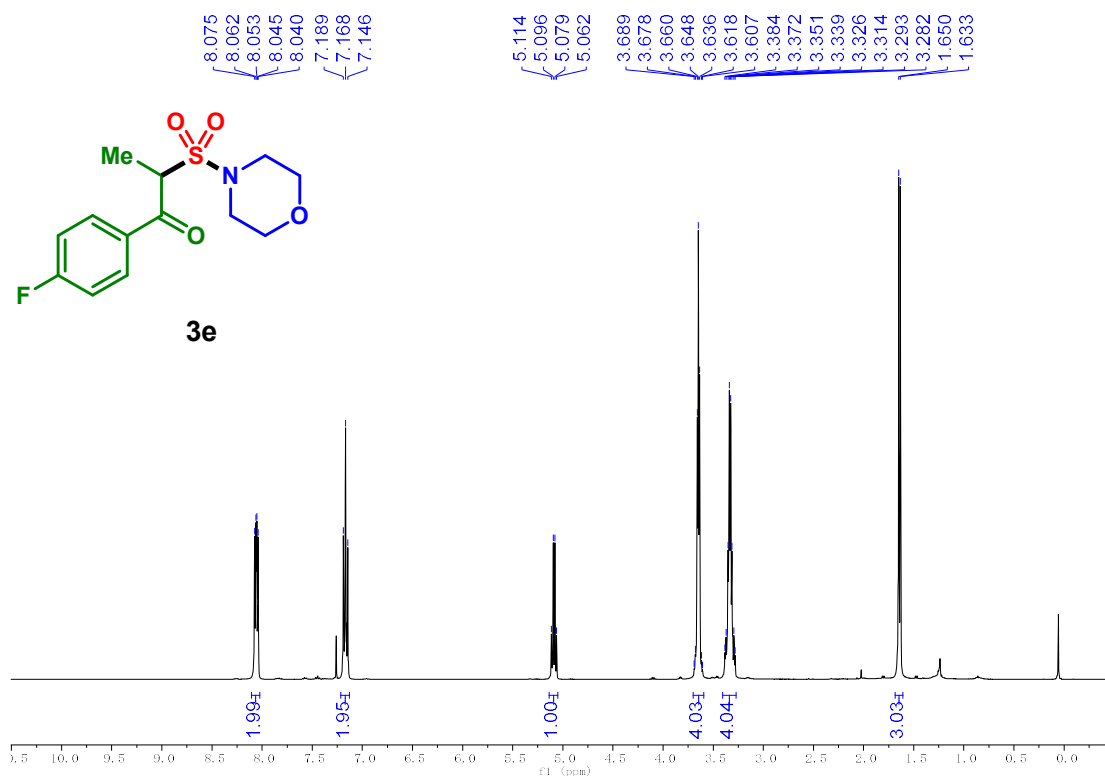

$^{19}\text{F}$  NMR (376 MHz,  $\text{CDCl}_3$ )

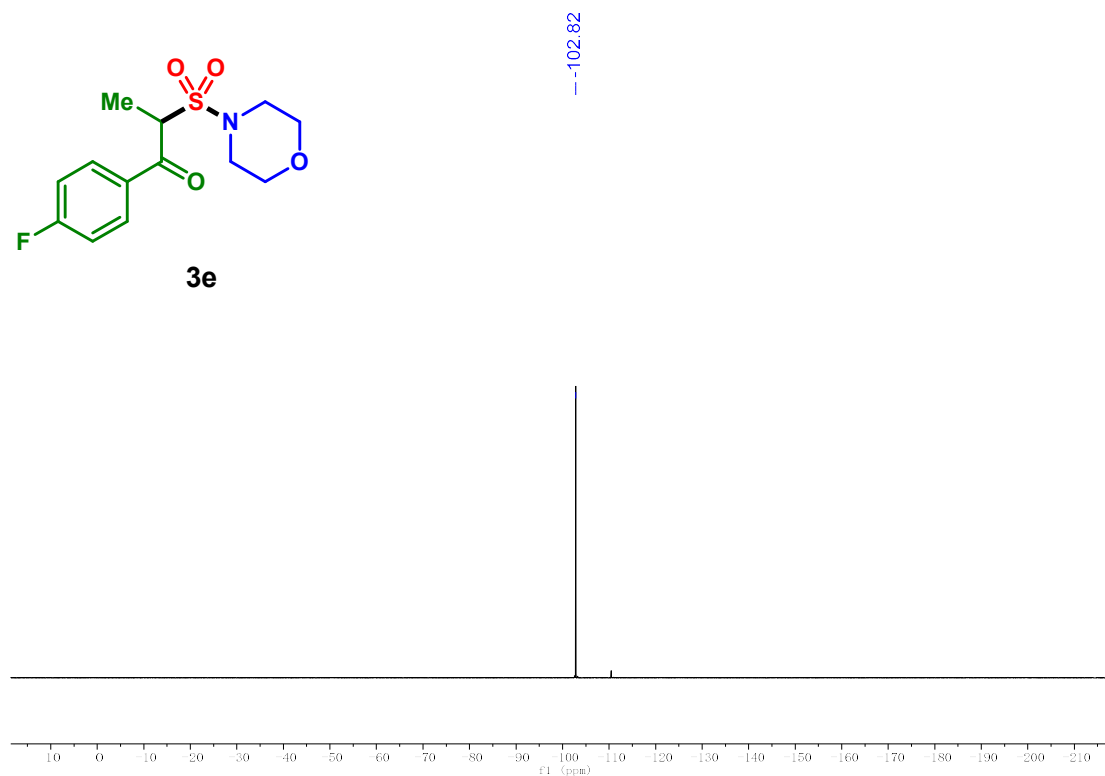

$^{13}\text{C}$  NMR (100 MHz,  $\text{CDCl}_3$ )

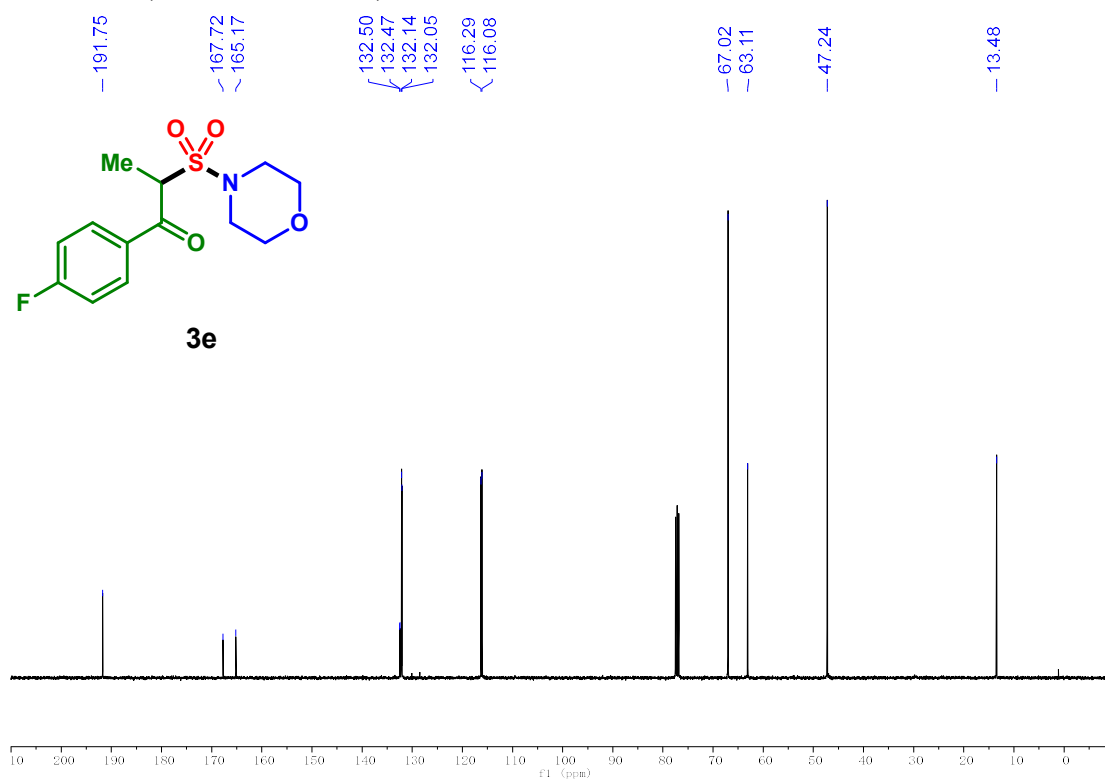

# 1-(4-chlorophenyl)-2-(morpholinosulfonyl)propan-1-one (3f)

$^1\text{H}$  NMR (400 MHz,  $\text{CDCl}_3$ )

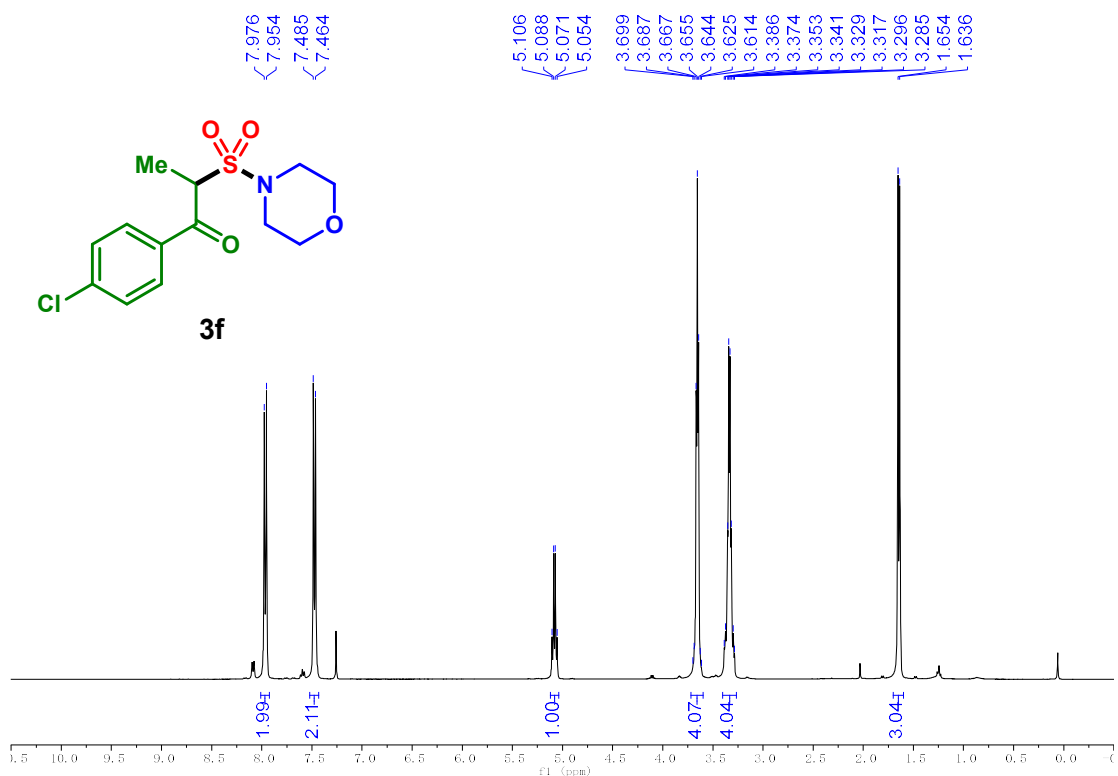

$^{13}\text{C}$  NMR (100 MHz,  $\text{CDCl}_3$ )

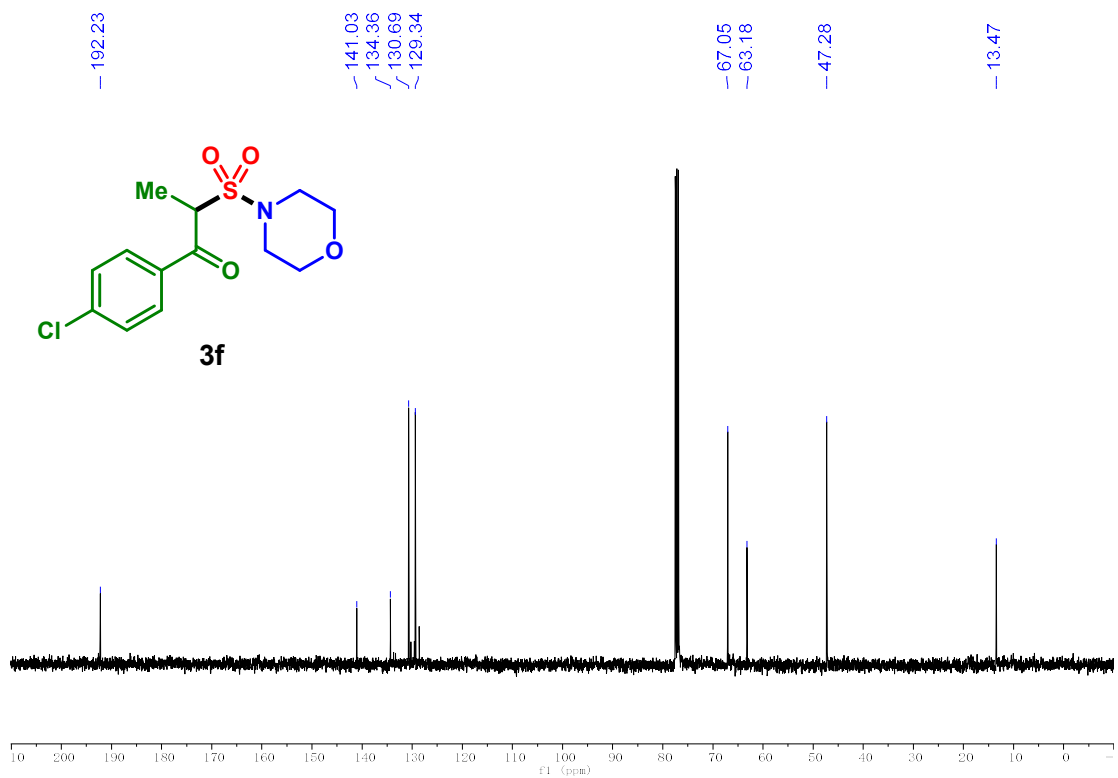

# 1-(4-bromophenyl)-2-(morpholinosulfonyl)propan-1-one (3g)

<sup>1</sup>H NMR (400 MHz, CDCl<sub>3</sub>)

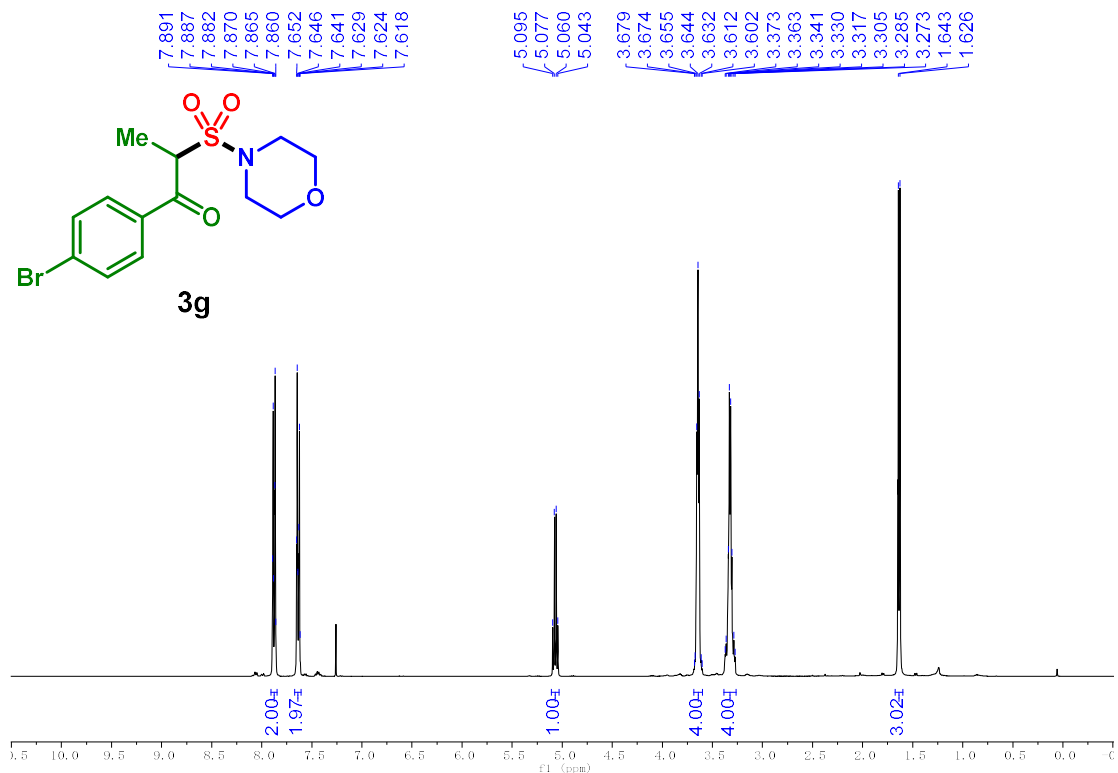

<sup>13</sup>C NMR (100 MHz, CDCl<sub>3</sub>)

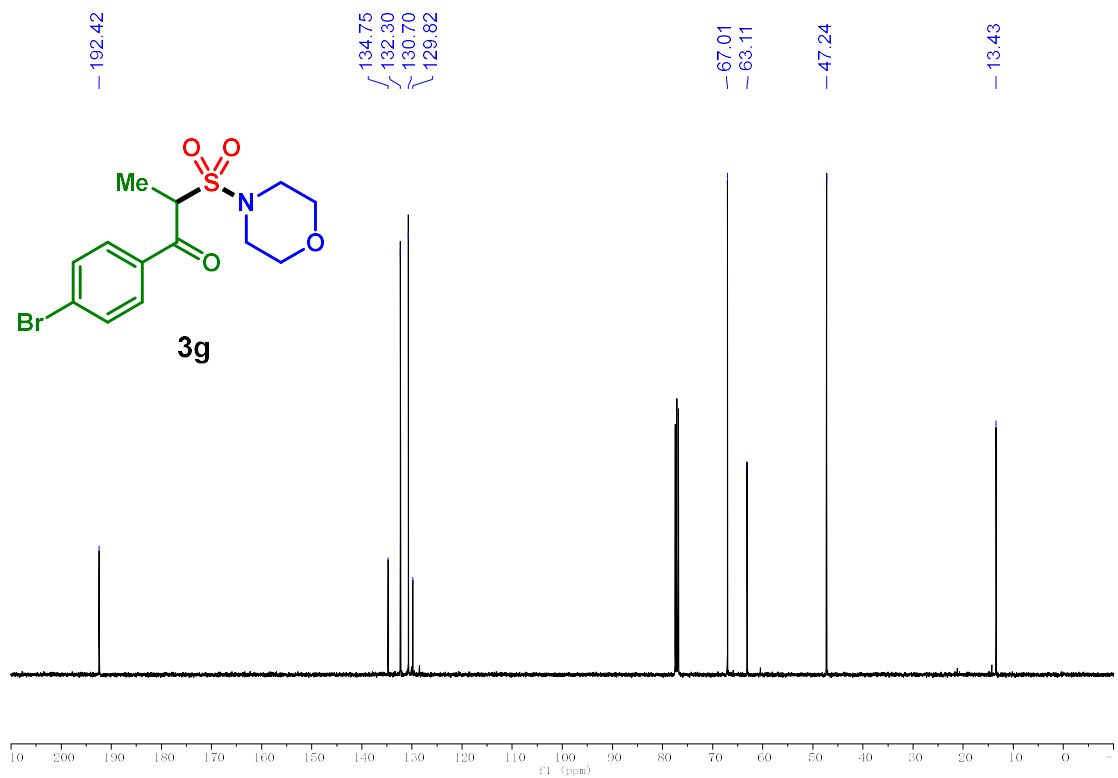

## 2-(morpholinosulfonyl)-1-(4-(trifluoromethyl)phenyl)propan-1-one (3h)

$^1\text{H}$  NMR (400 MHz,  $\text{CDCl}_3$ )

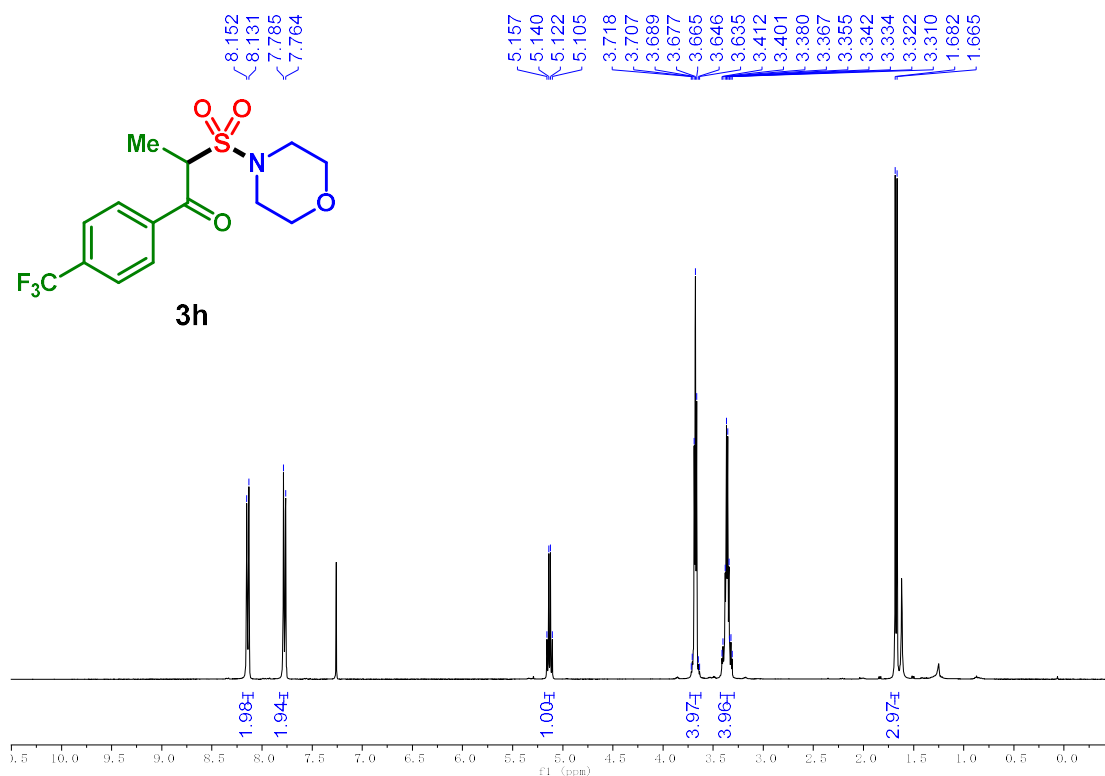

$^{19}\text{F}$  NMR (376 MHz,  $\text{CDCl}_3$ )

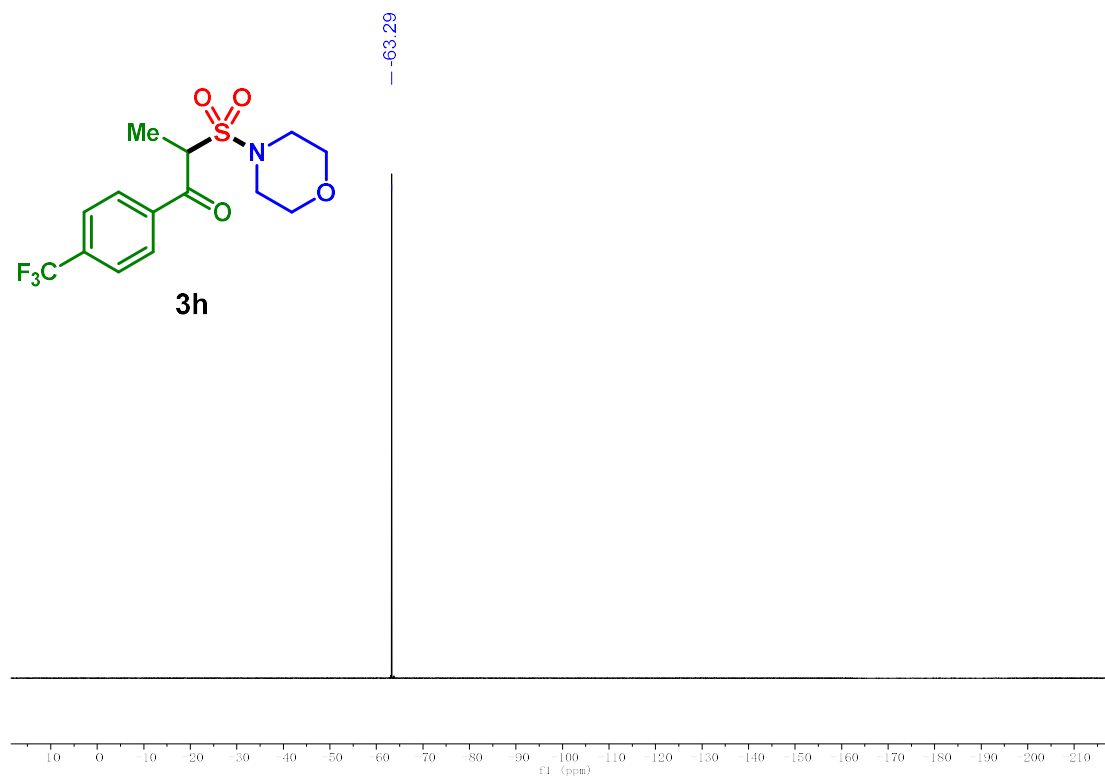

$^{13}\text{C}$  NMR (100 MHz,  $\text{CDCl}_3$ )

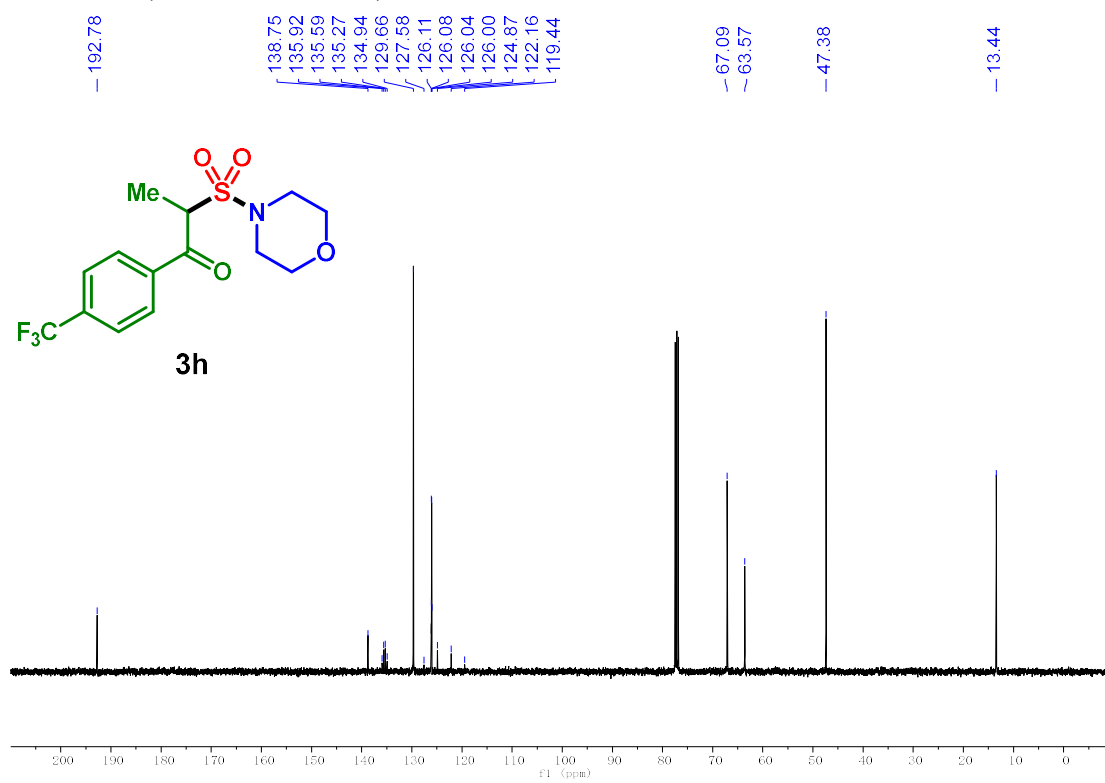

### (E)-1-(morpholinylsulfonyl)-4-phenylbut-3-en-2-one (3i)

$^1\text{H}$  NMR (400 MHz,  $\text{CDCl}_3$ )

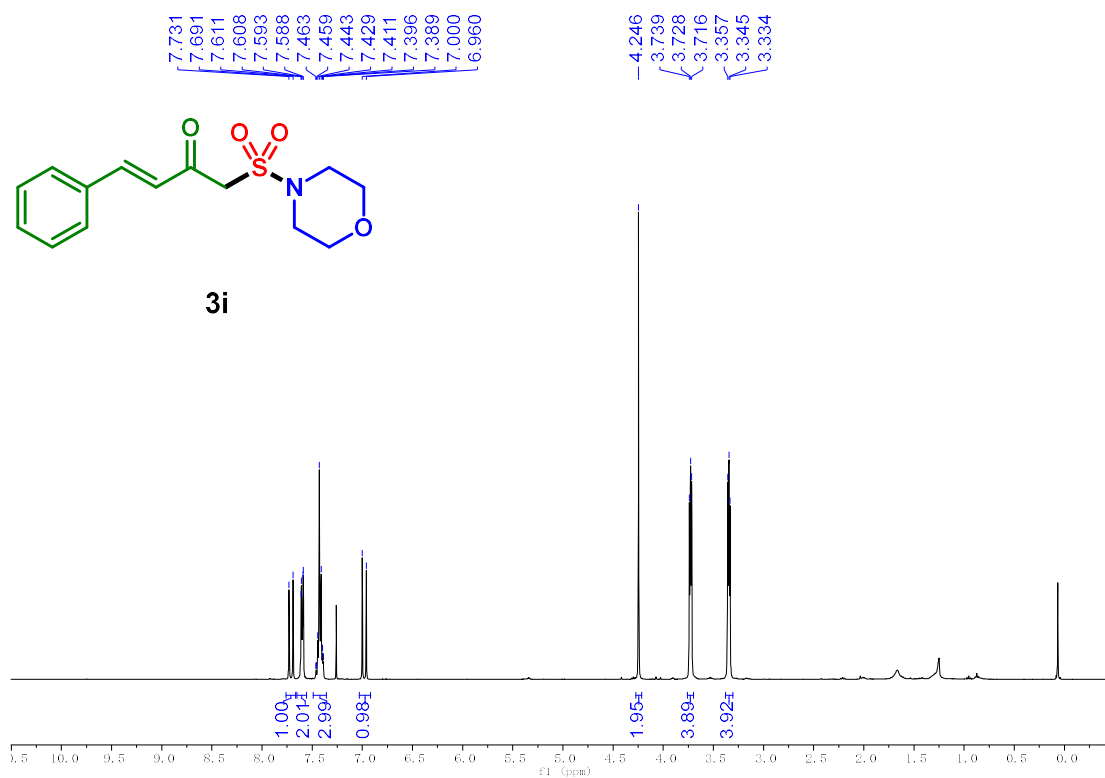

$^{13}\text{C}$  NMR (100 MHz,  $\text{CDCl}_3$ )

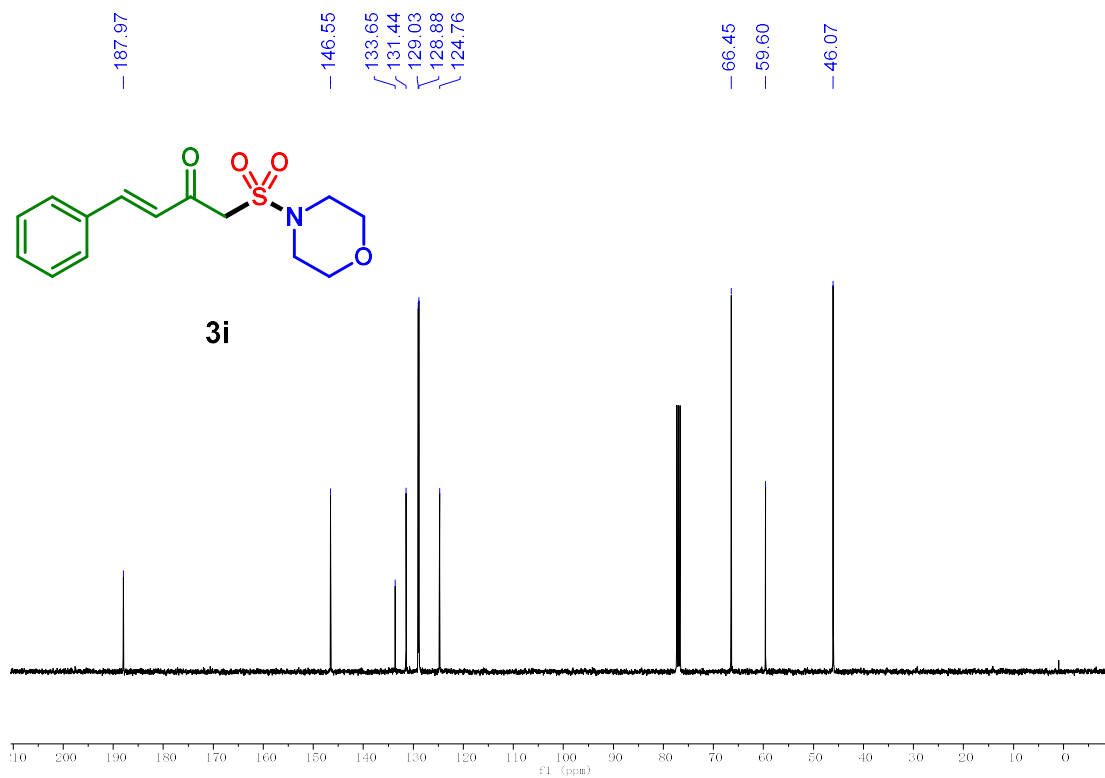



## 2-(morpholinosulfonyl)-1-(pyridin-3-yl)propan-1-one (3j)

$^1\text{H}$  NMR (400 MHz,  $\text{CDCl}_3$ )

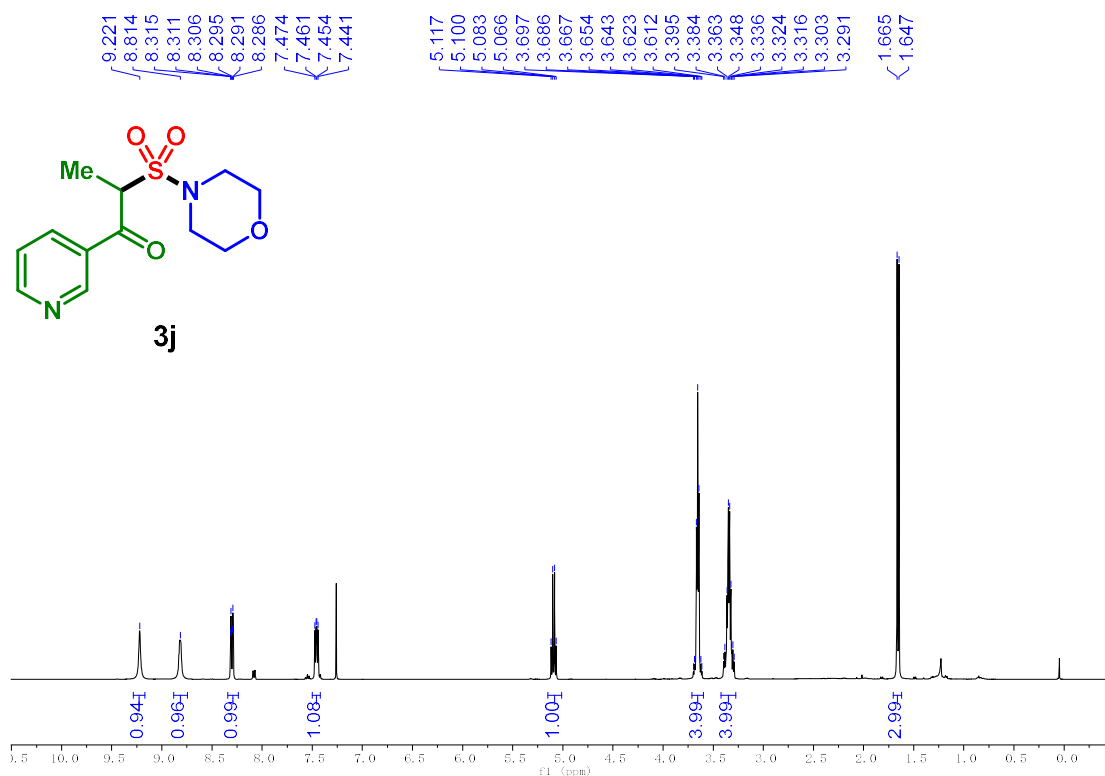

$^{13}\text{C}$  NMR (100 MHz,  $\text{CDCl}_3$ )

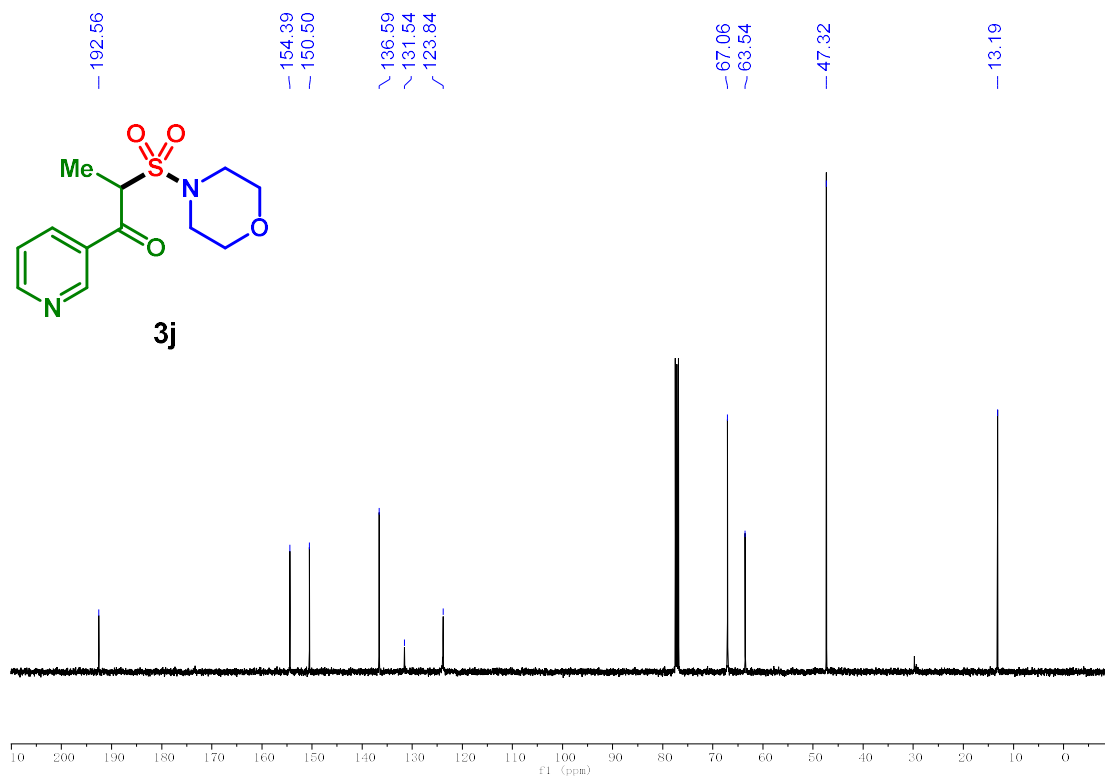

# 1-(5-methylfuran-2-yl)-2-(morpholinosulfonyl)propan-1-one (3k)

$^1\text{H}$  NMR (400 MHz,  $\text{CDCl}_3$ )

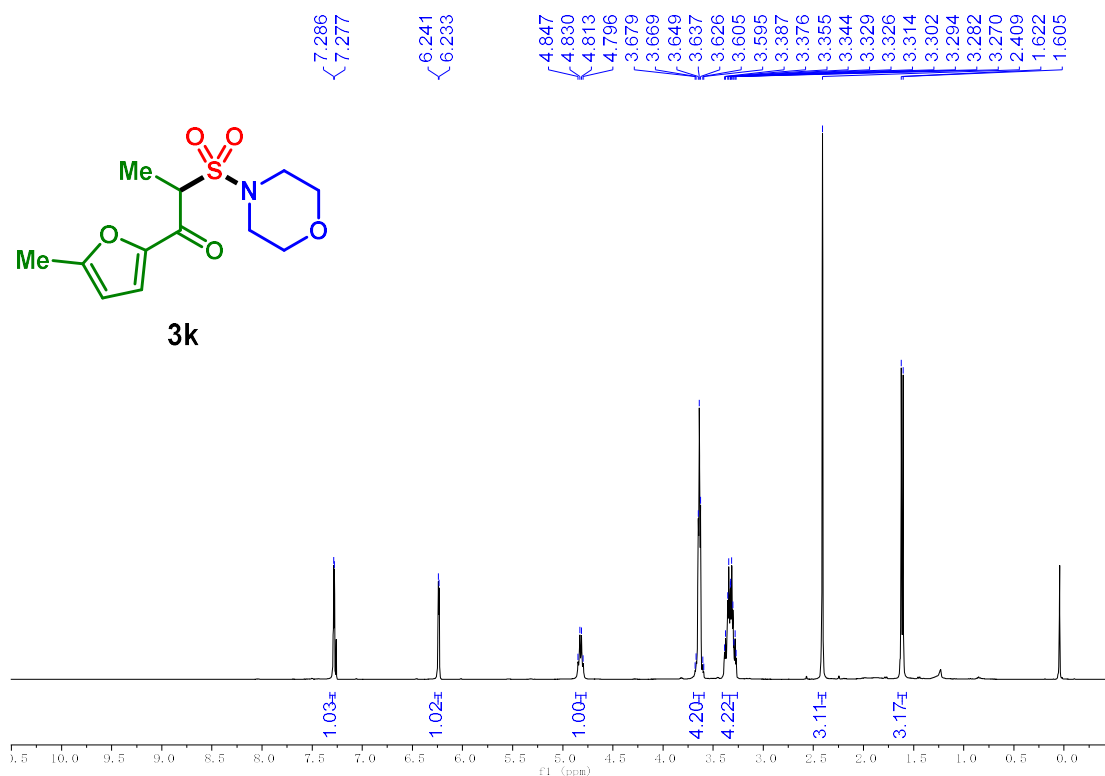

$^{13}\text{C}$  NMR (100 MHz,  $\text{CDCl}_3$ )

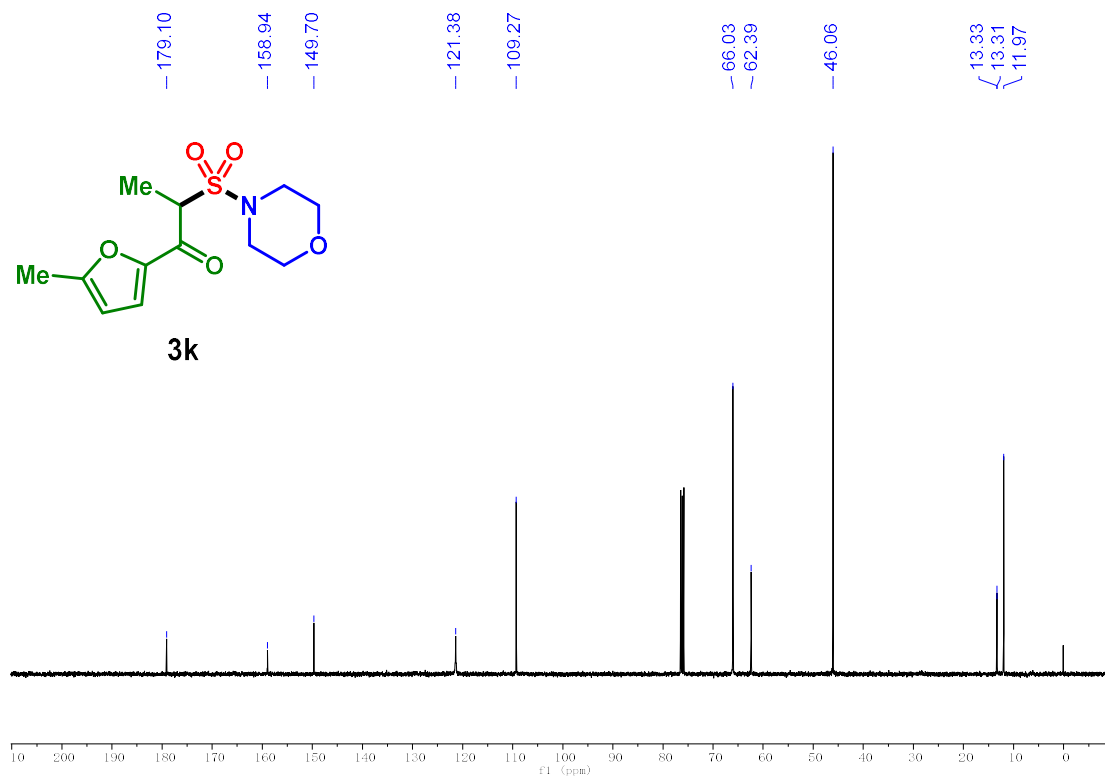

## 2-(morpholinosulfonyl)-1-(thiophen-2-yl)propan-1-one (31)

$^1\text{H}$  NMR (400 MHz,  $\text{CDCl}_3$ )

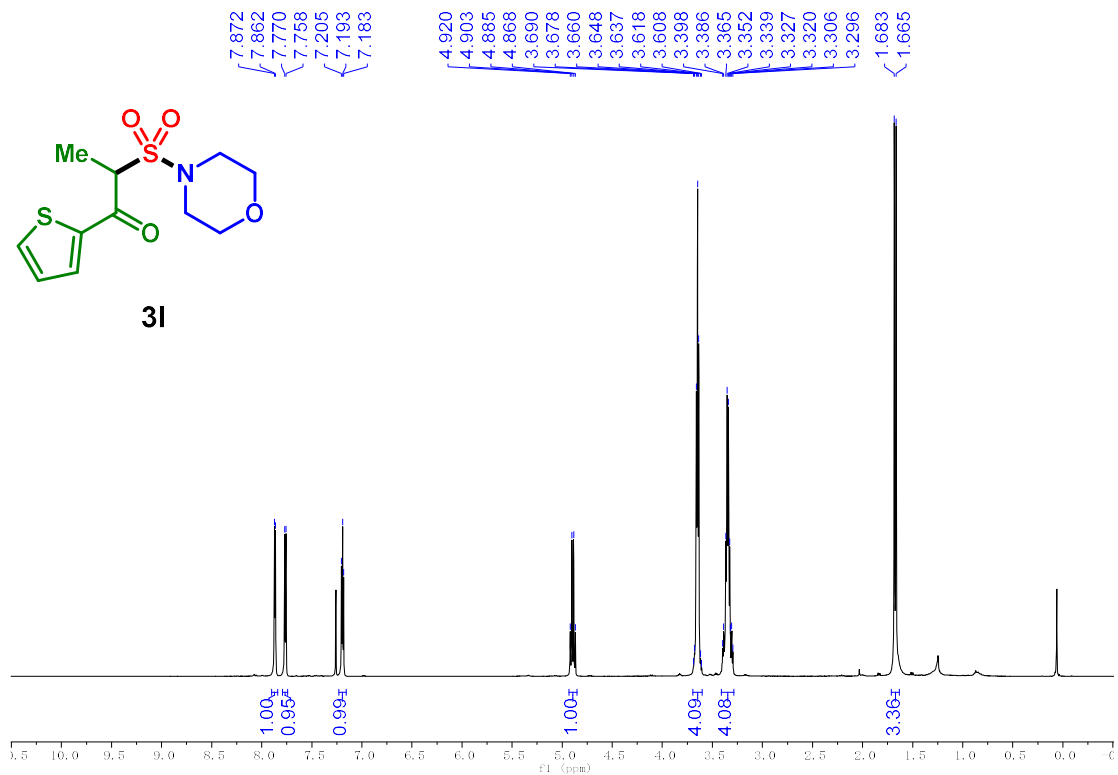

$^{13}\text{C}$  NMR (100 MHz,  $\text{CDCl}_3$ )

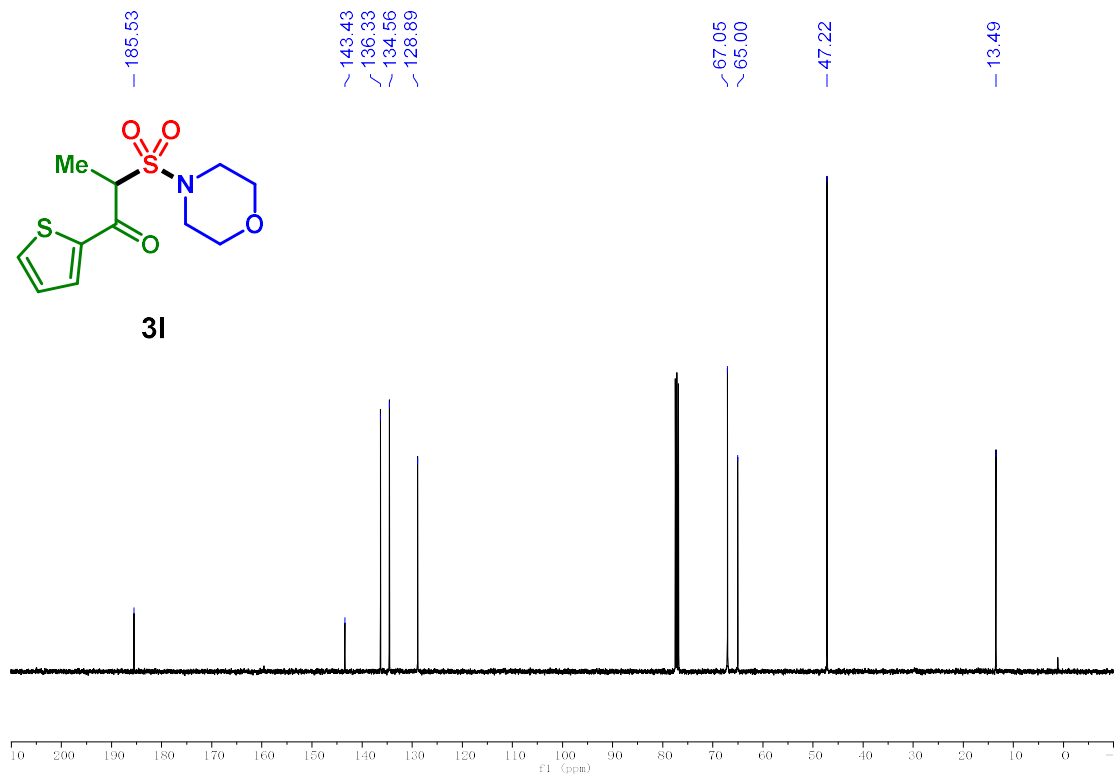

## 2-(morpholinosulfonyl)-1-phenylethan-1-one (3m)

$^1\text{H}$  NMR (400 MHz,  $\text{CDCl}_3$ )

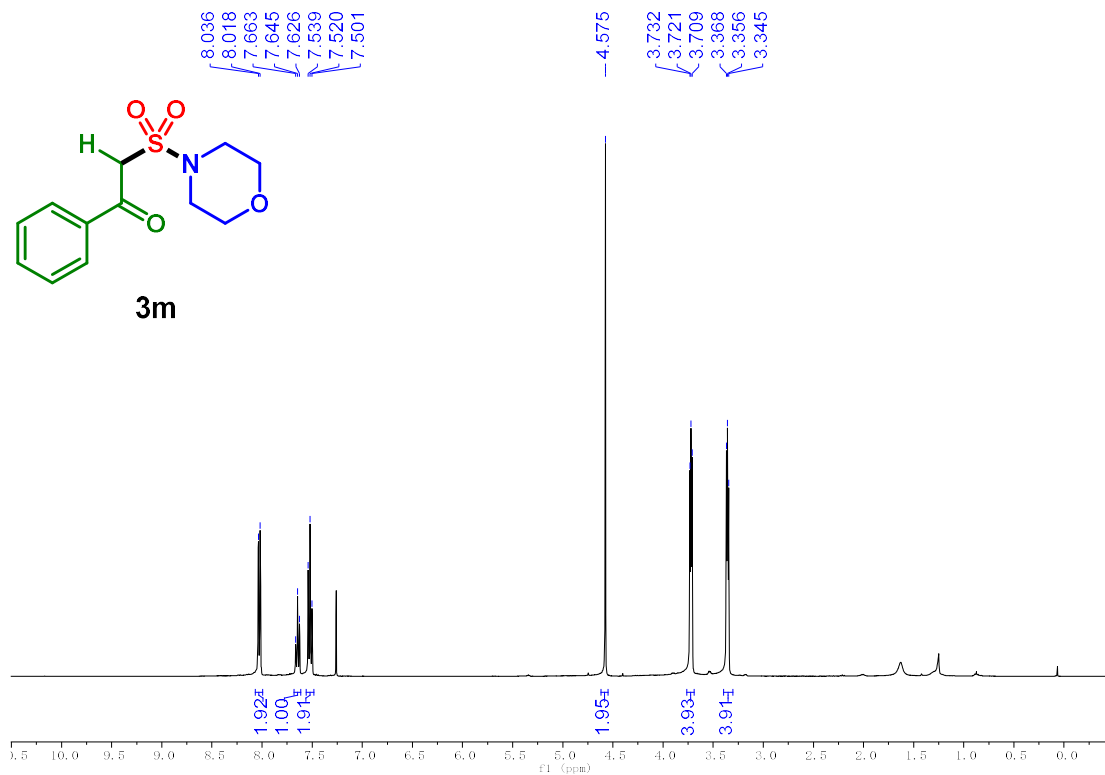

$^{13}\text{C}$  NMR (100 MHz,  $\text{CDCl}_3$ )

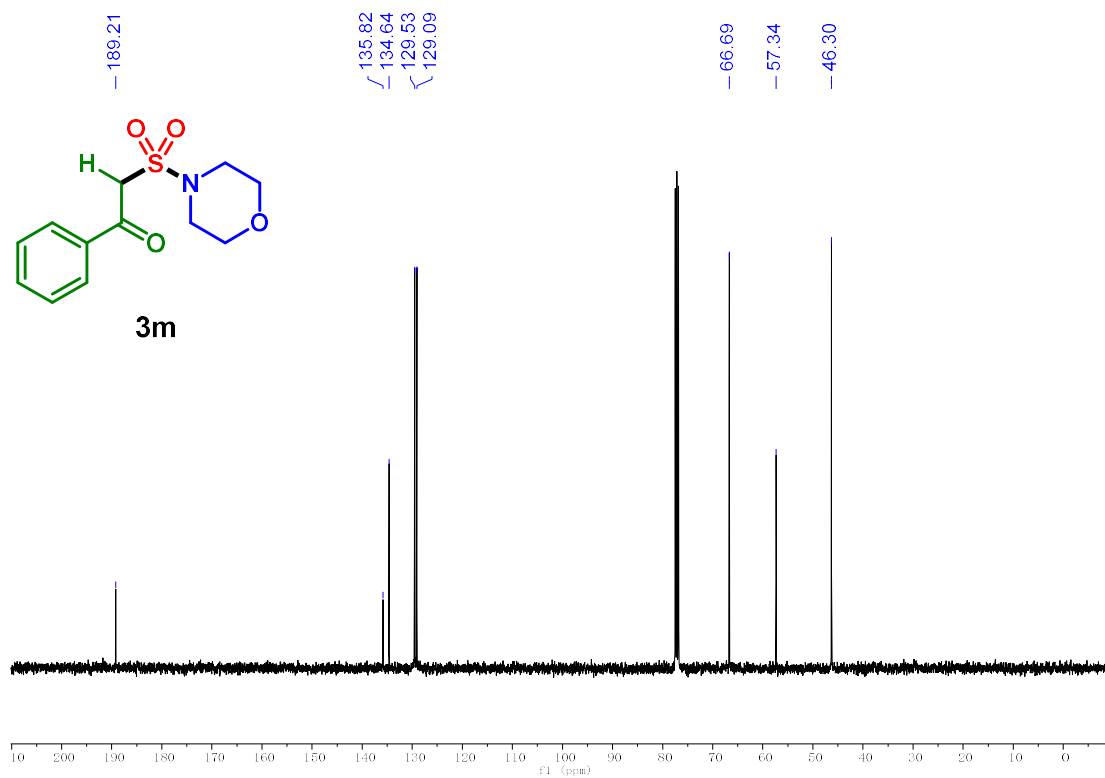

## 2-(morpholinosulfonyl)-1-phenylbutan-1-one (3n)

$^1\text{H}$  NMR (400 MHz,  $\text{CDCl}_3$ )

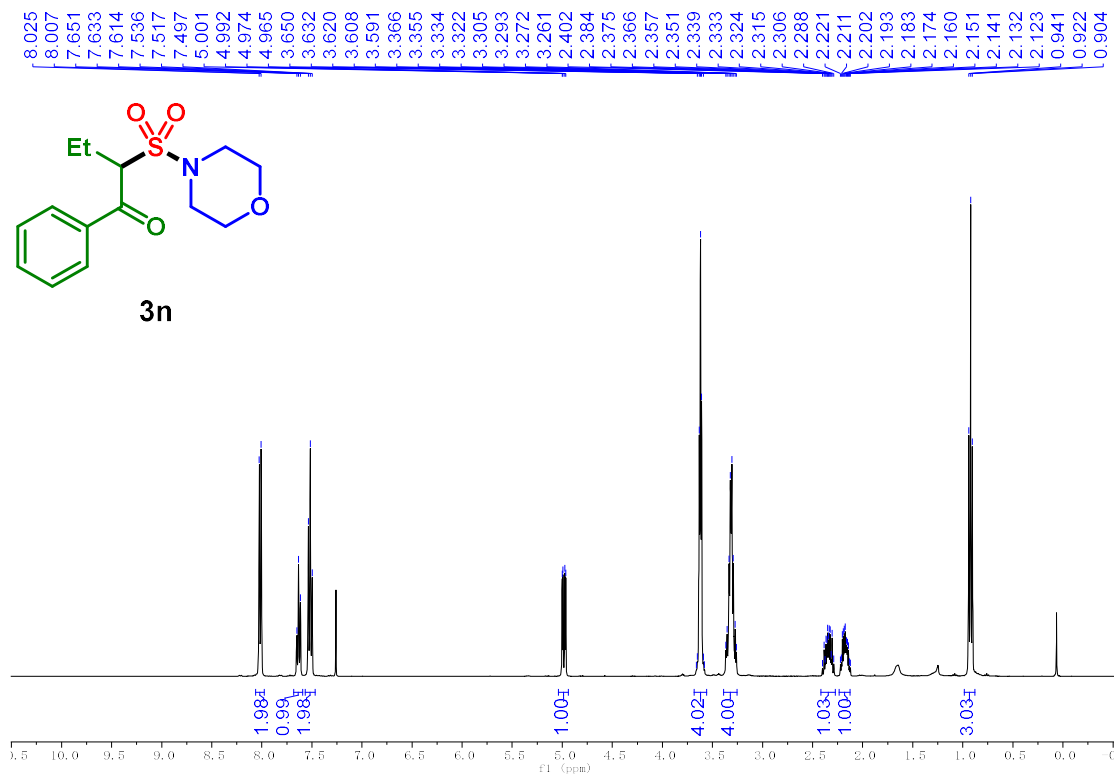

$^{13}\text{C}$  NMR (100 MHz,  $\text{CDCl}_3$ )

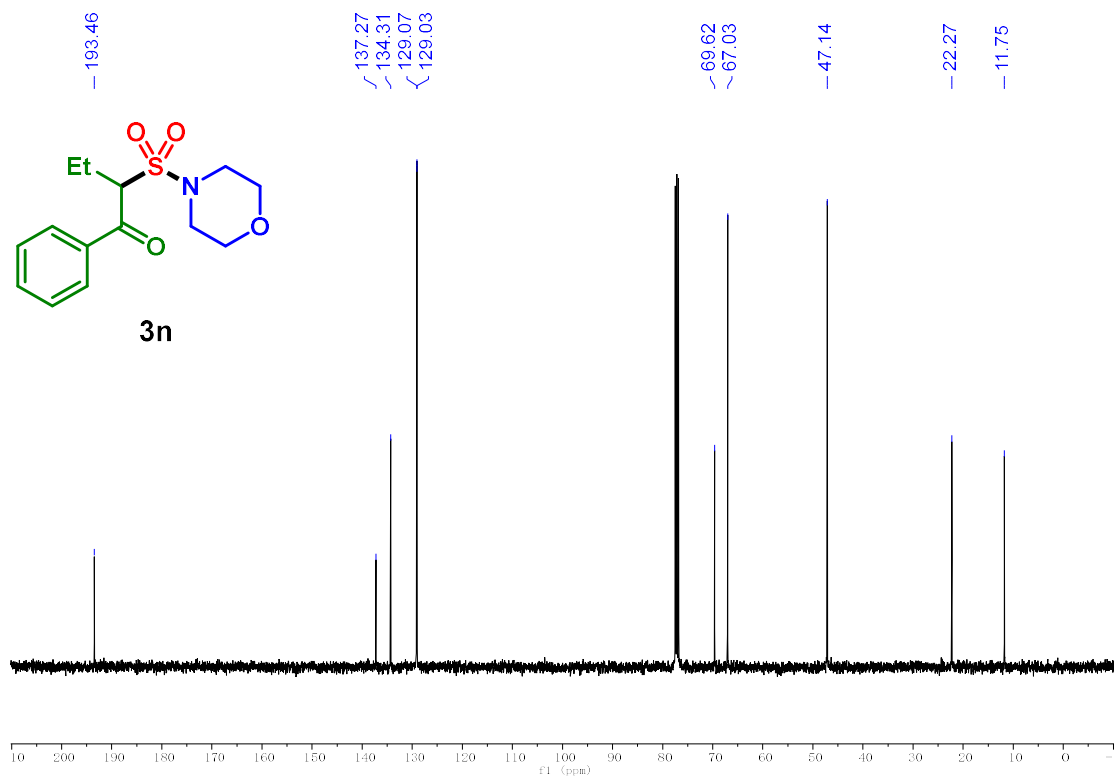

## 2-(morpholinosulfonyl)-1-phenylpentan-1-one (3o)

$^1\text{H}$  NMR (400 MHz,  $\text{CDCl}_3$ )

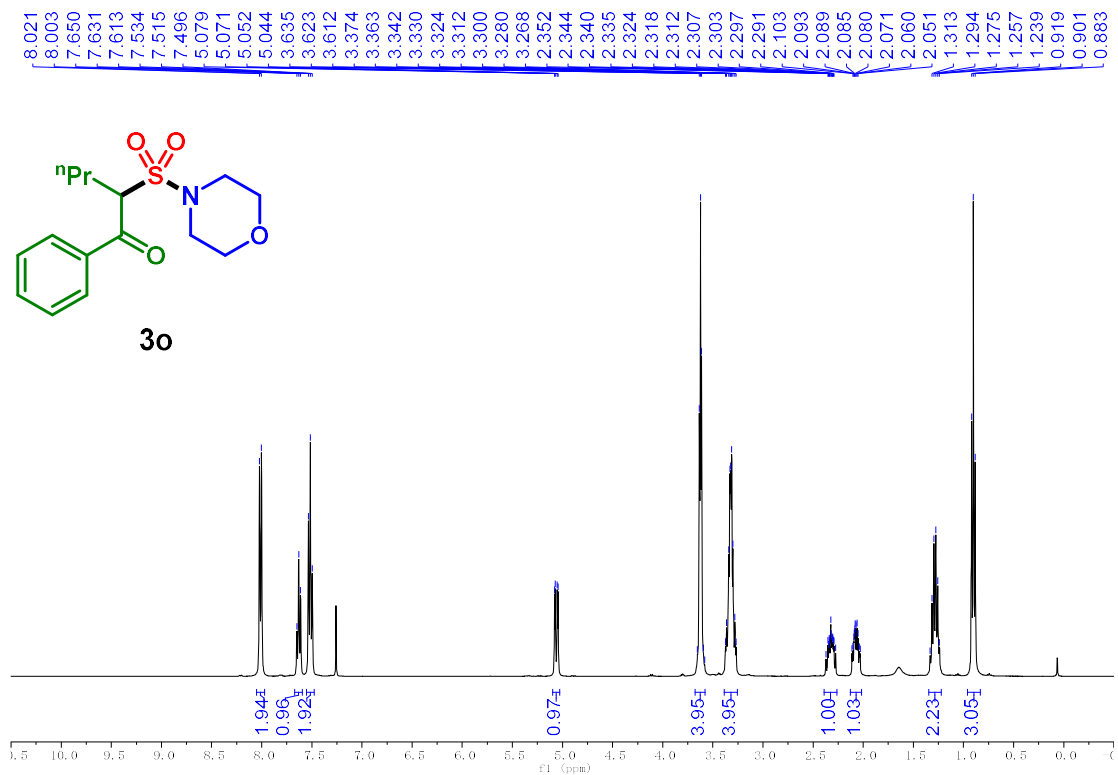

$^{13}\text{C}$  NMR (100 MHz,  $\text{CDCl}_3$ )

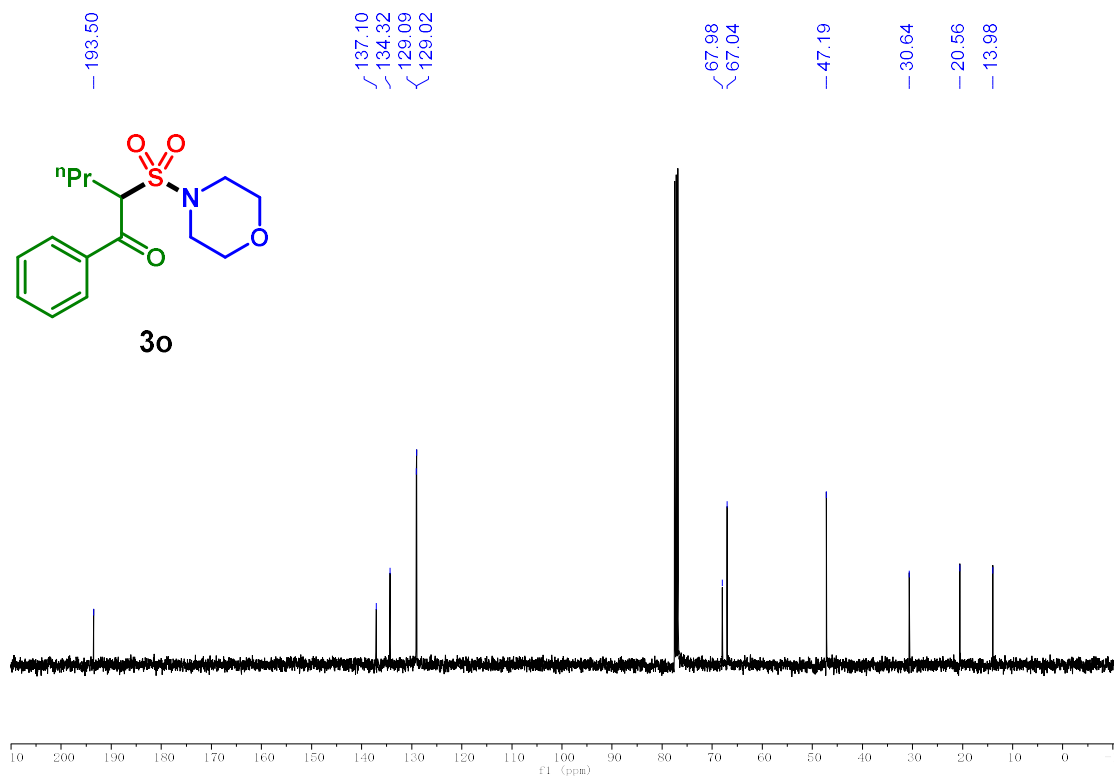

## 2-cyclopropyl-2-(morpholinofonyl)-1-phenylethan-1-one (3p)

$^1\text{H}$  NMR (400 MHz,  $\text{CDCl}_3$ )

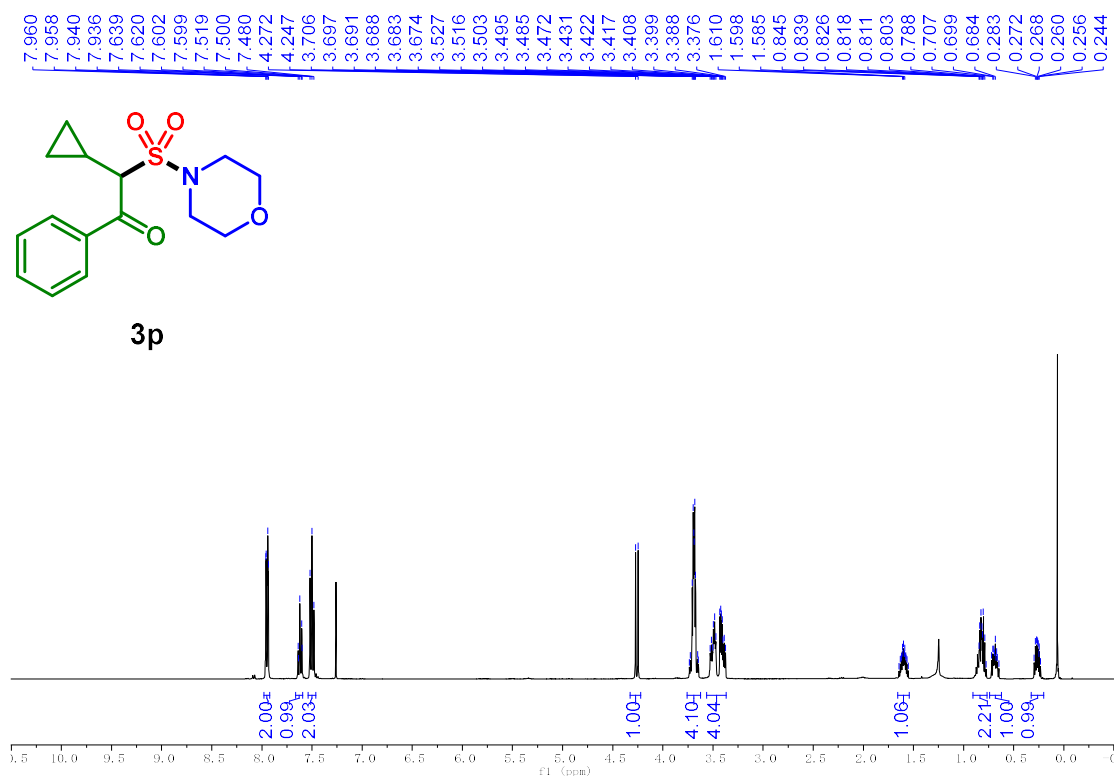

$^{13}\text{C}$  NMR (100 MHz,  $\text{CDCl}_3$ )

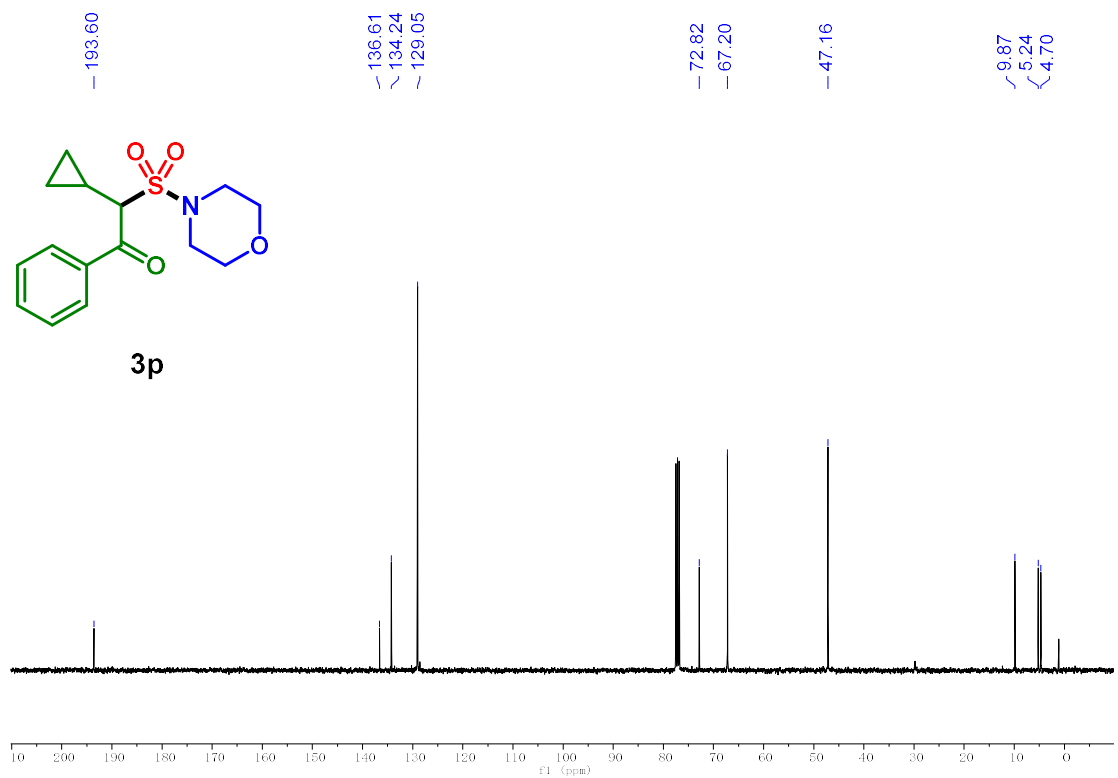

### 4-chloro-2-(morpholinosulfonyl)-1-phenylbutan-1-one (3q)

$^1\text{H}$  NMR (400 MHz,  $\text{CDCl}_3$ )

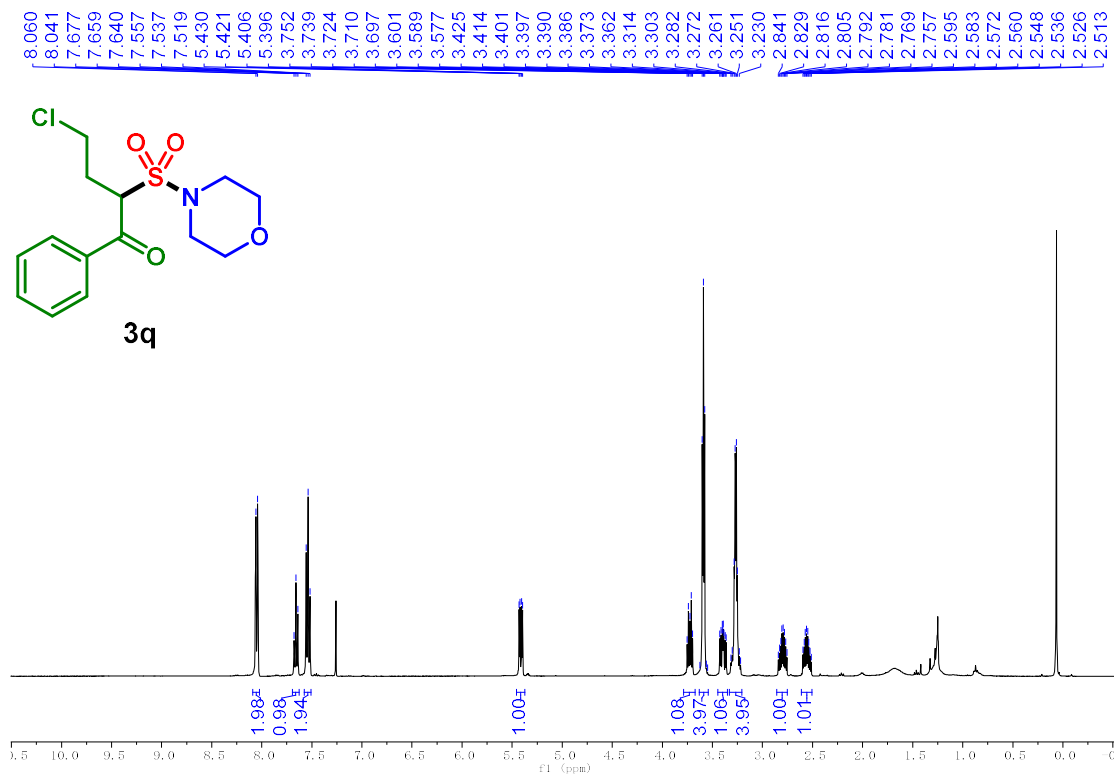

$^{13}\text{C}$  NMR (100 MHz,  $\text{CDCl}_3$ )

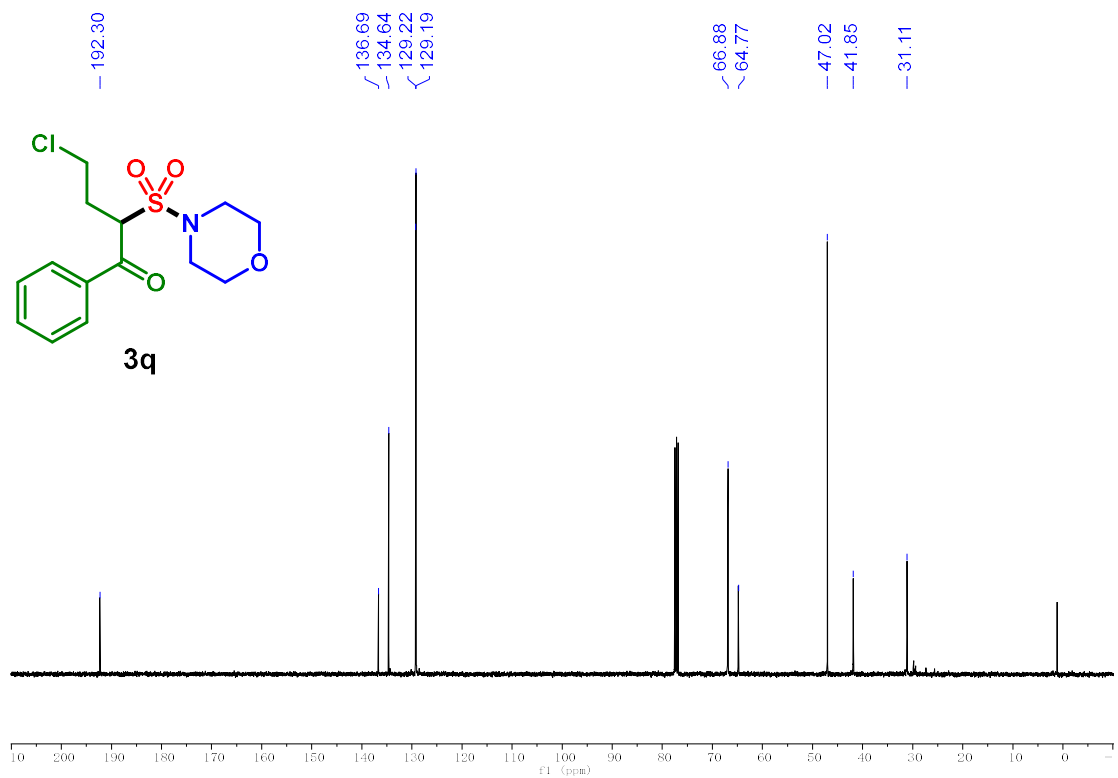



### methyl 3-(morpholinosulfonyl)-4-oxo-4-phenylbutanoate (3r)

$^1\text{H}$  NMR (400 MHz,  $\text{CDCl}_3$ )

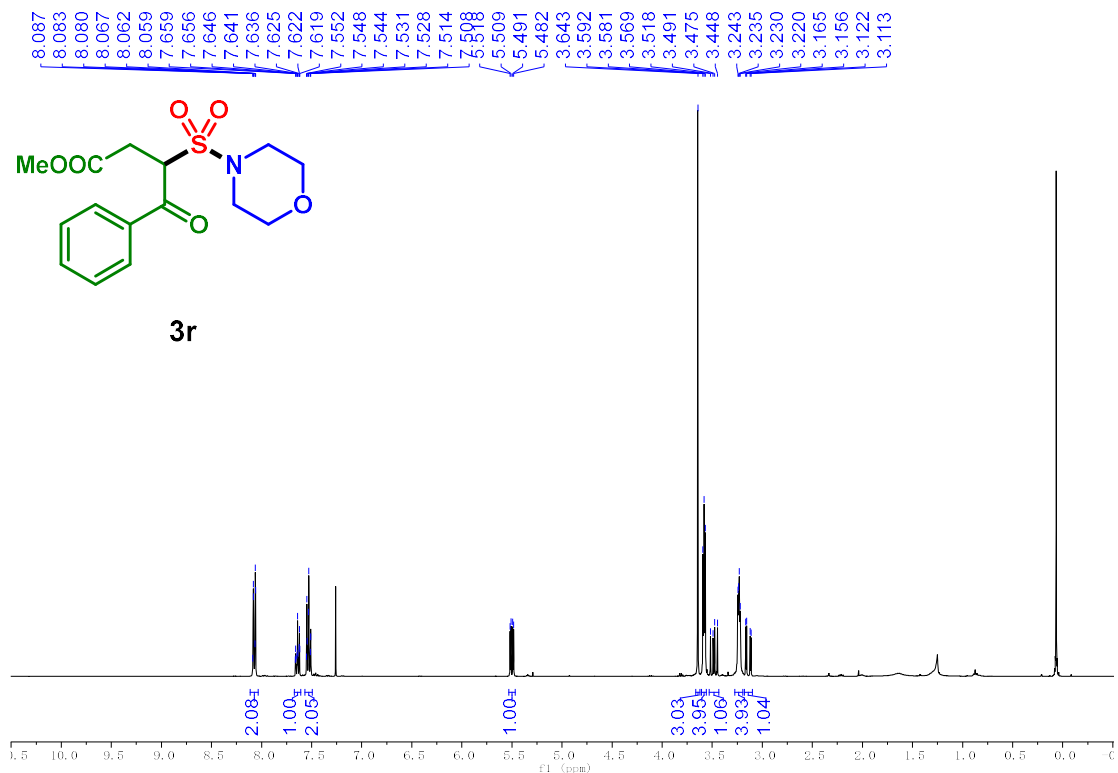

$^{13}\text{C}$  NMR (100 MHz,  $\text{CDCl}_3$ )

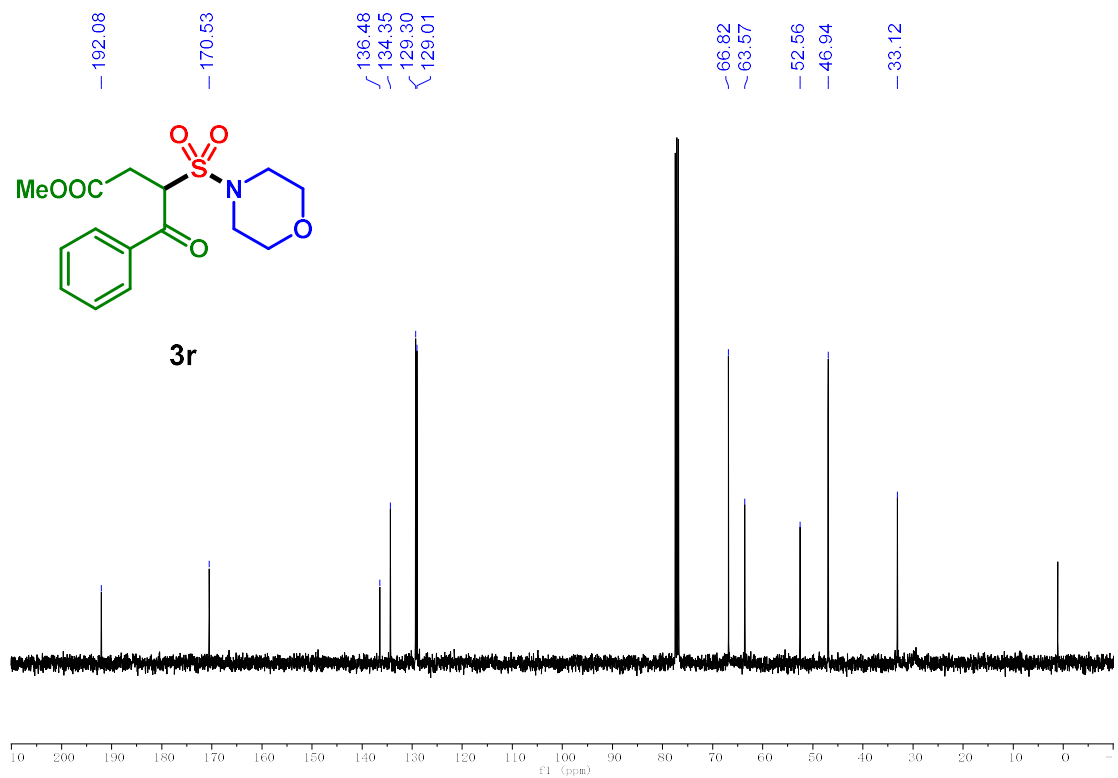

## 2-(morpholinosulfonyl)-1,3-diphenylpropan-1-one (3s)

$^1\text{H}$  NMR (400 MHz,  $\text{CDCl}_3$ )

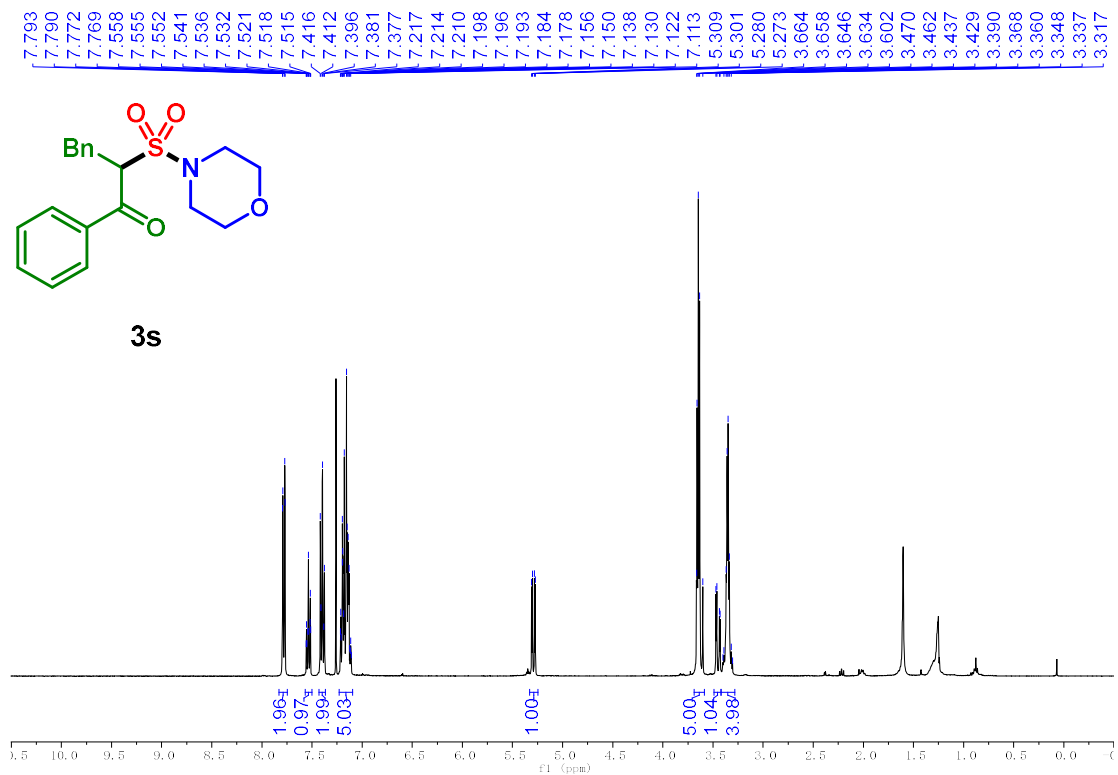

$^{13}\text{C}$  NMR (100 MHz,  $\text{CDCl}_3$ )

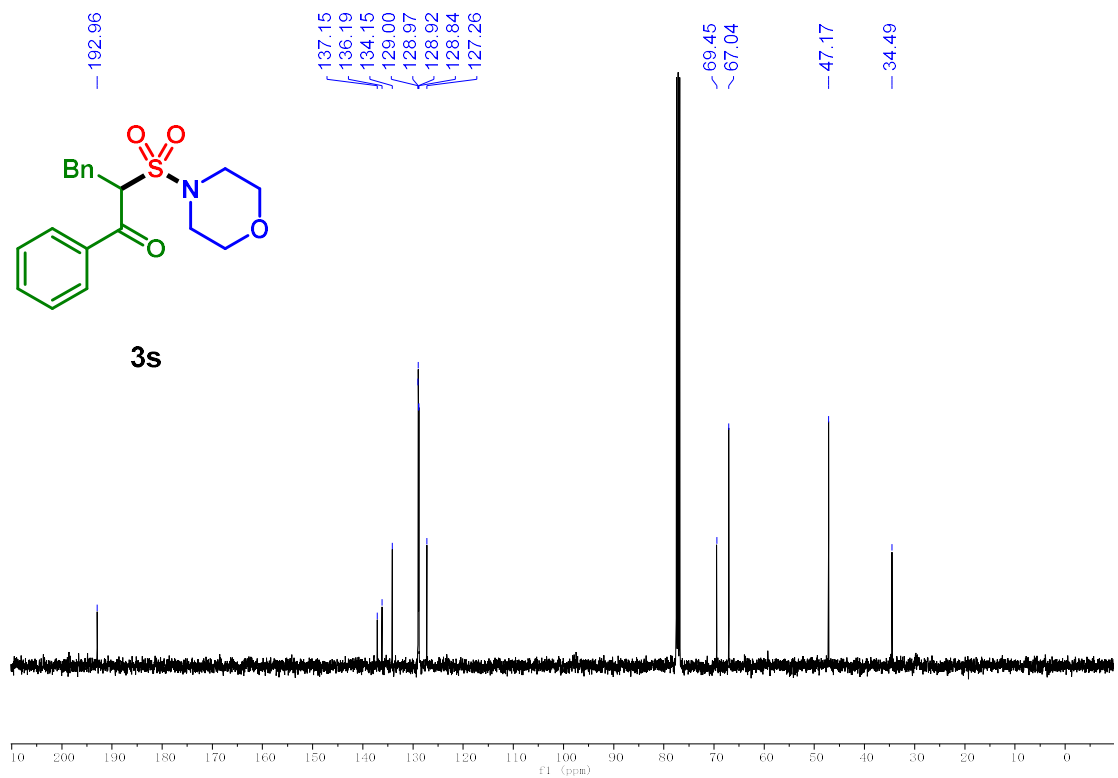

## 2-(morpholinosulfonyl)-3,4-dihydronaphthalen-1(2H)-one (3t)

$^1\text{H}$  NMR (400 MHz,  $\text{CDCl}_3$ )

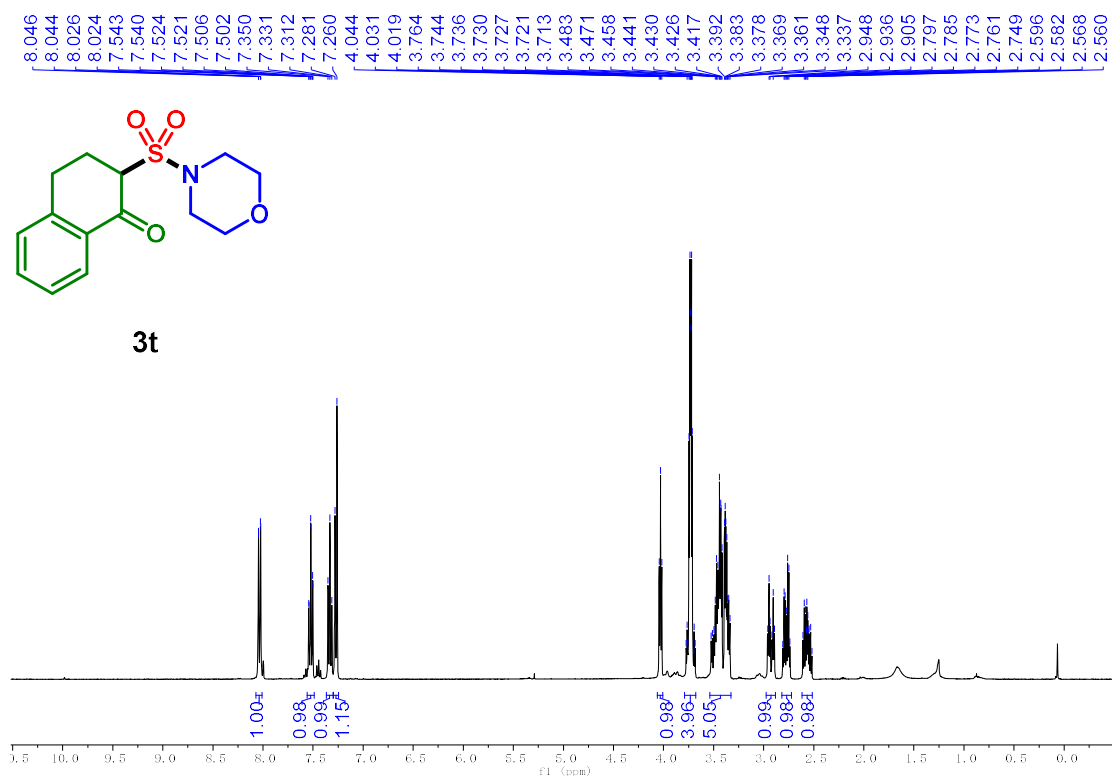

$^{13}\text{C}$  NMR (100 MHz,  $\text{CDCl}_3$ )

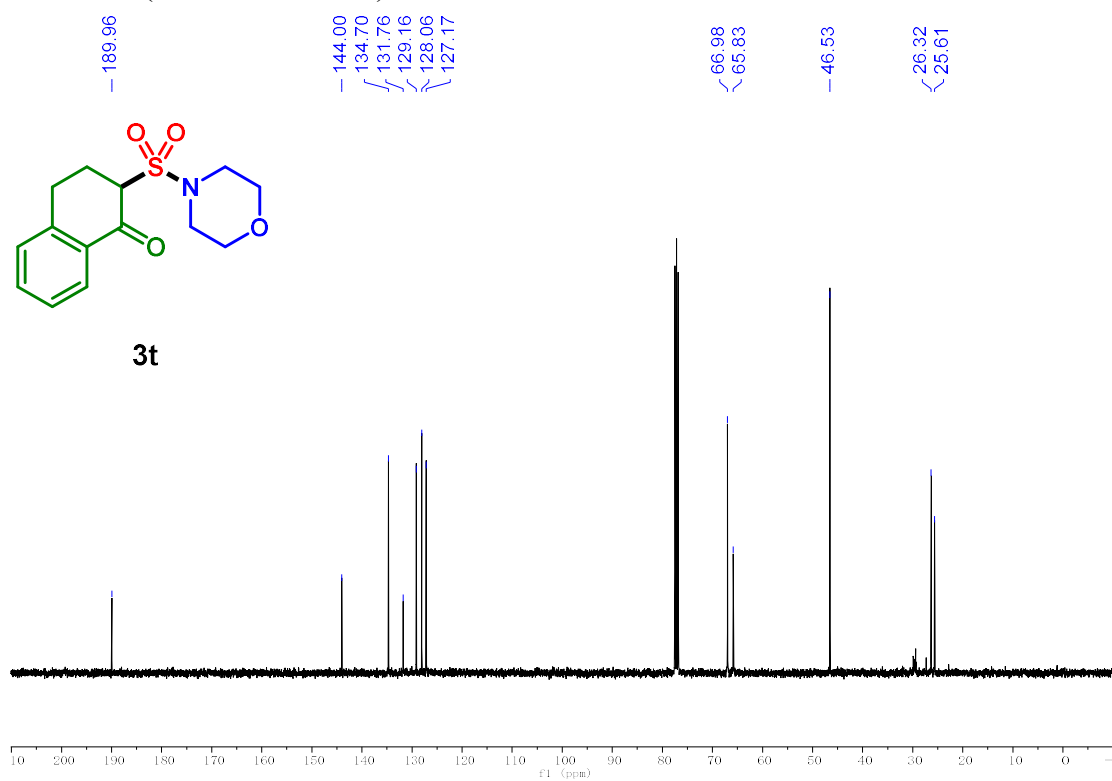

## 2-(thiomorpholinosulfonyl)-1-(p-tolyl)propan-1-one (3u)

$^1\text{H}$  NMR (400 MHz,  $\text{CDCl}_3$ )

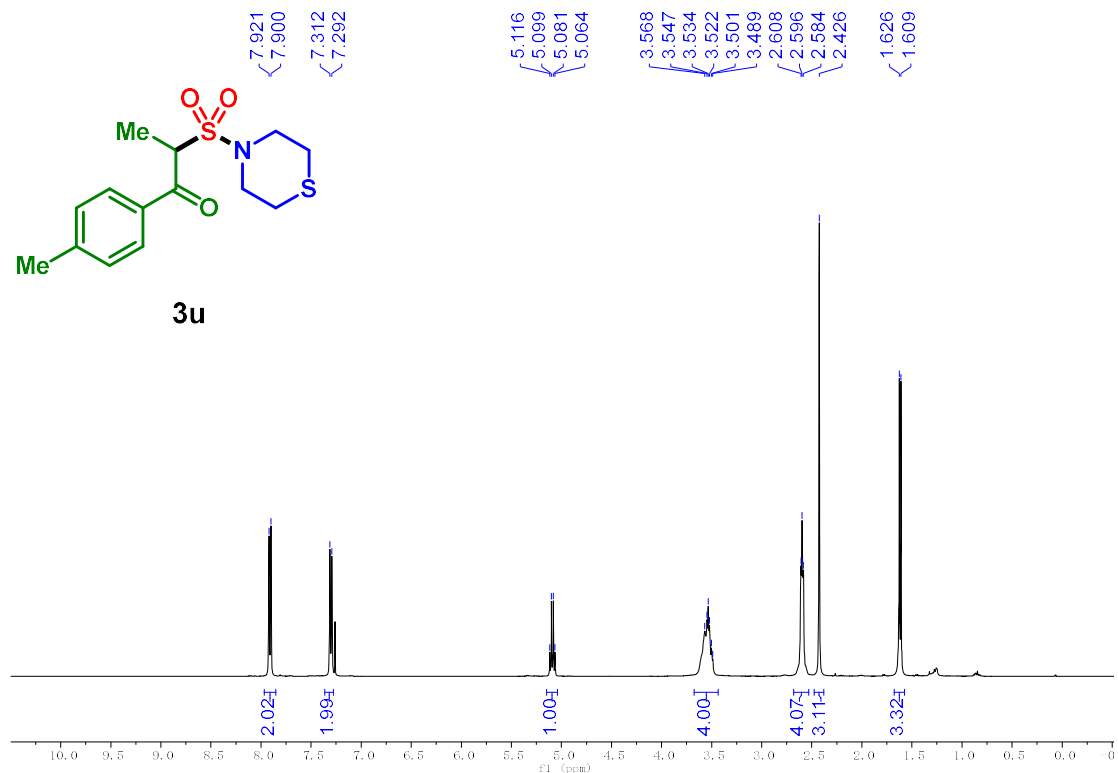

$^{13}\text{C}$  NMR (100 MHz,  $\text{CDCl}_3$ )

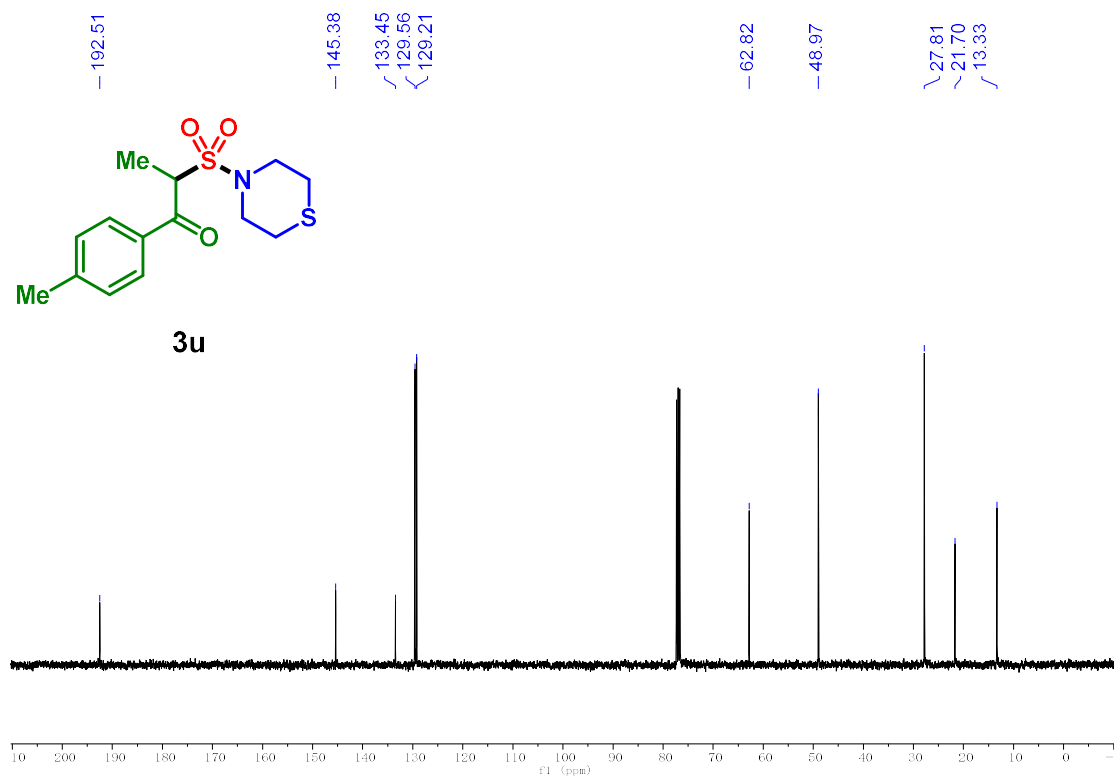

### tert-butyl 4-((1-oxo-1-(p-tolyl)propan-2-yl)sulfonyl)piperazine-1-carboxylate (3v)

$^1\text{H}$  NMR (400 MHz,  $\text{CDCl}_3$ )

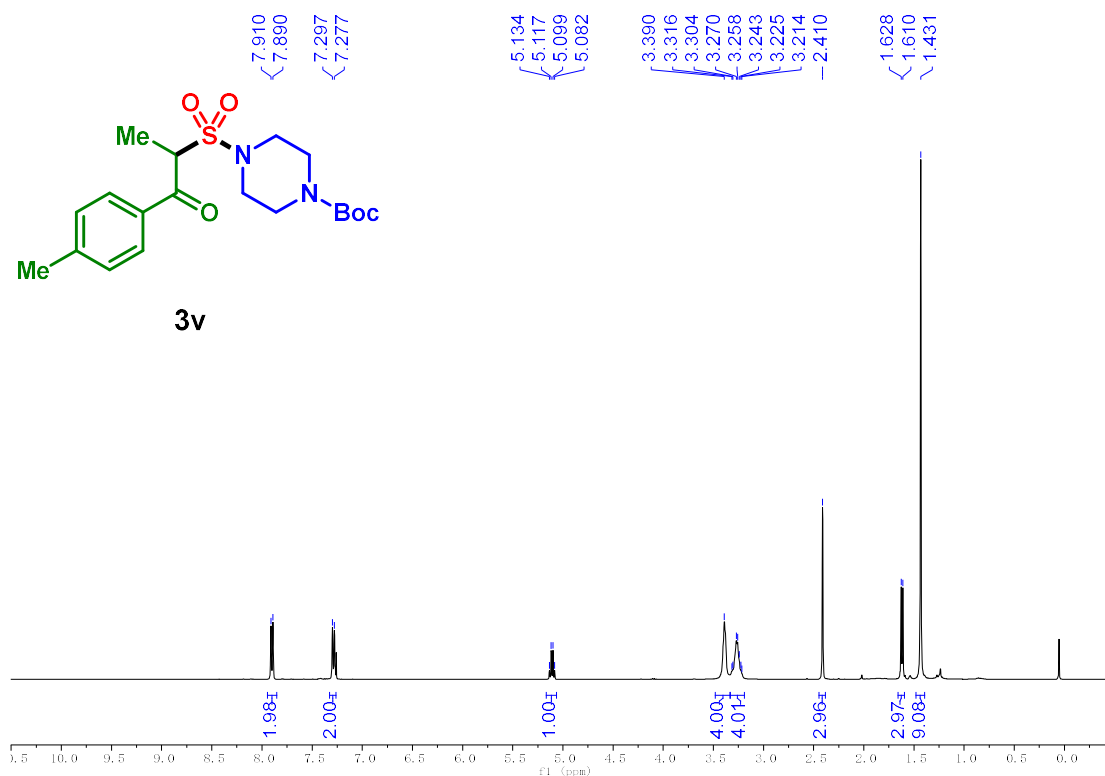

$^{13}\text{C}$  NMR (100 MHz,  $\text{CDCl}_3$ )

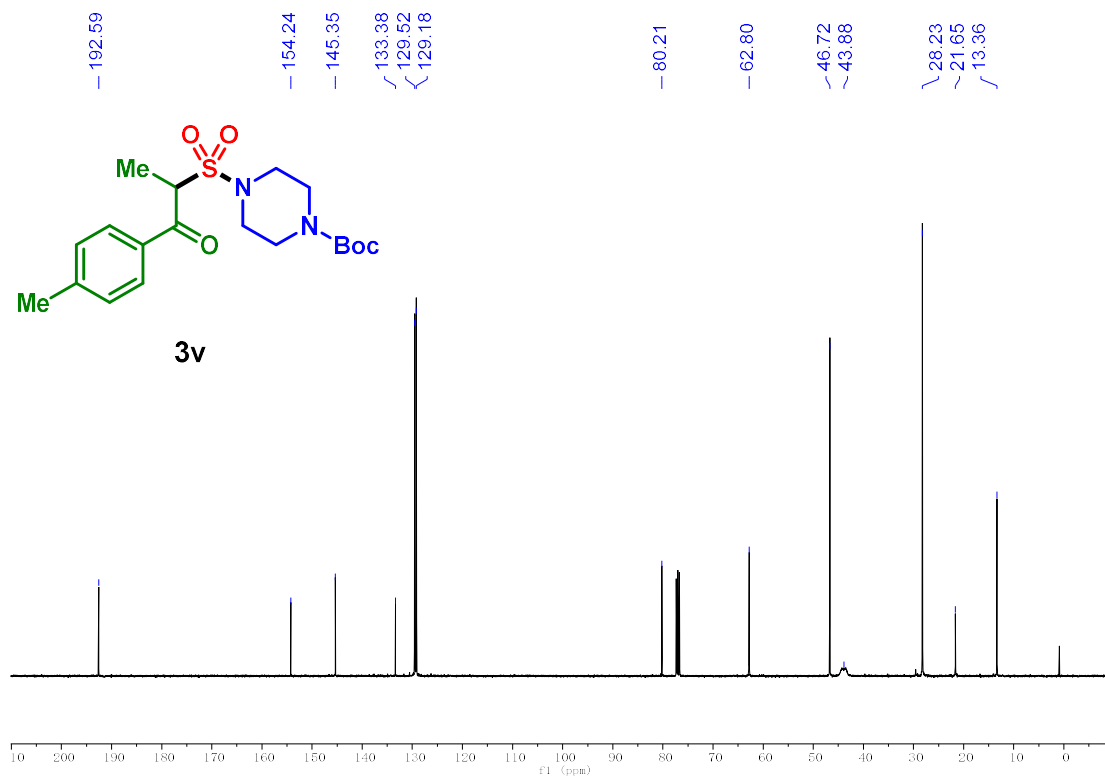

## 2-((4-benzoylpiperazin-1-yl)sulfonyl)-1-(p-tolyl)propan-1-one (3w)

$^1\text{H}$  NMR (400 MHz,  $\text{CDCl}_3$ )

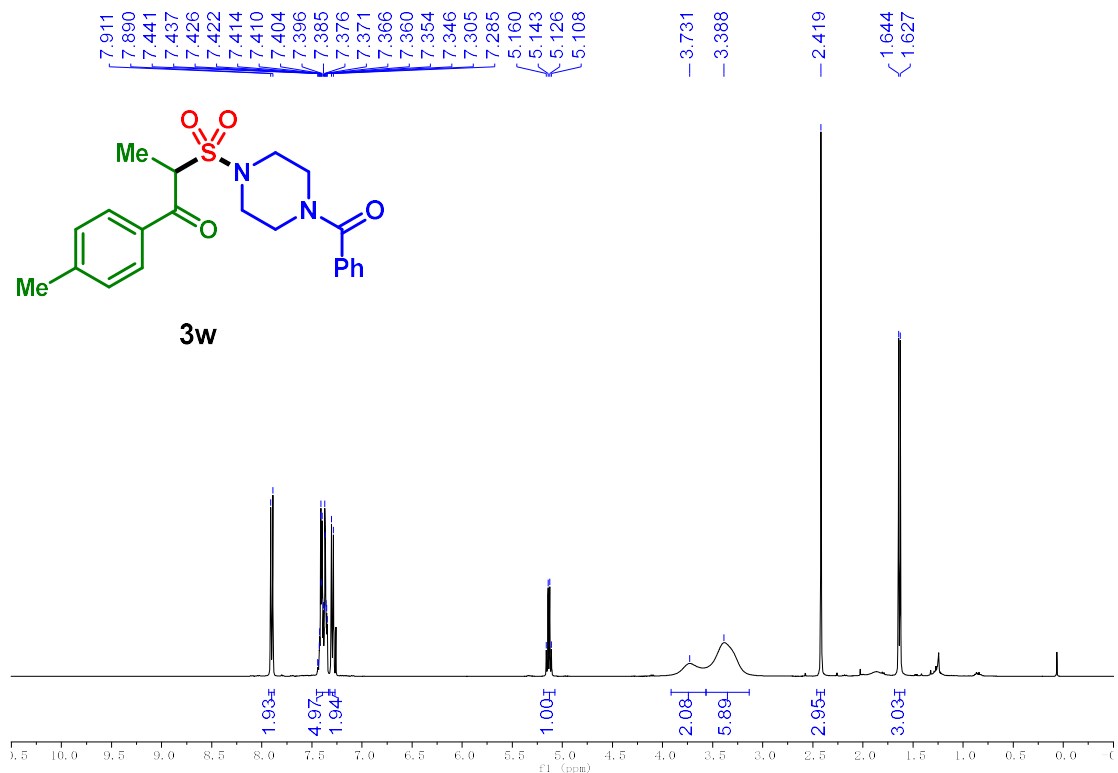

$^{13}\text{C}$  NMR (100 MHz,  $\text{CDCl}_3$ )

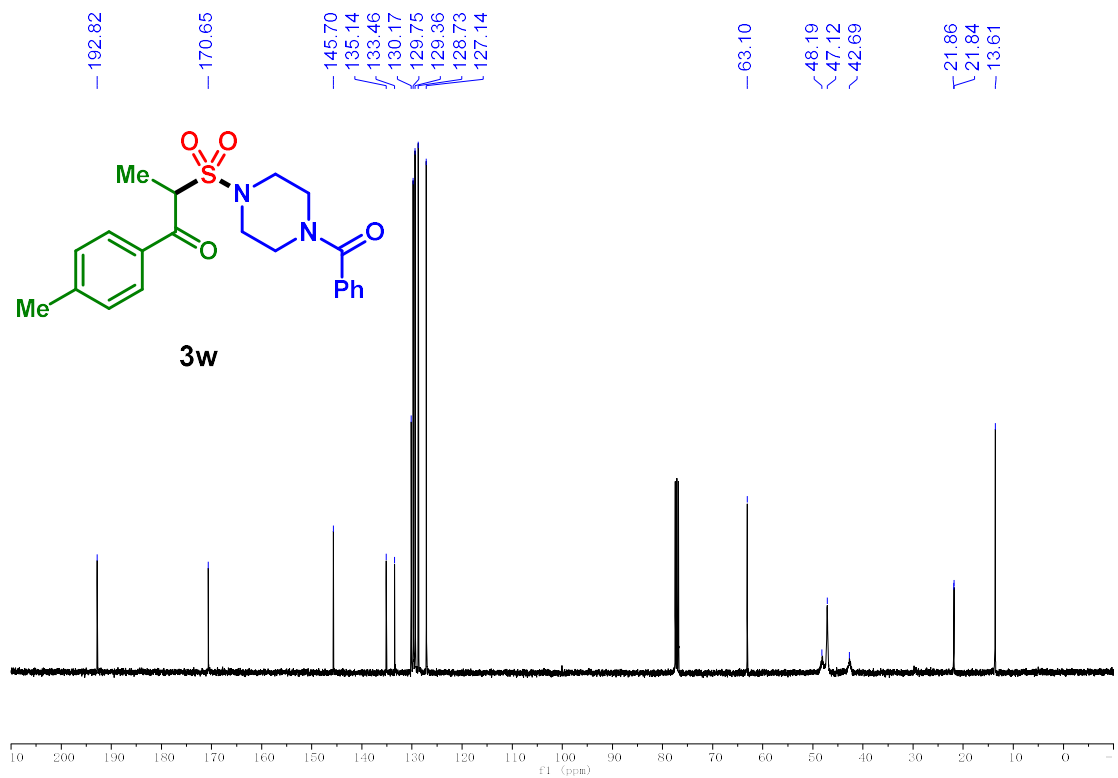

## 2-(pyrrolidin-1-ylsulfonyl)-1-(p-tolyl)propan-1-one (3x)

$^1\text{H}$  NMR (400 MHz,  $\text{CDCl}_3$ )

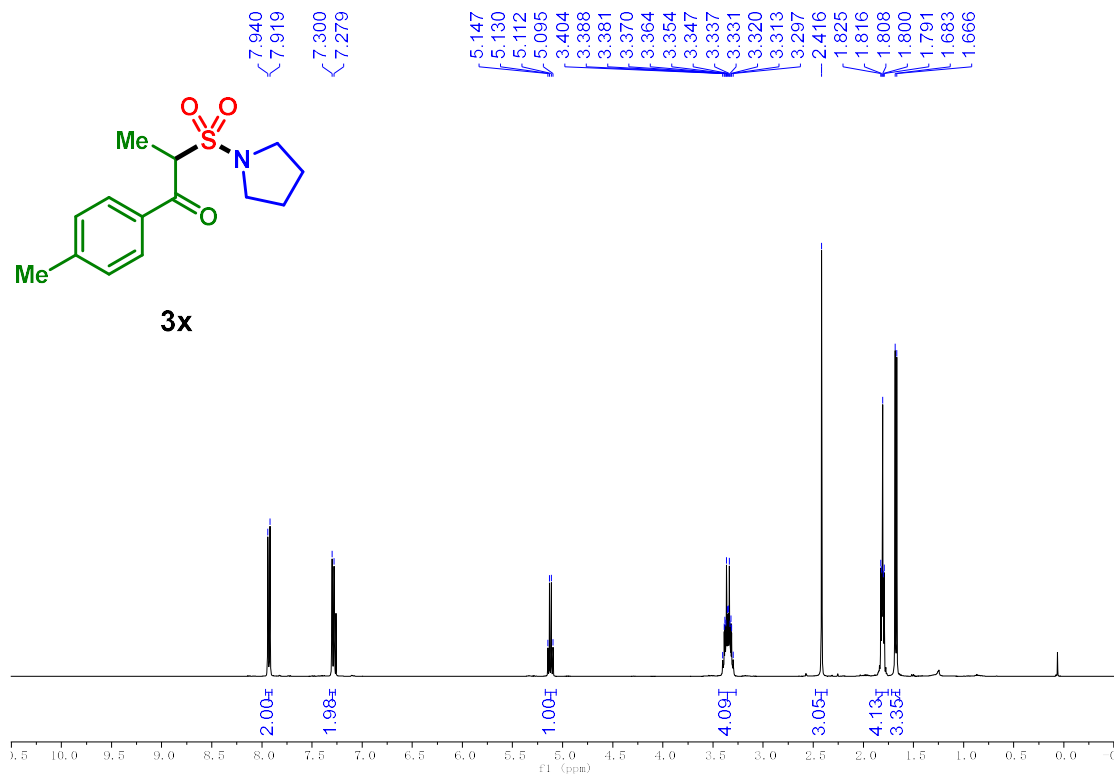

$^{13}\text{C}$  NMR (100 MHz,  $\text{CDCl}_3$ )

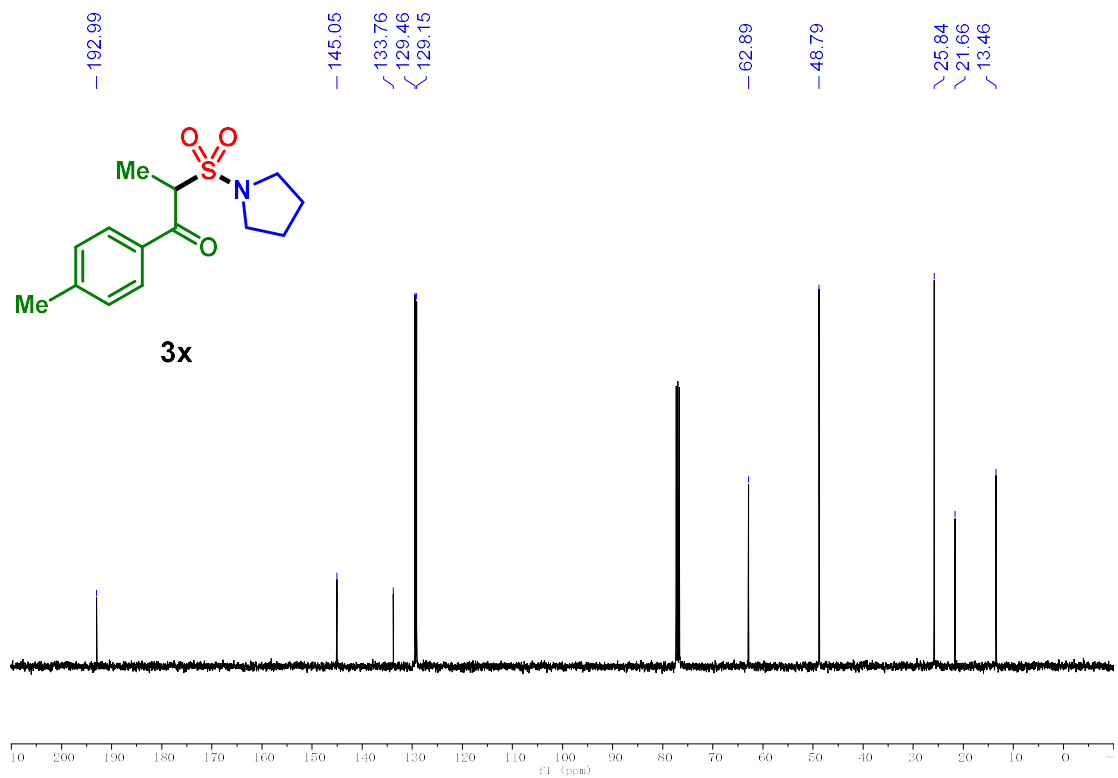

## 2-(piperidin-1-ylsulfonyl)-1-(p-tolyl)propan-1-one (3y)

$^1\text{H NMR}$  (400 MHz,  $\text{CDCl}_3$ )

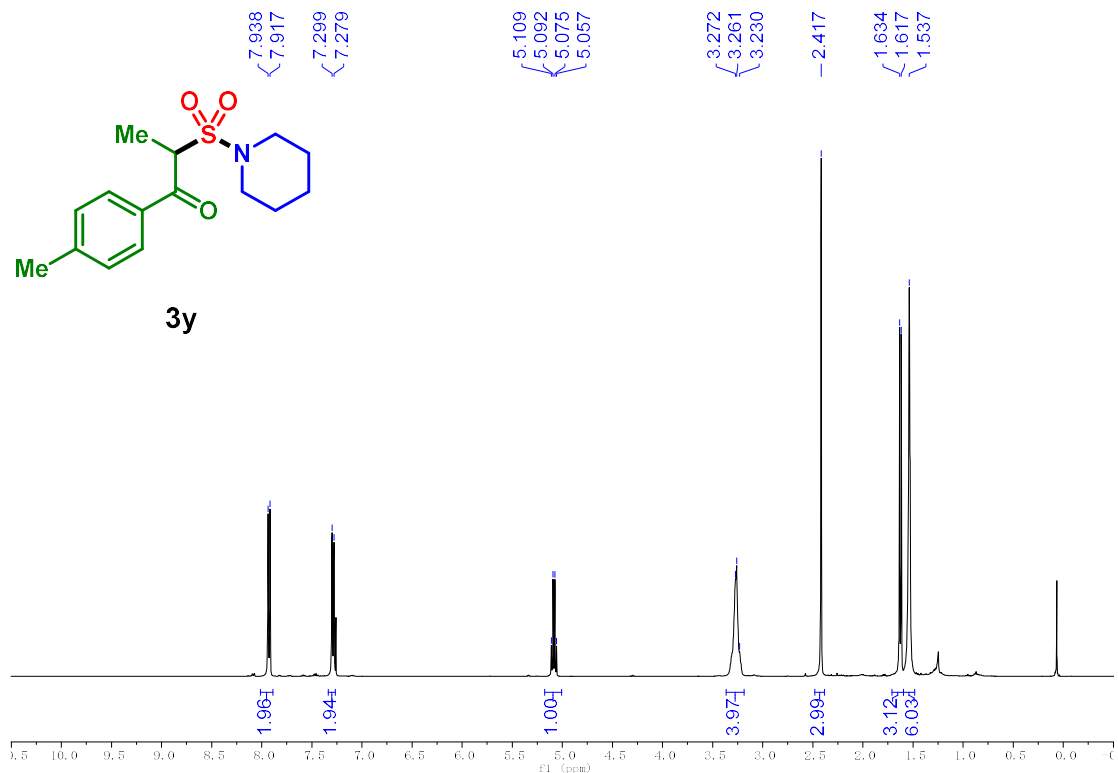

$^{13}\text{C NMR}$  (100 MHz,  $\text{CDCl}_3$ )

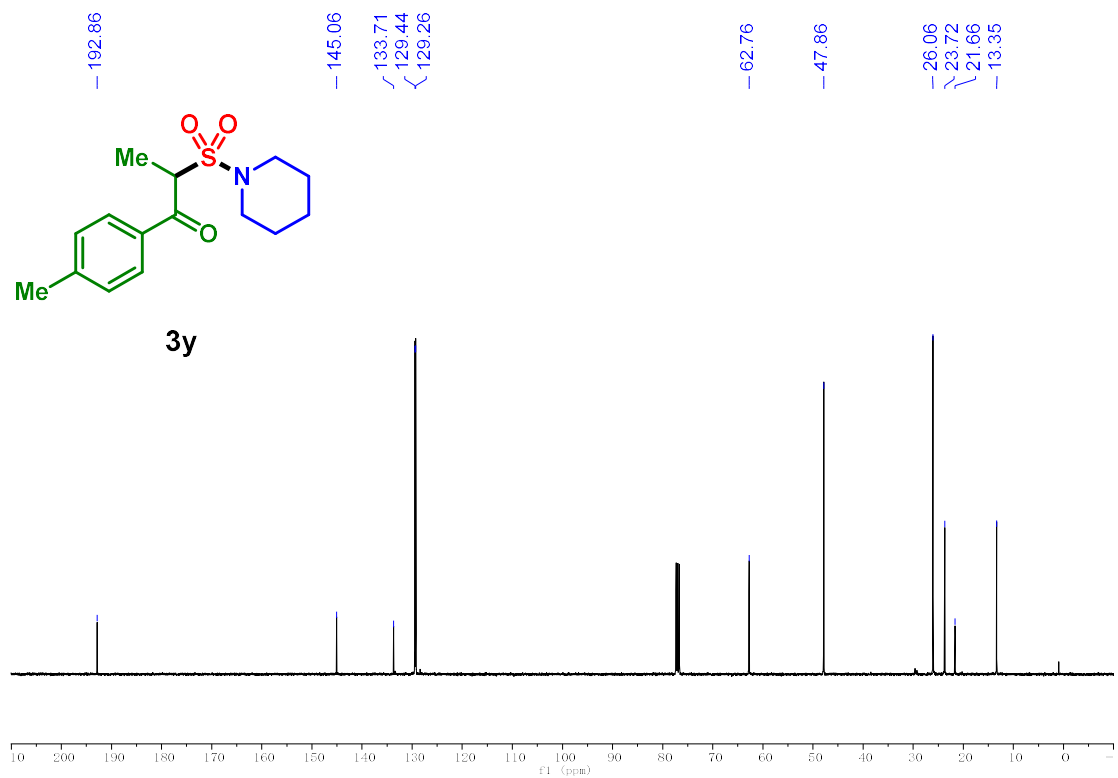



## 2-(azepan-1-ylsulfonyl)-1-(p-tolyl)propan-1-one (3z)

$^1\text{H}$  NMR (400 MHz,  $\text{CDCl}_3$ )

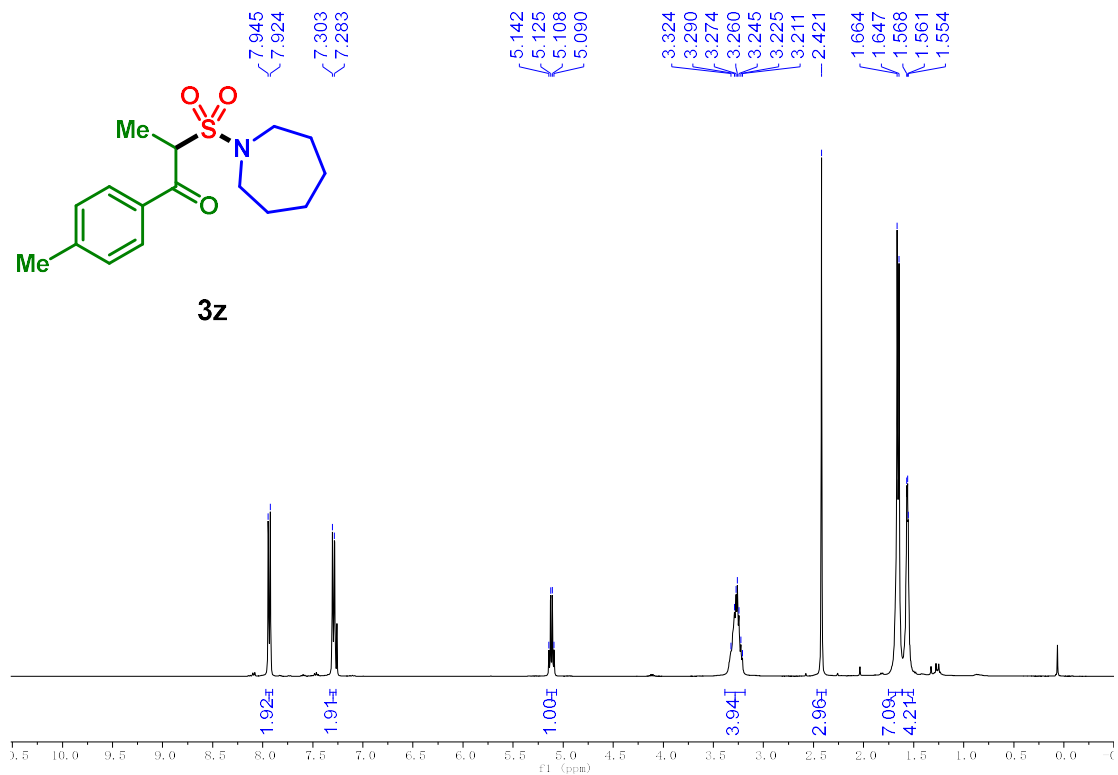

$^{13}\text{C}$  NMR (100 MHz,  $\text{CDCl}_3$ )

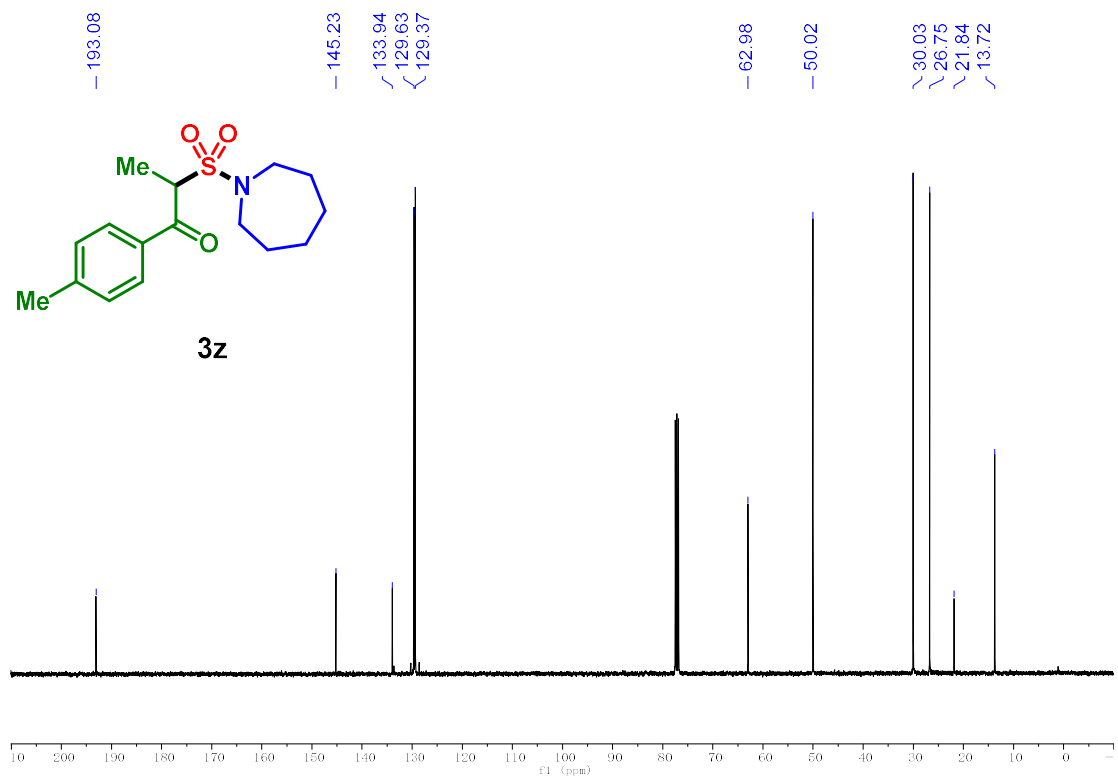

## 2-((4-methylpiperidin-1-yl)sulfonyl)-1-(p-tolyl)propan-1-one (3aa)

$^1\text{H}$  NMR (400 MHz,  $\text{CDCl}_3$ )

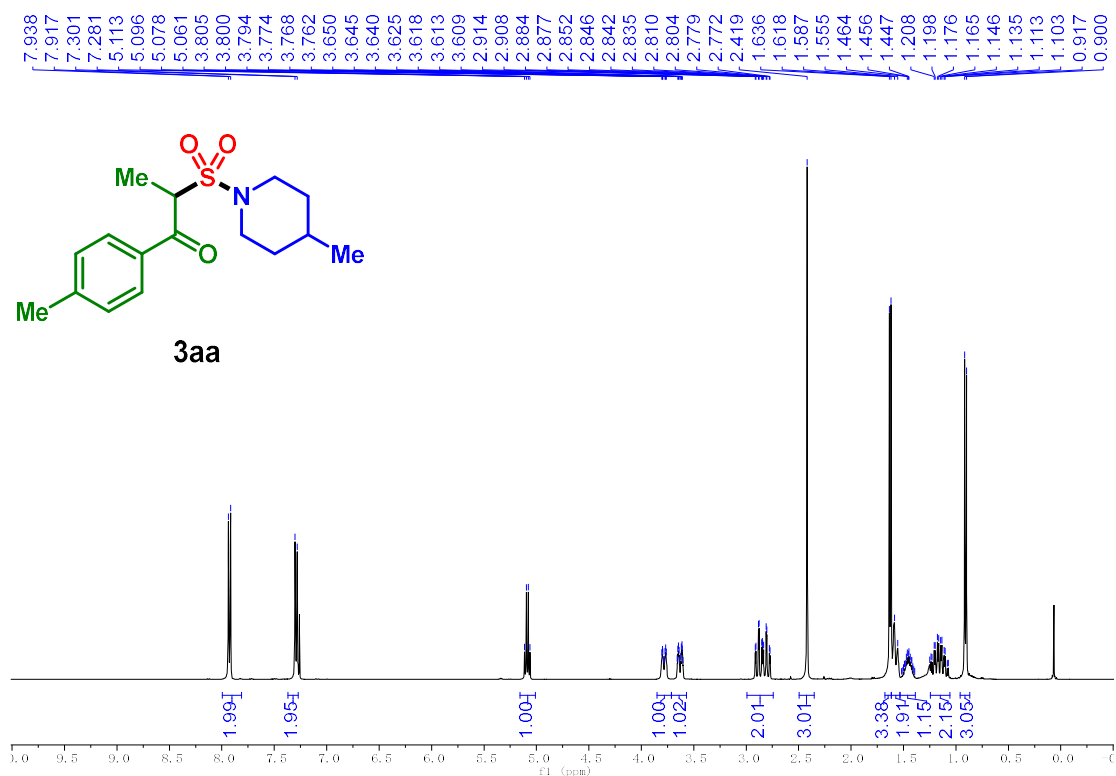

$^{13}\text{C}$  NMR (100 MHz,  $\text{CDCl}_3$ )

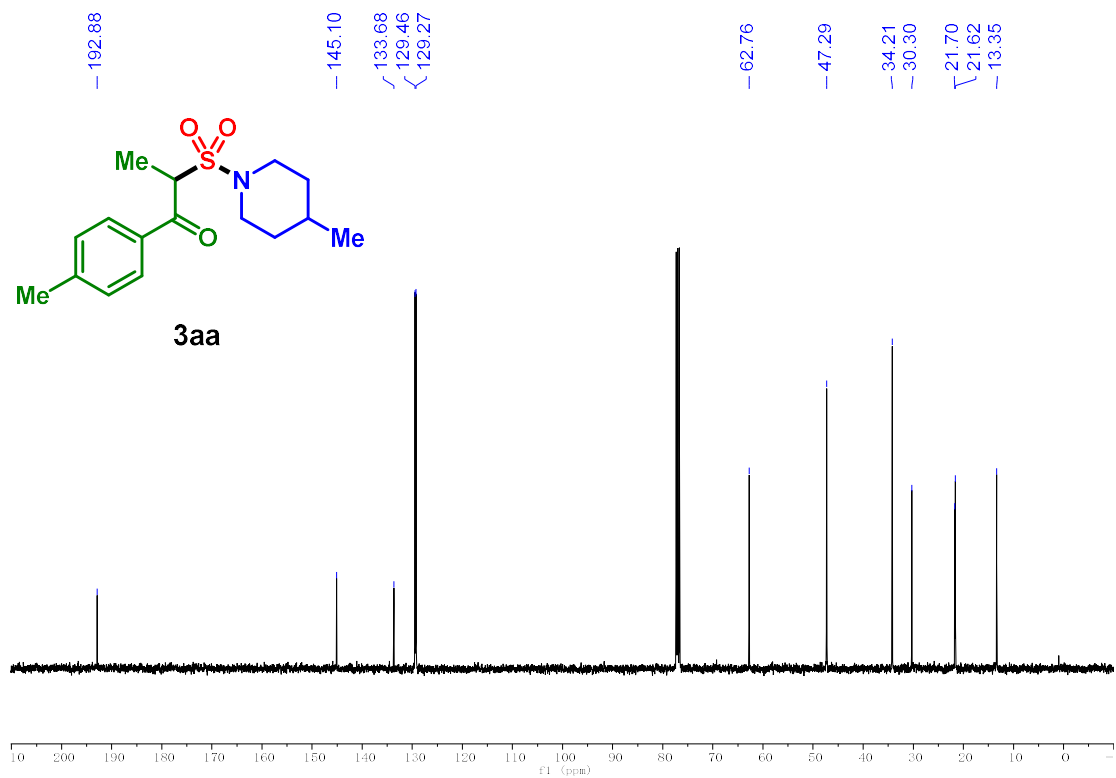

## 2-((3,5-dimethylpiperidin-1-yl)sulfonyl)-1-(p-tolyl)propan-1-one (3ab)

$^1\text{H}$  NMR (400 MHz,  $\text{CDCl}_3$ )

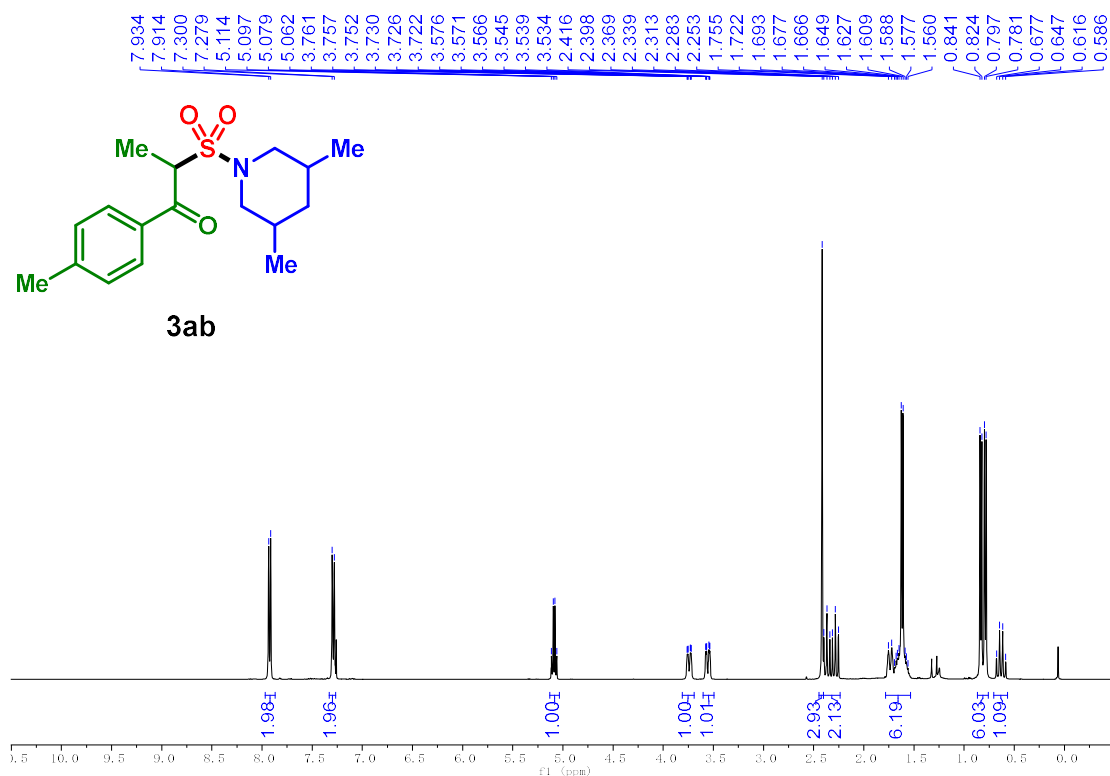

$^{13}\text{C}$  NMR (100 MHz,  $\text{CDCl}_3$ )

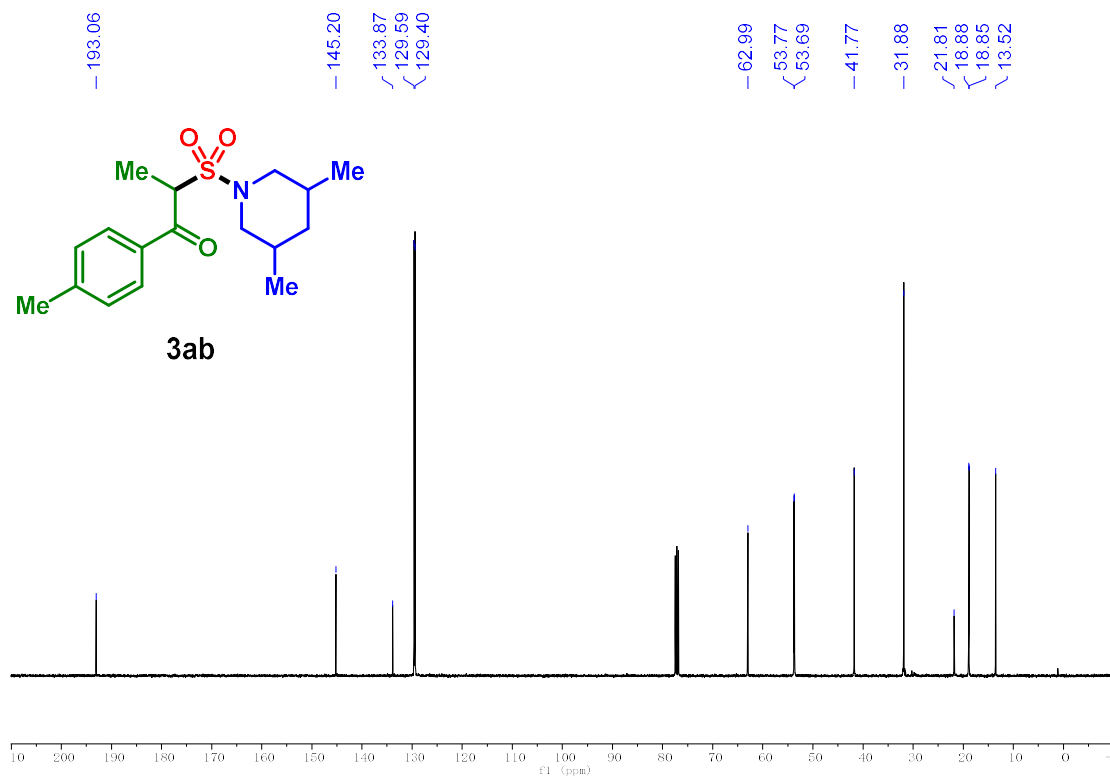

## 2-((4-benzylpiperidin-1-yl)sulfonyl)-1-(p-tolyl)propan-1-one (3ac)

$^1\text{H}$  NMR (400 MHz,  $\text{CDCl}_3$ )

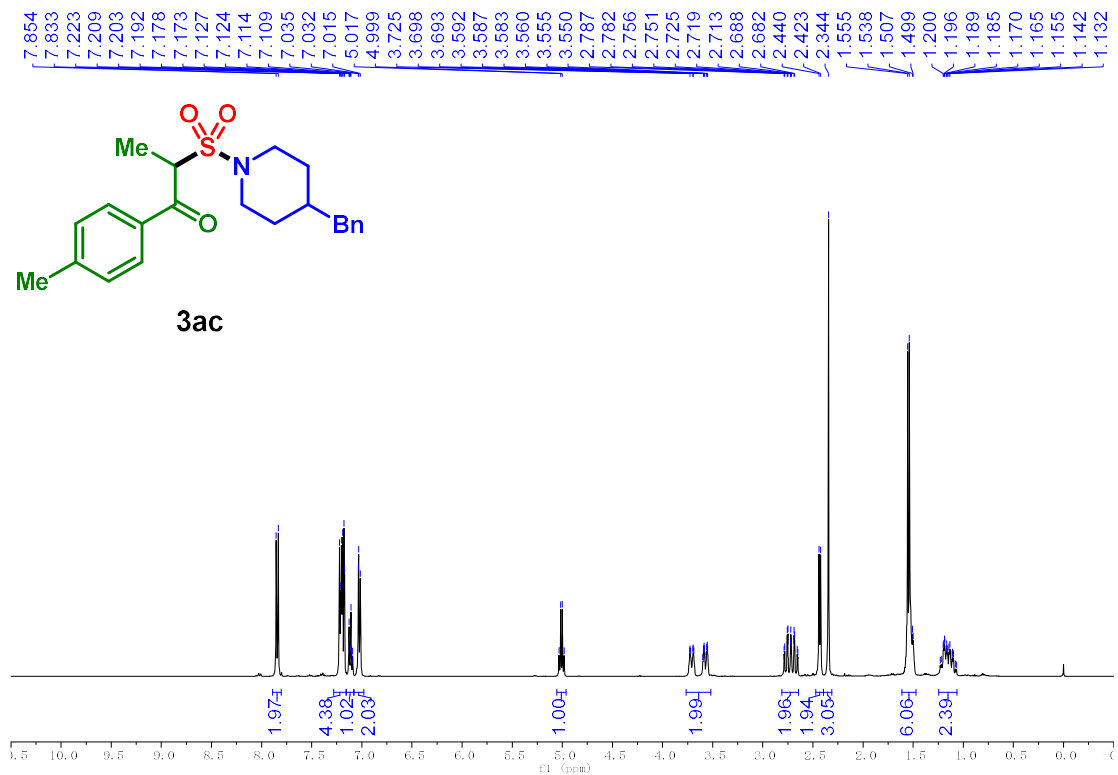

$^{13}\text{C}$  NMR (100 MHz,  $\text{CDCl}_3$ )

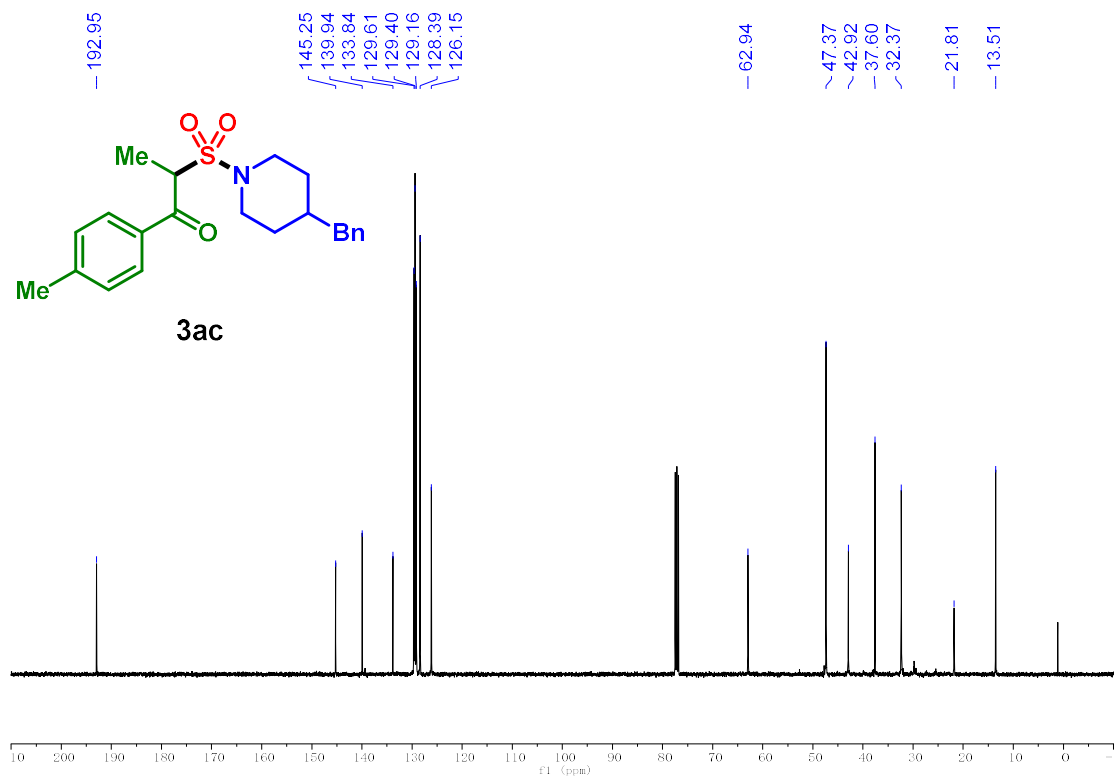

## 2-((4-phenylpiperidin-1-yl)sulfonyl)-1-(p-tolyl)propan-1-one (3ad)

$^1\text{H}$  NMR (400 MHz,  $\text{CDCl}_3$ )

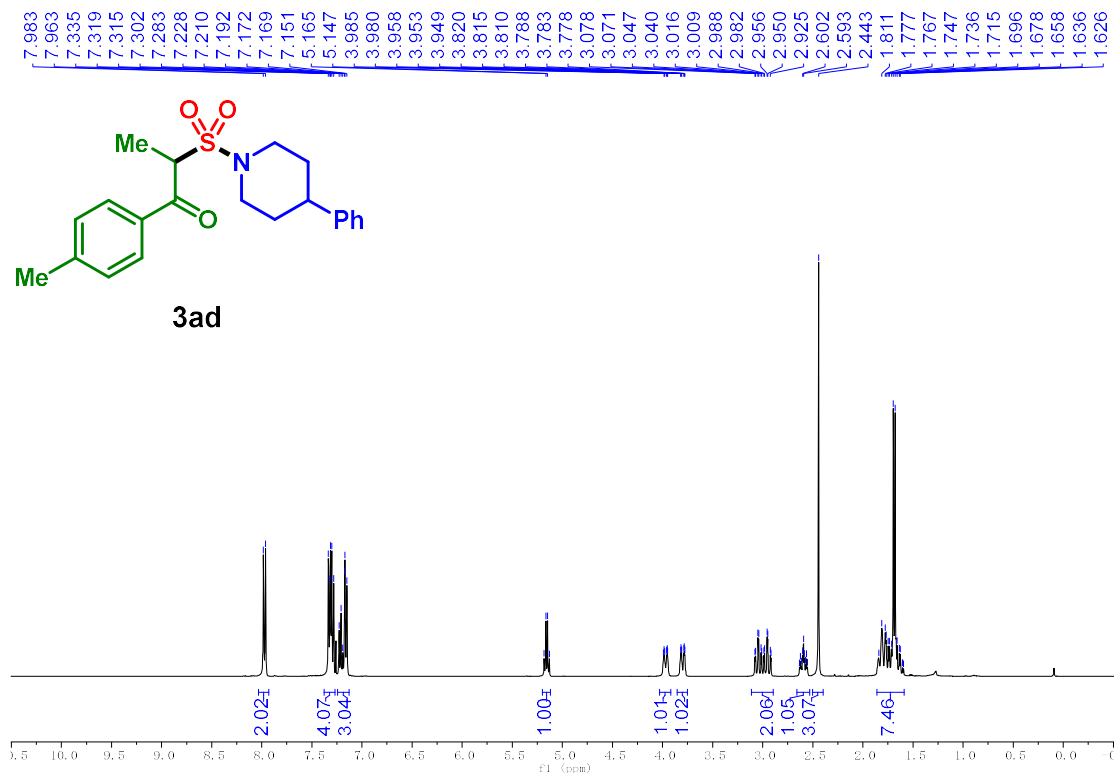

$^{13}\text{C}$  NMR (100 MHz,  $\text{CDCl}_3$ )

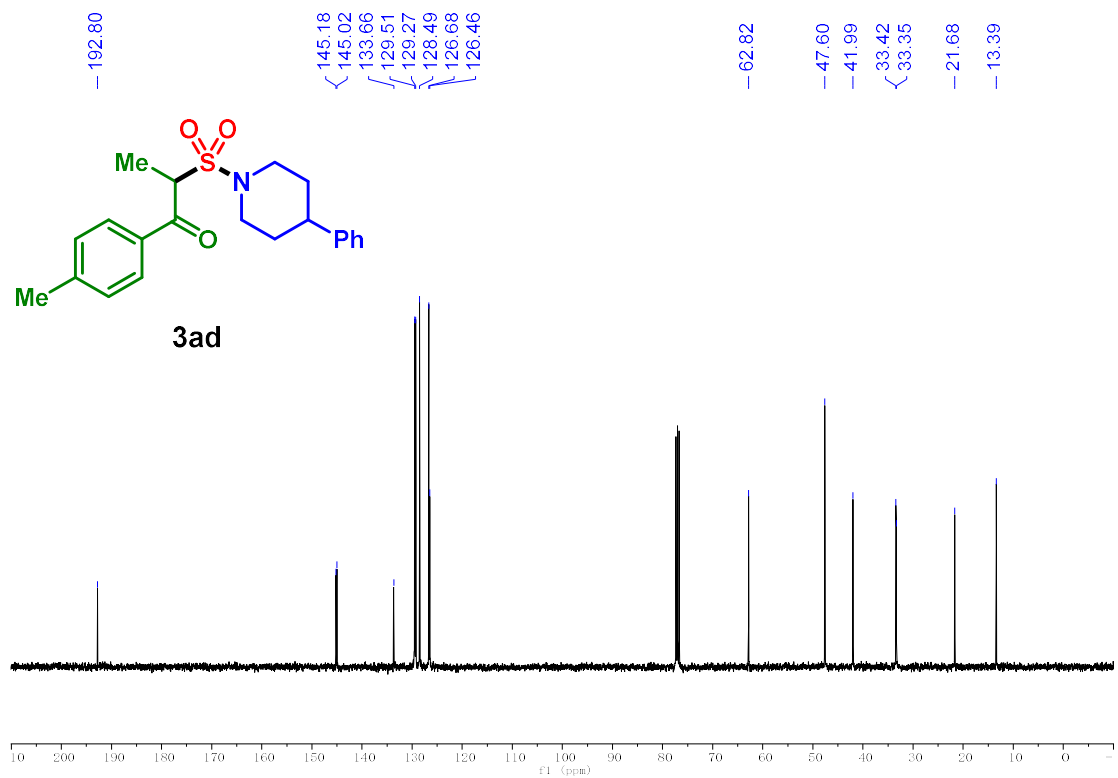

# ethyl 1-((1-oxo-1-(p-tolyl)propan-2-yl)sulfonyl)piperidine-4-carboxylate (3ae)

<sup>1</sup>H NMR (400 MHz, CDCl<sub>3</sub>)

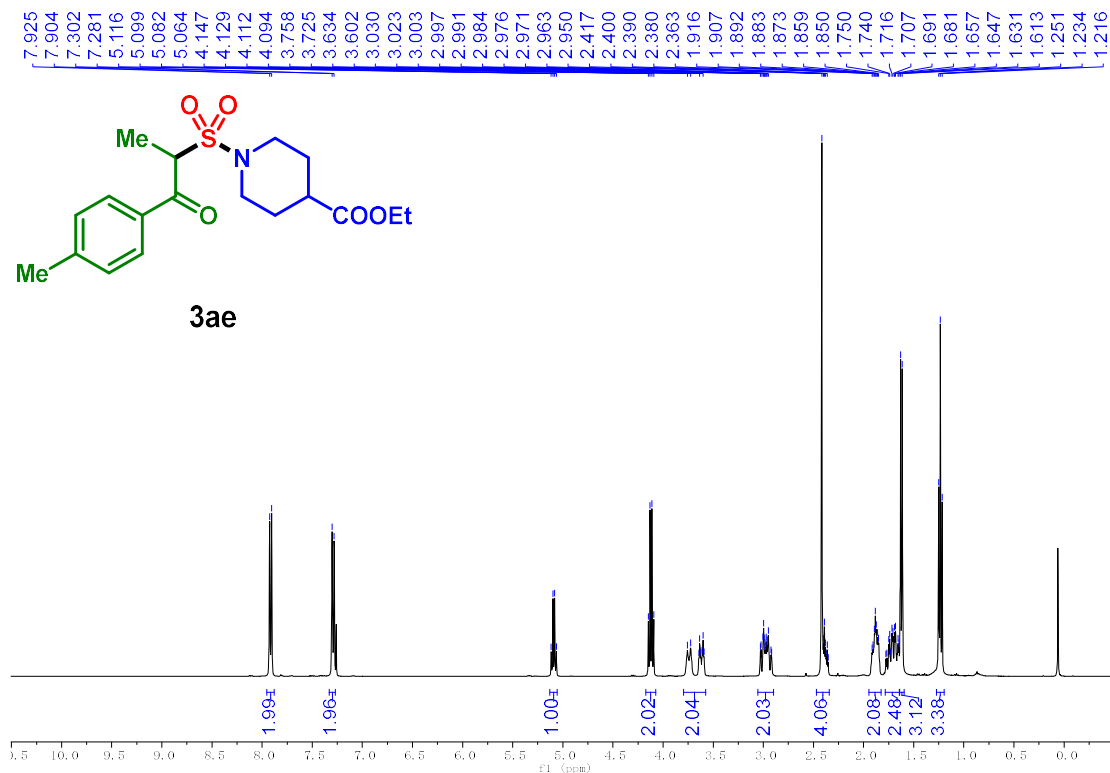

<sup>13</sup>C NMR (100 MHz, CDCl<sub>3</sub>)

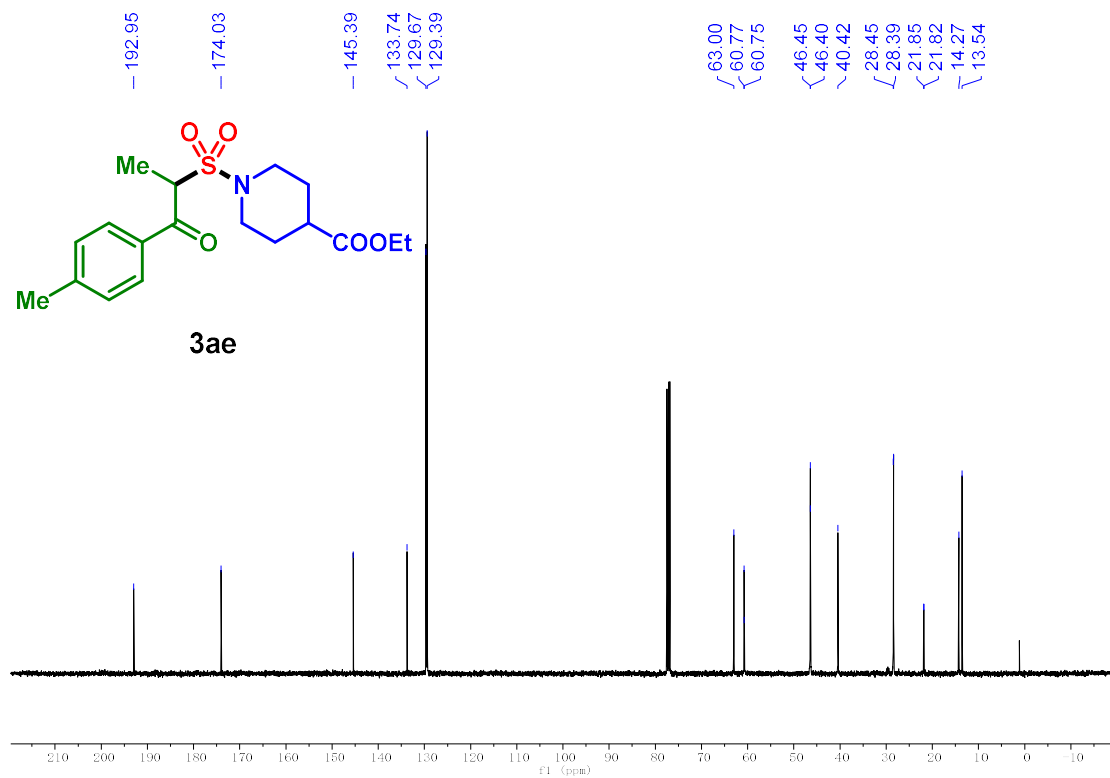

## 2-((1,4-dioxo-8-azaspiro[4.5]decan-8-yl)sulfonyl)-1-(p-tolyl)propan-1-one (3af)

$^1\text{H}$  NMR (400 MHz,  $\text{CDCl}_3$ )

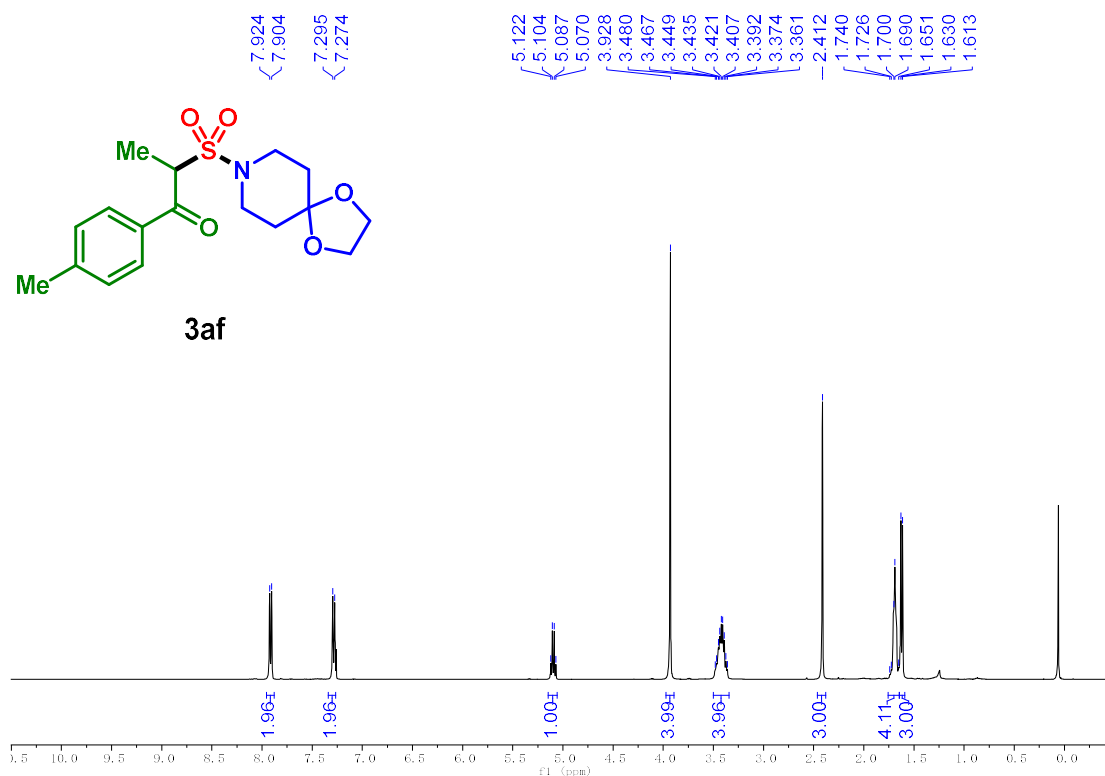

$^{13}\text{C}$  NMR (100 MHz,  $\text{CDCl}_3$ )

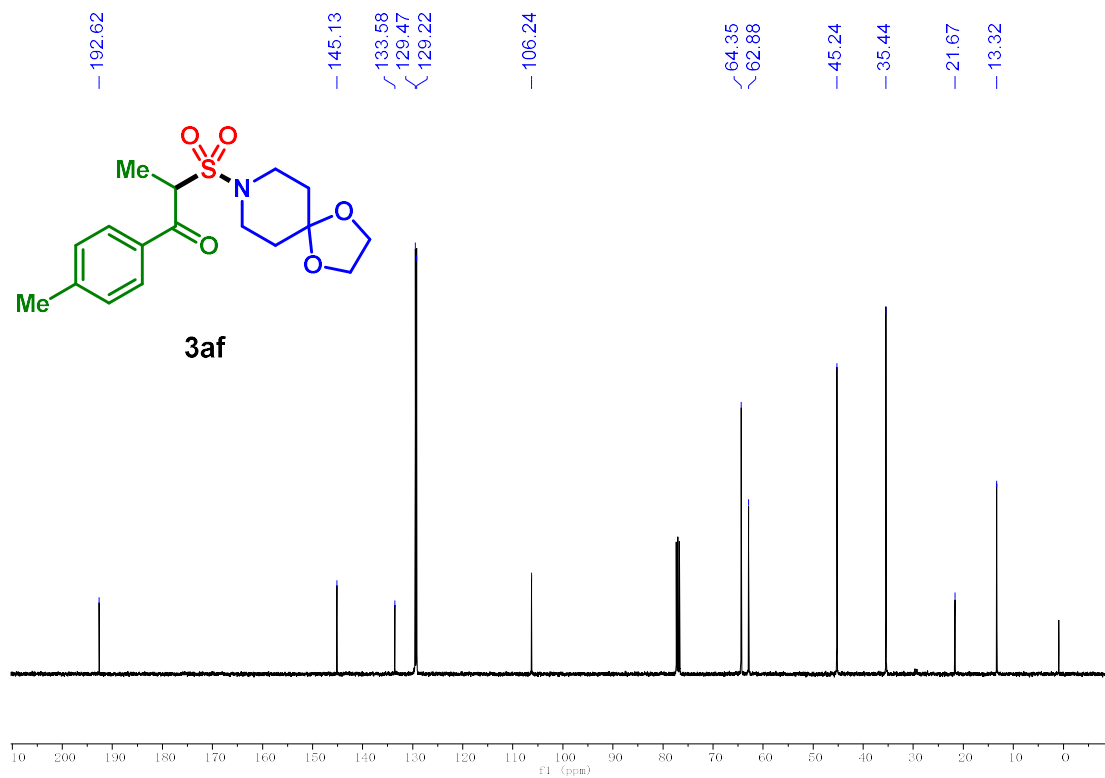

# N-isobutyl-1-oxo-1-(p-tolyl)propane-2-sulfonamide (3ag)

$^1\text{H}$  NMR (400 MHz,  $\text{CDCl}_3$ )

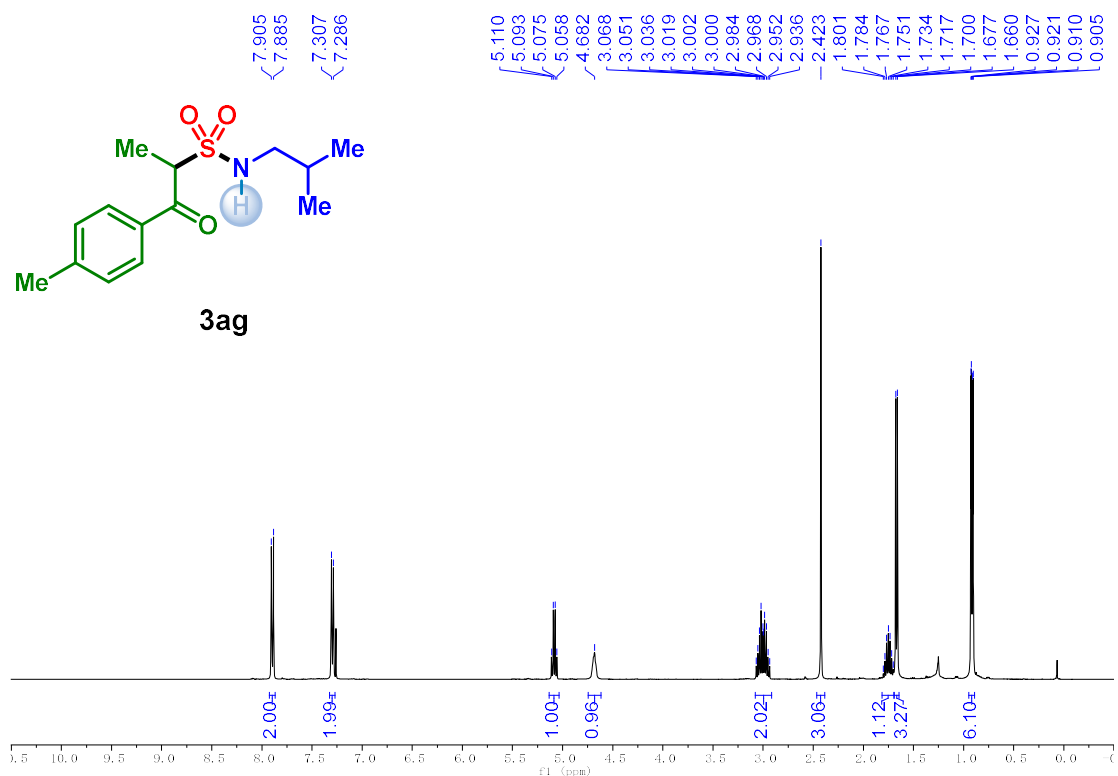

$^{13}\text{C}$  NMR (100 MHz,  $\text{CDCl}_3$ )

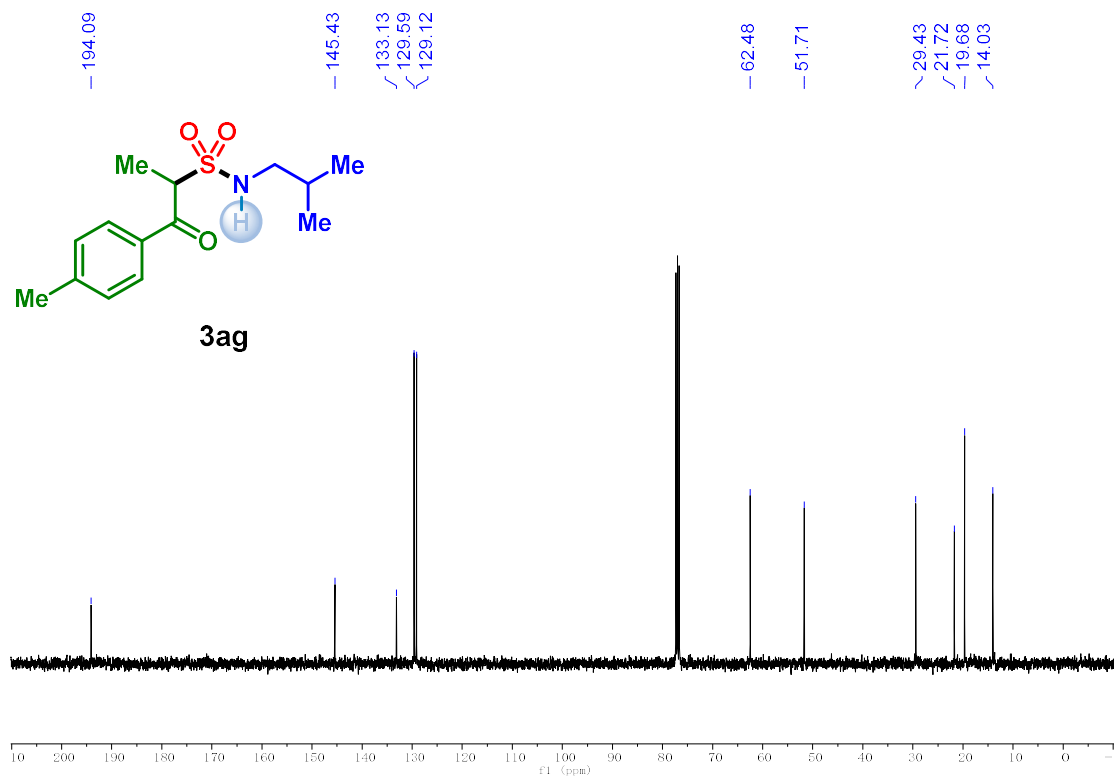



# N-cyclohexyl-1-oxo-1-(p-tolyl)propane-2-sulfonamide (3ah)

$^1\text{H}$  NMR (400 MHz,  $\text{CDCl}_3$ )

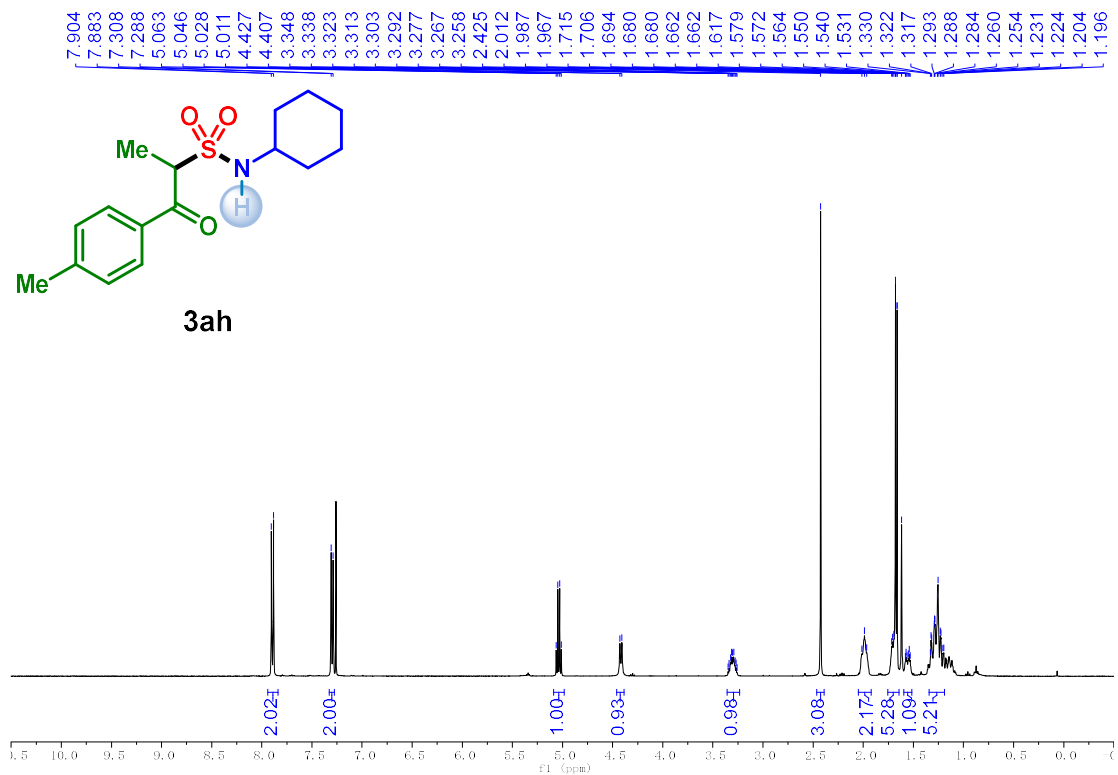

$^{13}\text{C}$  NMR (100 MHz,  $\text{CDCl}_3$ )

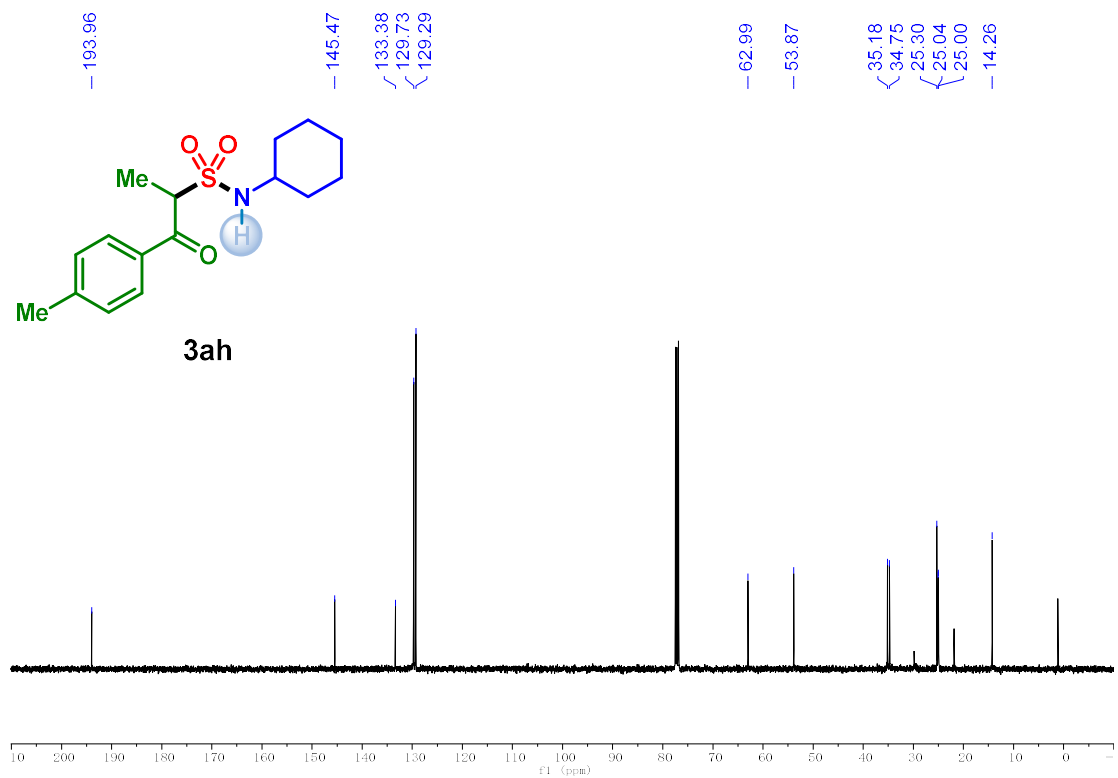

# N-methyl-1-oxo-N-pentyl-1-(p-tolyl)propane-2-sulfonamide (3ai)

$^1\text{H}$  NMR (400 MHz,  $\text{CDCl}_3$ )

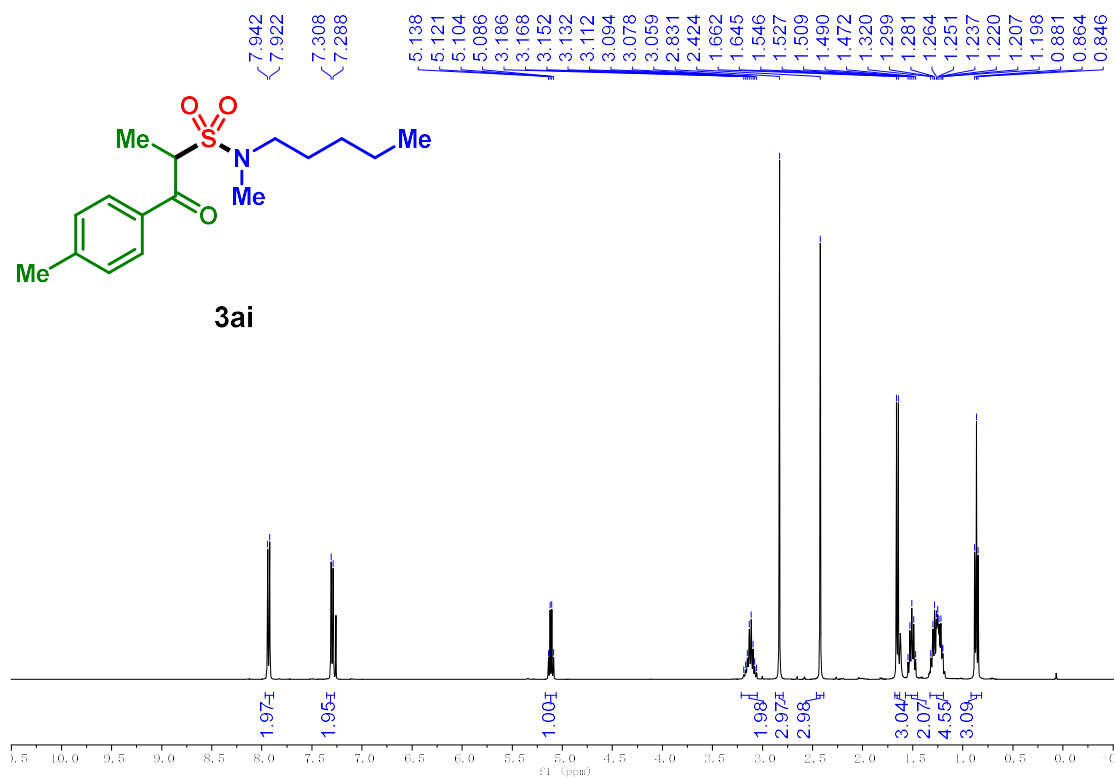

$^{13}\text{C}$  NMR (100 MHz,  $\text{CDCl}_3$ )

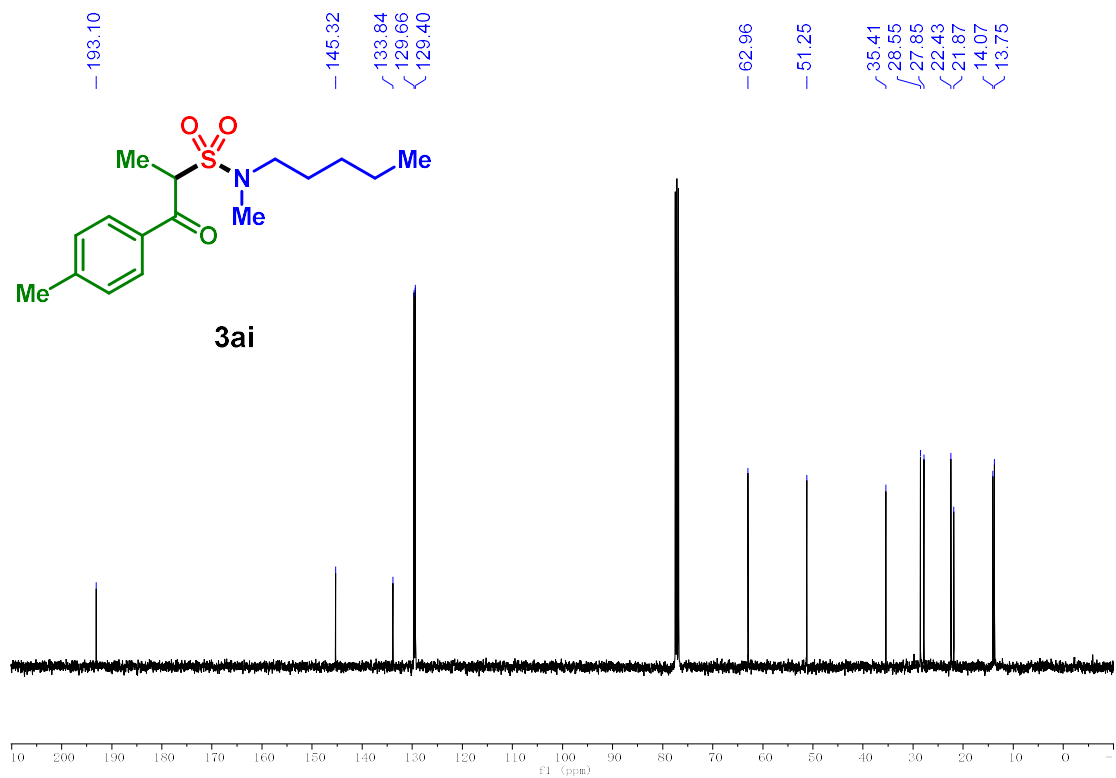

### N-benzyl-N-methyl-1-oxo-1-(p-tolyl)propane-2-sulfonamide (3aj)

<sup>1</sup>H NMR (400 MHz, CDCl<sub>3</sub>)

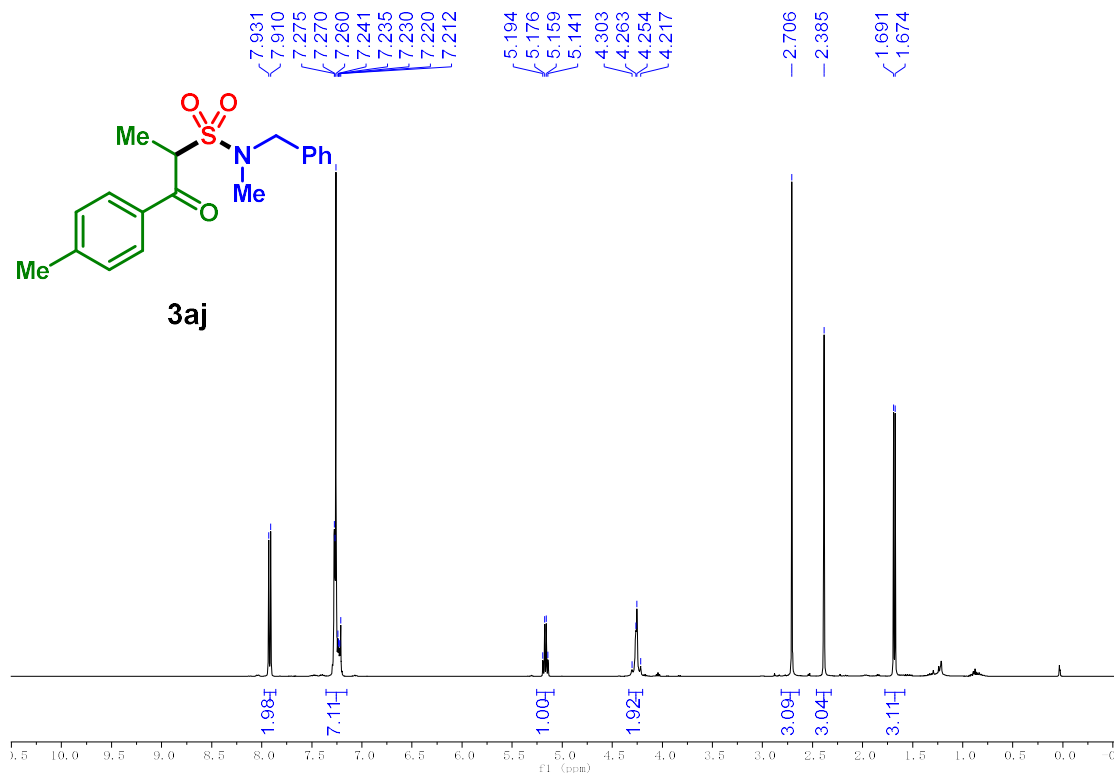

<sup>13</sup>C NMR (100 MHz, CDCl<sub>3</sub>)

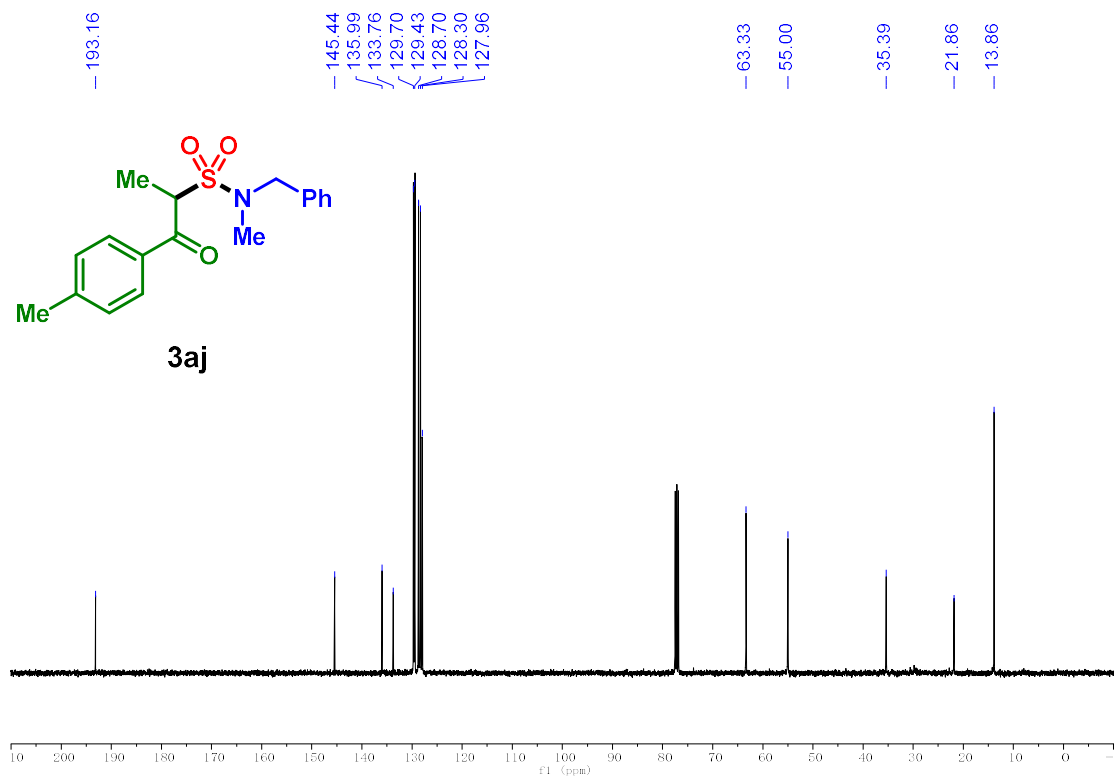

# N,N-dibenzyl-1-oxo-1-(p-tolyl)propane-2-sulfonamide (3ak)

<sup>1</sup>H NMR (400 MHz, CDCl<sub>3</sub>)

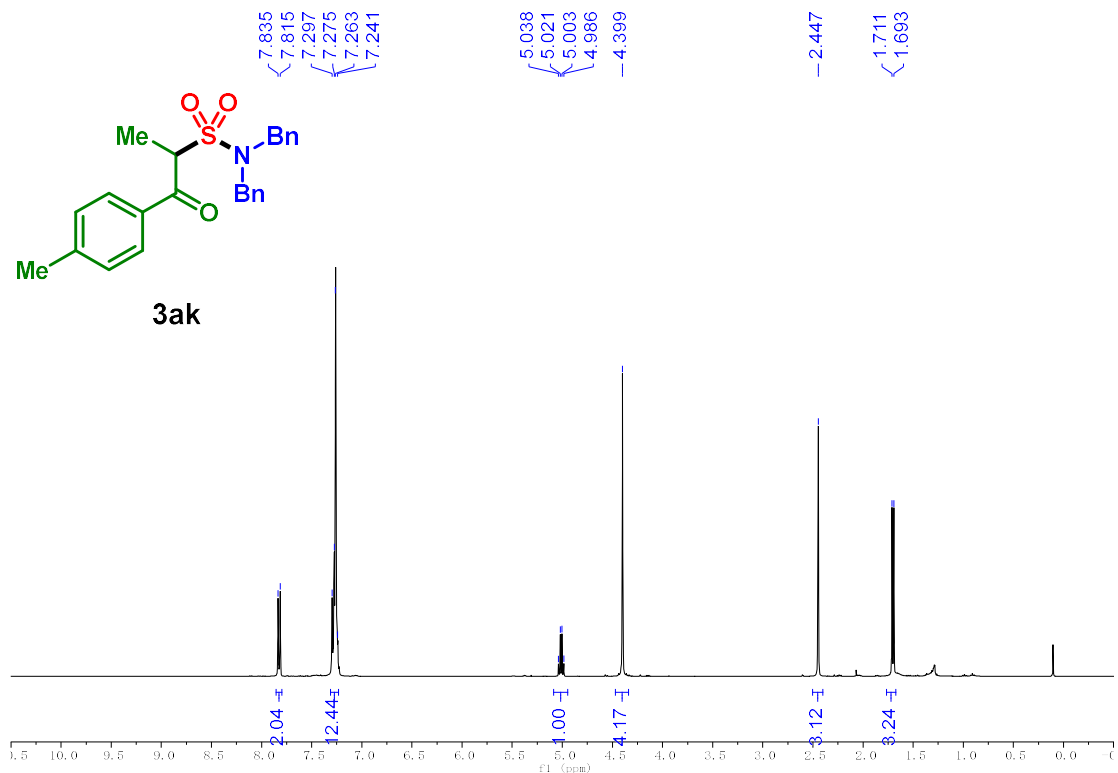

<sup>13</sup>C NMR (100 MHz, CDCl<sub>3</sub>)

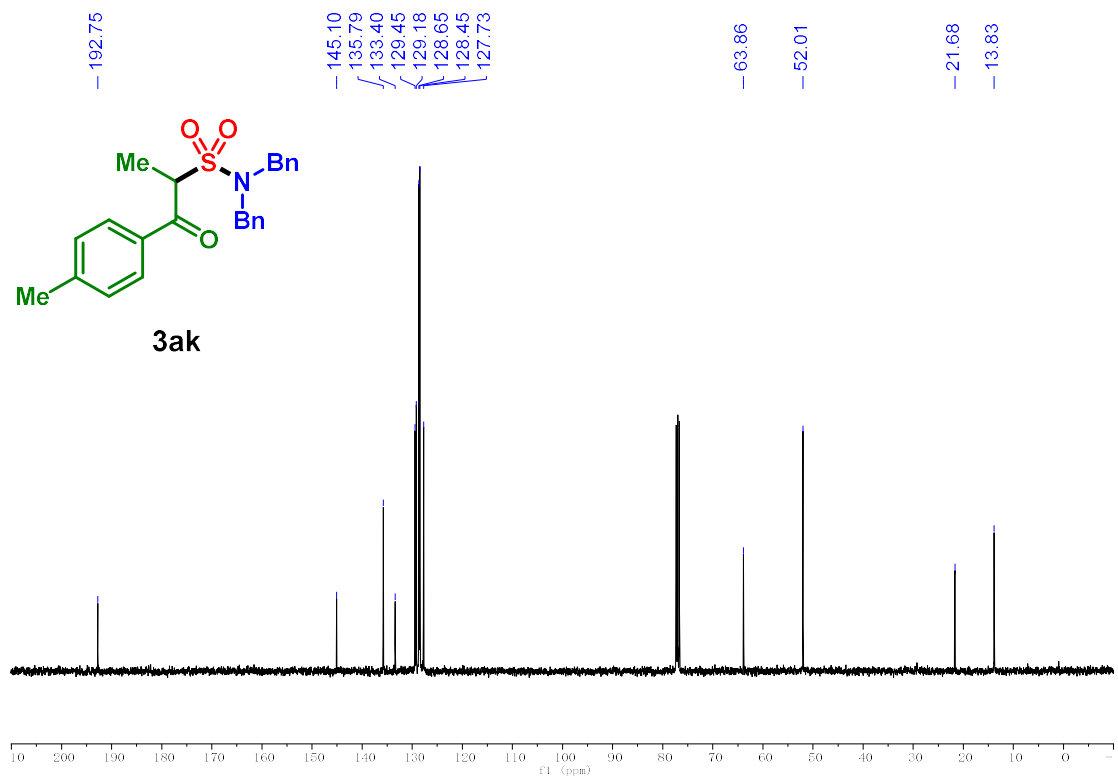

# N-methyl-1-oxo-N-phenethyl-1-(p-tolyl)propane-2-sulfonamide (3aI)

<sup>1</sup>H NMR (400 MHz, CDCl<sub>3</sub>)

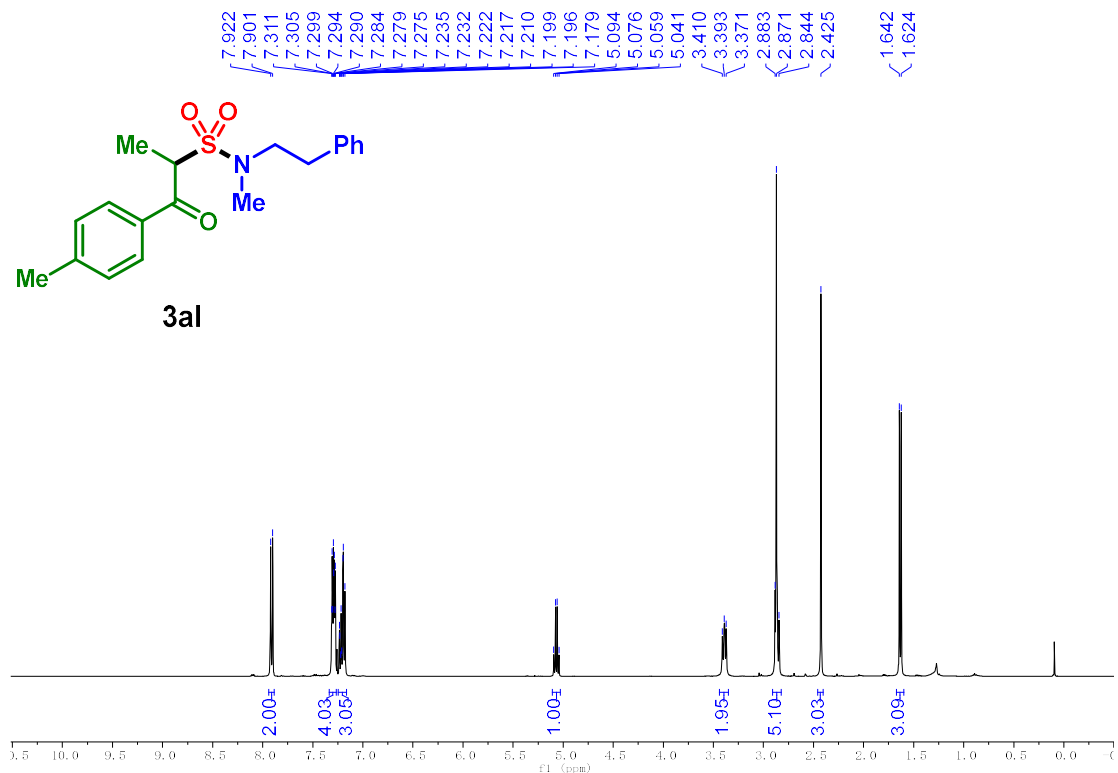

<sup>13</sup>C NMR (100 MHz, CDCl<sub>3</sub>)

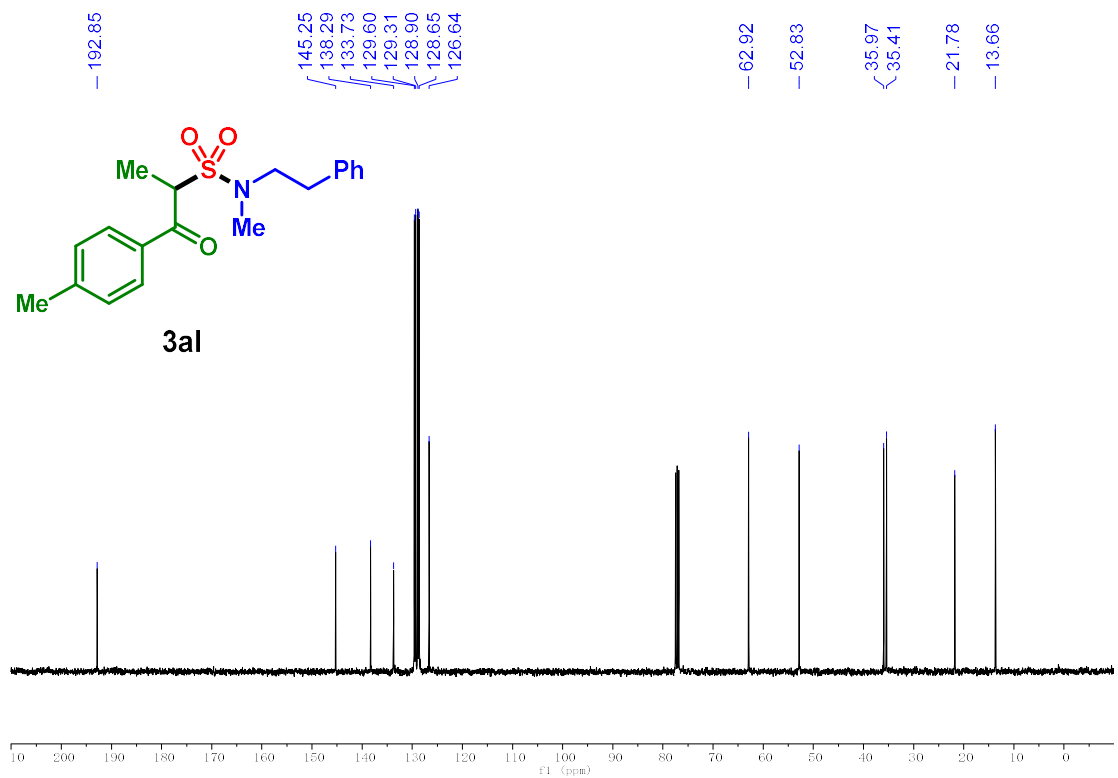

**N-methyl-N-(naphthalen-2-ylmethyl)-1-oxo-1-(p-tolyl)propane-2-sulfonamide (3am)**

$^1\text{H NMR}$  (400 MHz,  $\text{CDCl}_3$ )

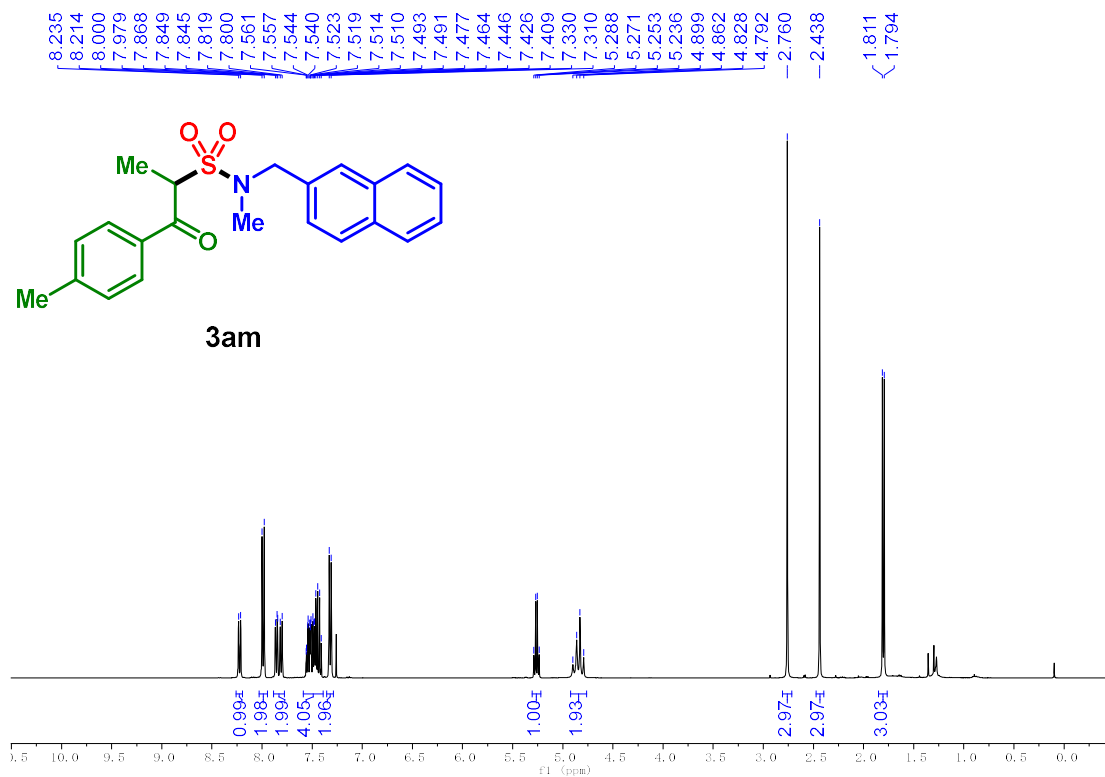

$^{13}\text{C NMR}$  (100 MHz,  $\text{CDCl}_3$ )

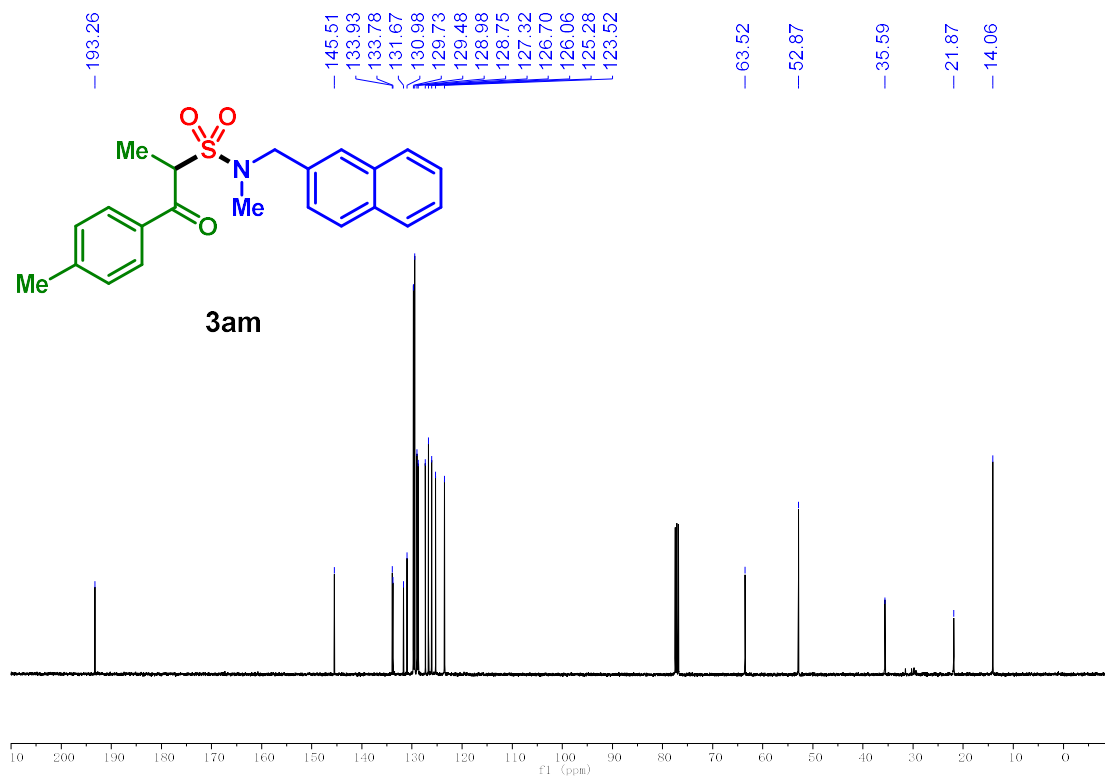

# N-(2-cyanoethyl)-N-methyl-1-oxo-1-(p-tolyl)propane-2-sulfonamide (3an)

$^1\text{H}$  NMR (400 MHz,  $\text{CDCl}_3$ )

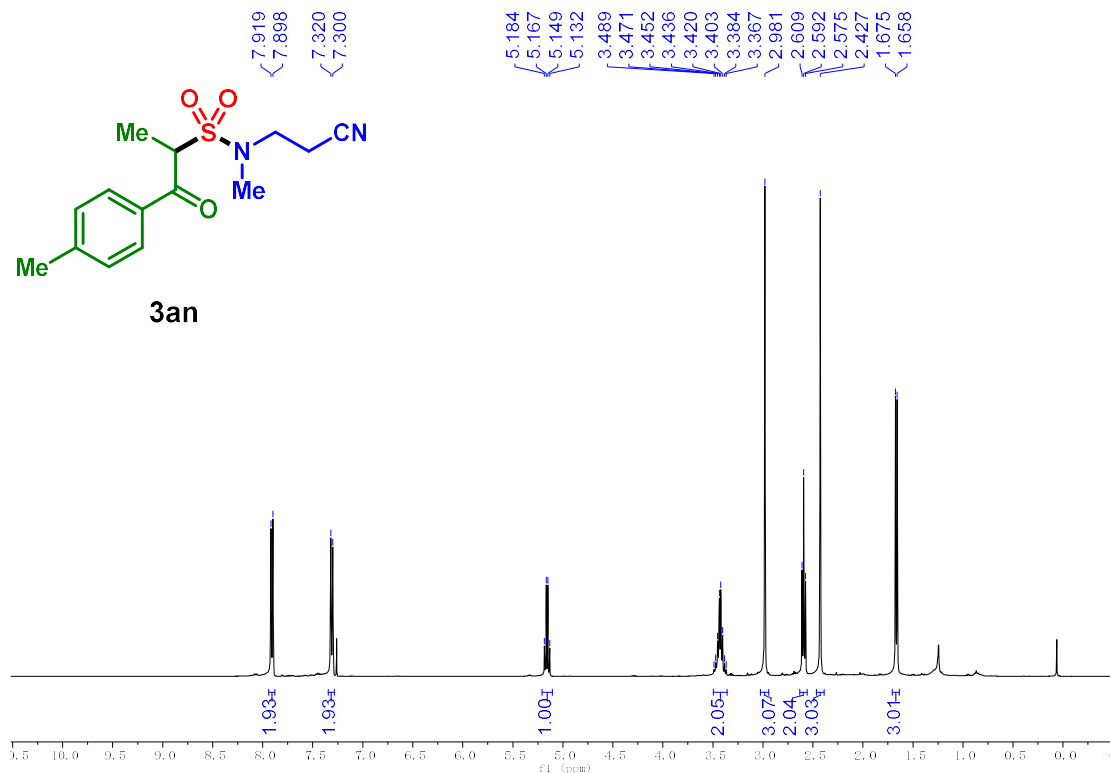

$^{13}\text{C}$  NMR (100 MHz,  $\text{CDCl}_3$ )

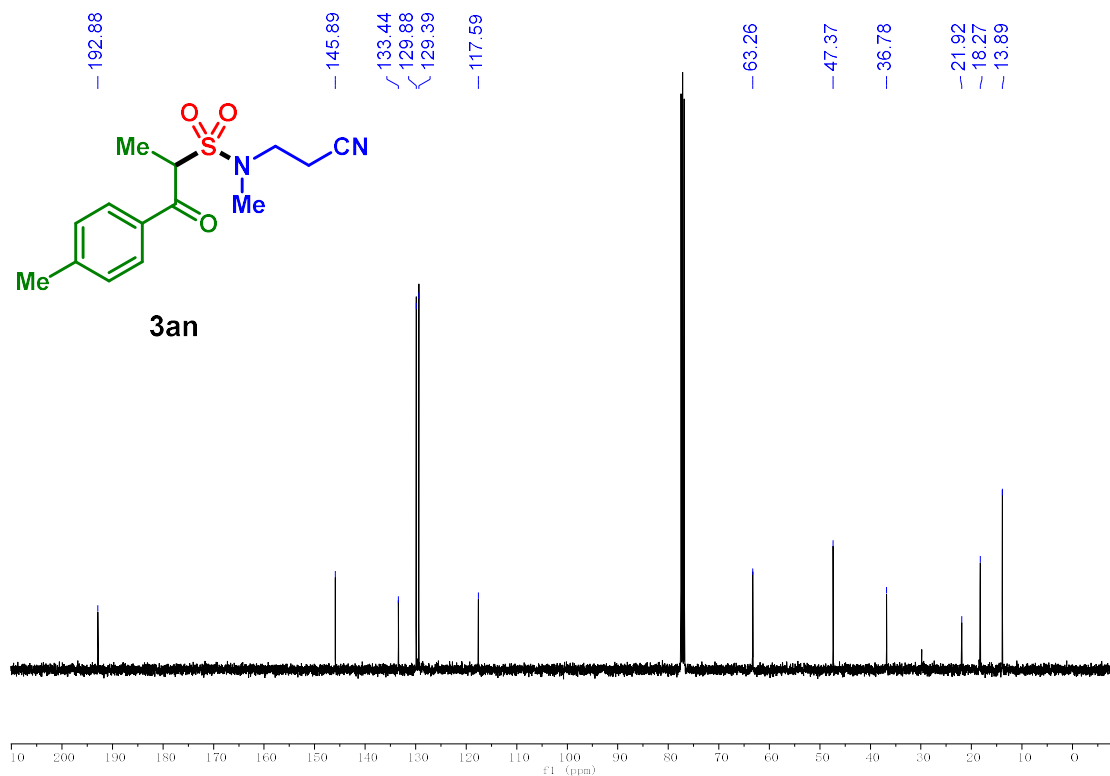

**N-(3-(10,11-dihydro-5H-dibenzo[a,d][7]annulen-5-ylidene)propyl)-N-methyl-1-oxo-1-(p-tolyl)propane-2-sulfonamide (3ao)**

$^1\text{H}$  NMR (400 MHz,  $\text{CDCl}_3$ )

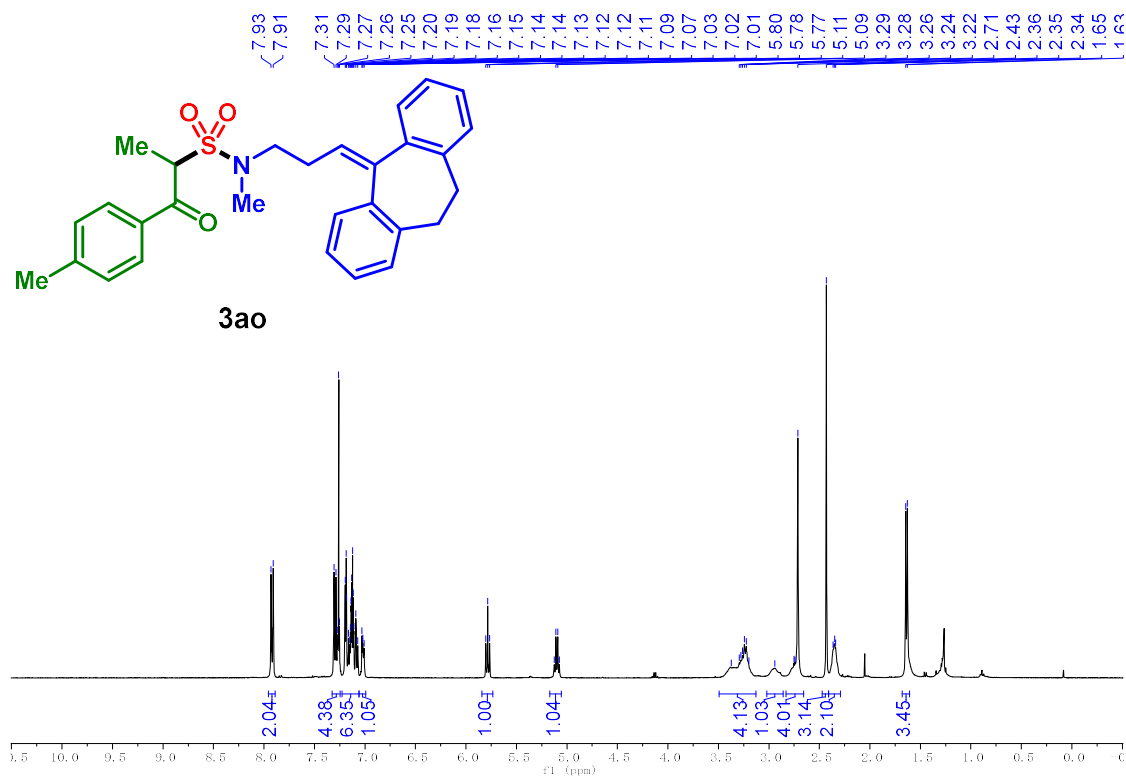

$^{13}\text{C}$  NMR (100 MHz,  $\text{CDCl}_3$ )

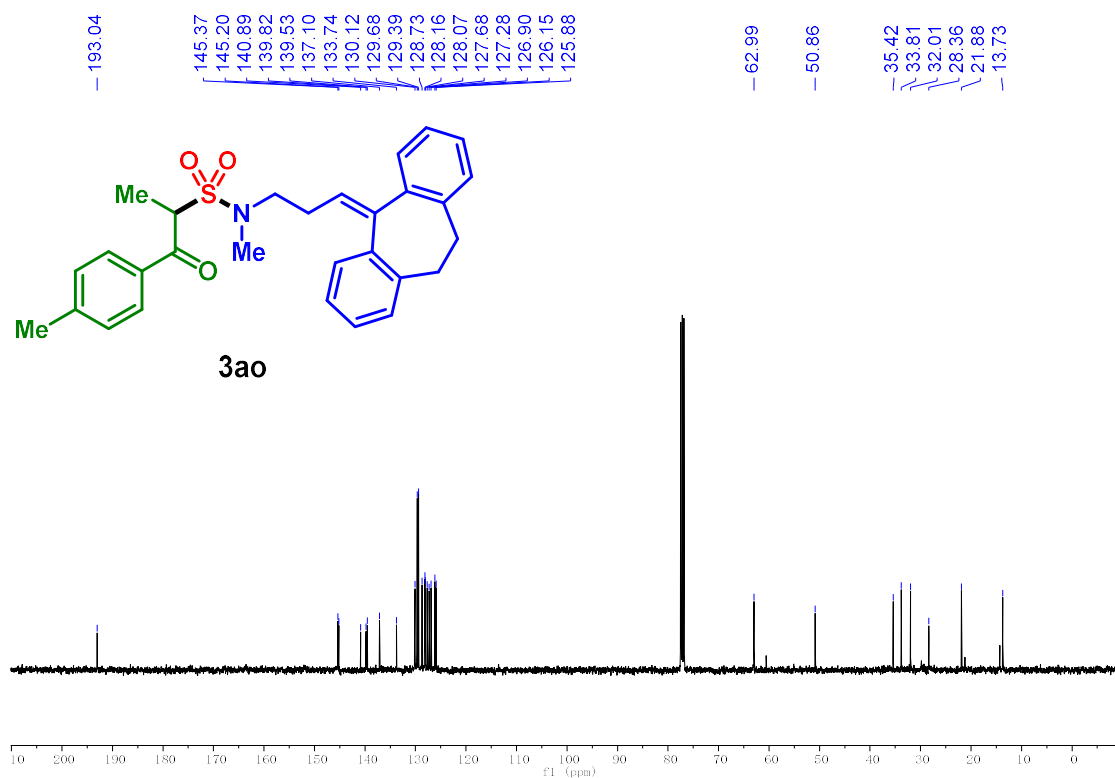



## 2-(morpholinosulfonyl)-1-(p-tolyl)propan-1-ol (4)

$^1\text{H}$  NMR (400 MHz,  $\text{CDCl}_3$ )

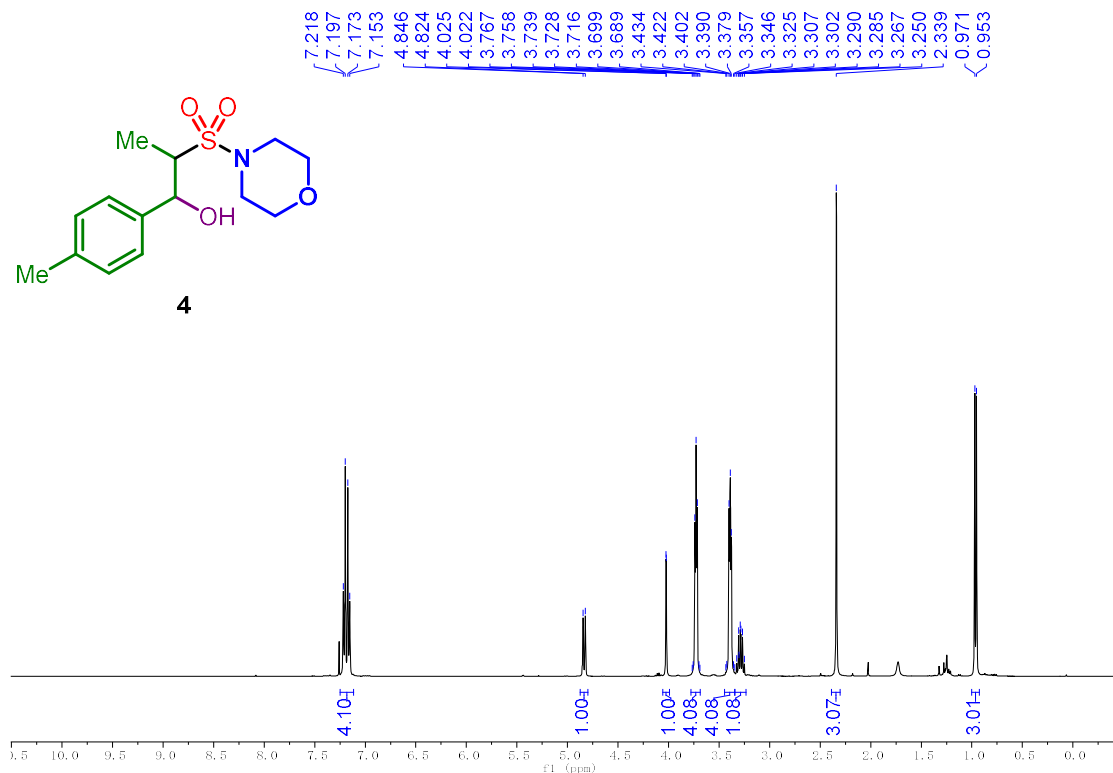

$^{13}\text{C}$  NMR (100 MHz,  $\text{CDCl}_3$ )

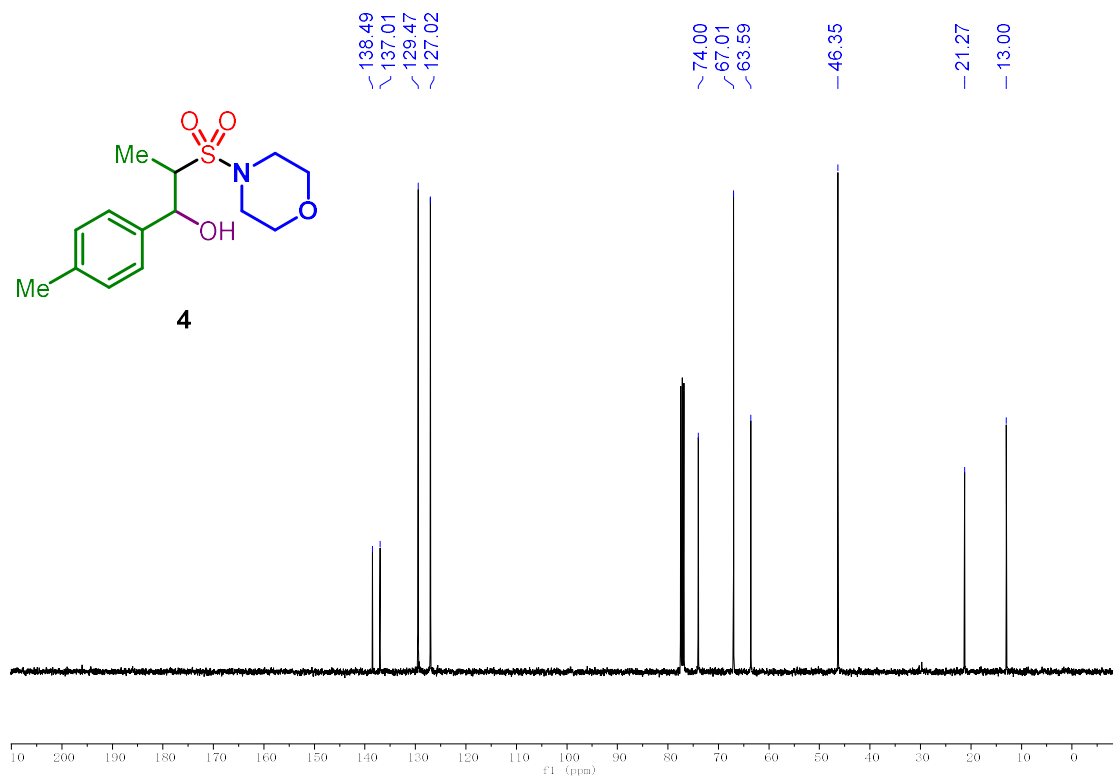

## 2-methyl-2-(morpholinosulfonyl)-1-(p-tolyl)pent-4-en-1-one (5)

$^1\text{H}$  NMR (400 MHz,  $\text{CDCl}_3$ )

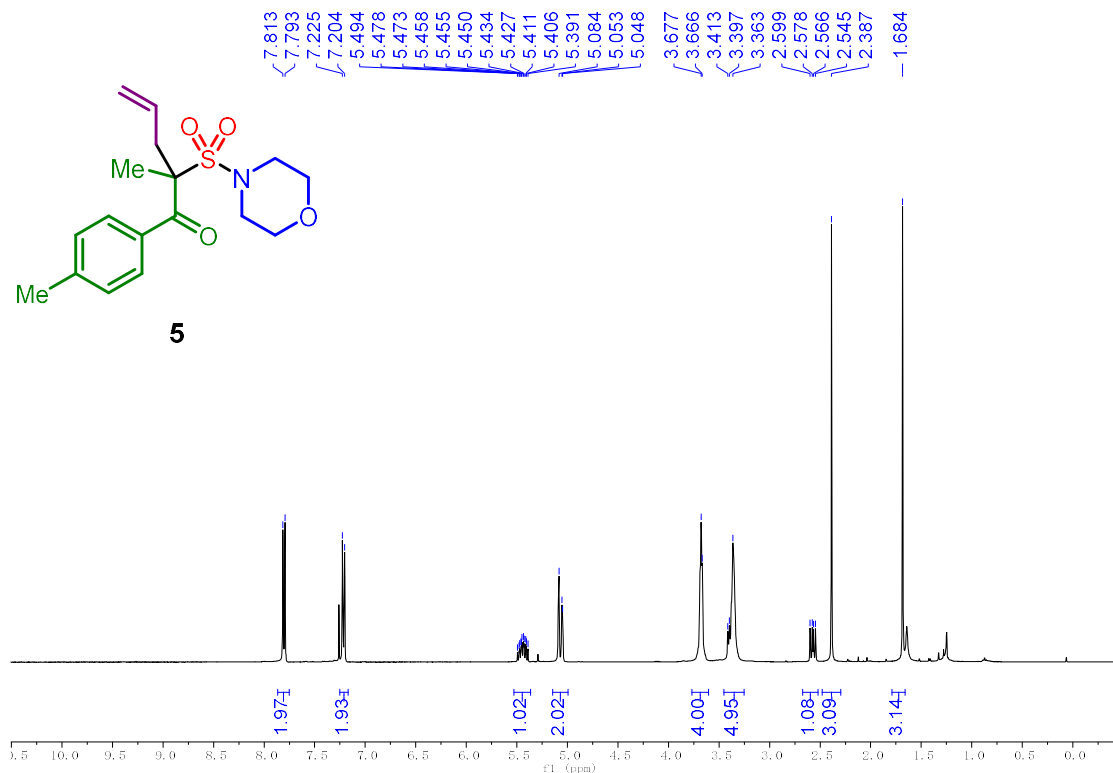

$^{13}\text{C}$  NMR (100 MHz,  $\text{CDCl}_3$ )

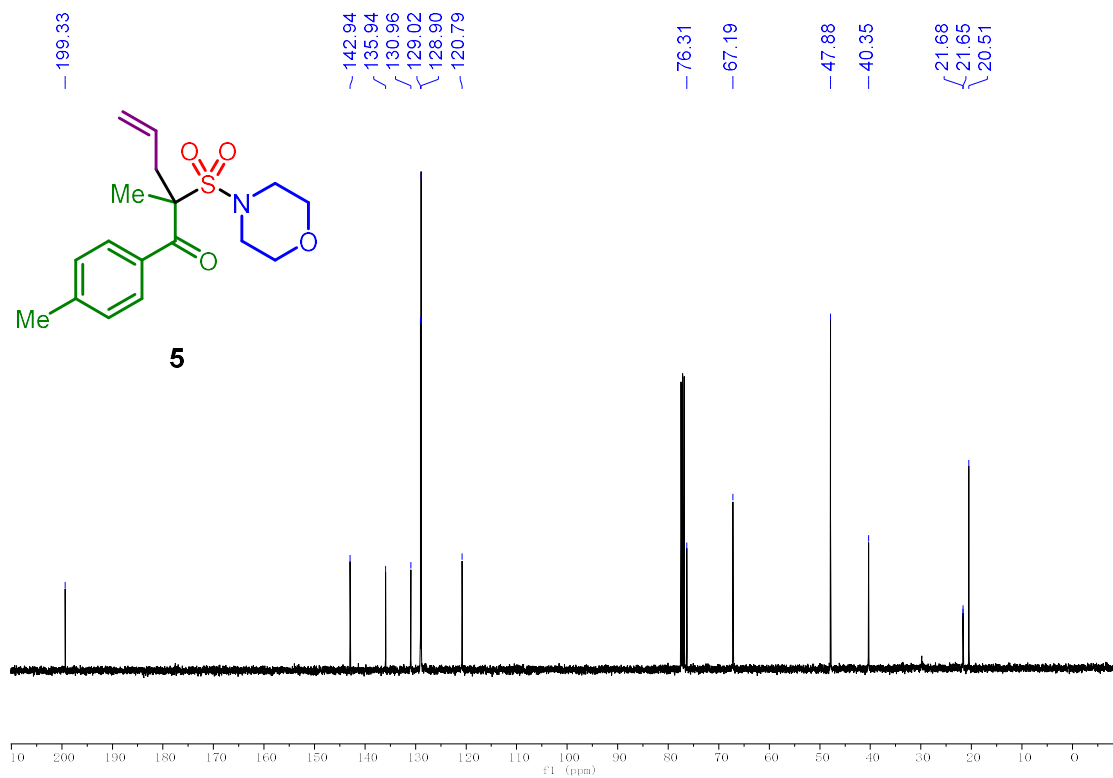

## 2-chloro-2-(morpholinofulfonyl)-1-(p-tolyl)propan-1-one (6a)

$^1\text{H}$  NMR (400 MHz,  $\text{CDCl}_3$ )

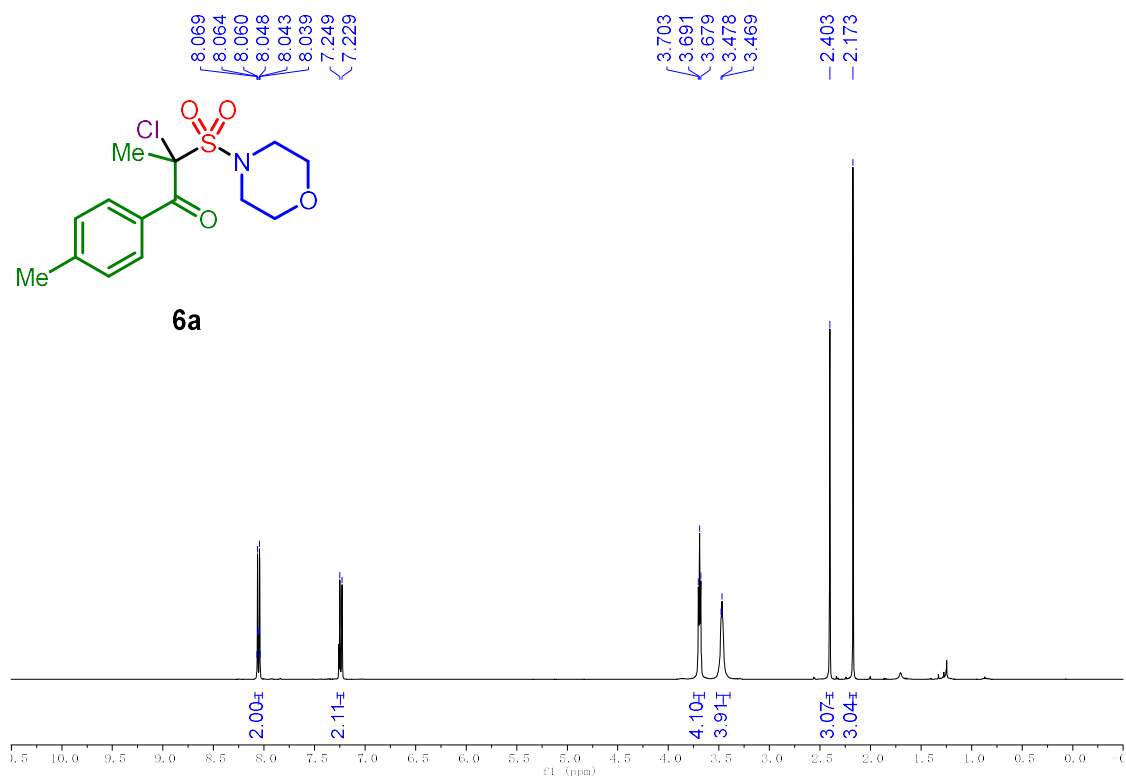

$^{13}\text{C}$  NMR (100 MHz,  $\text{CDCl}_3$ )

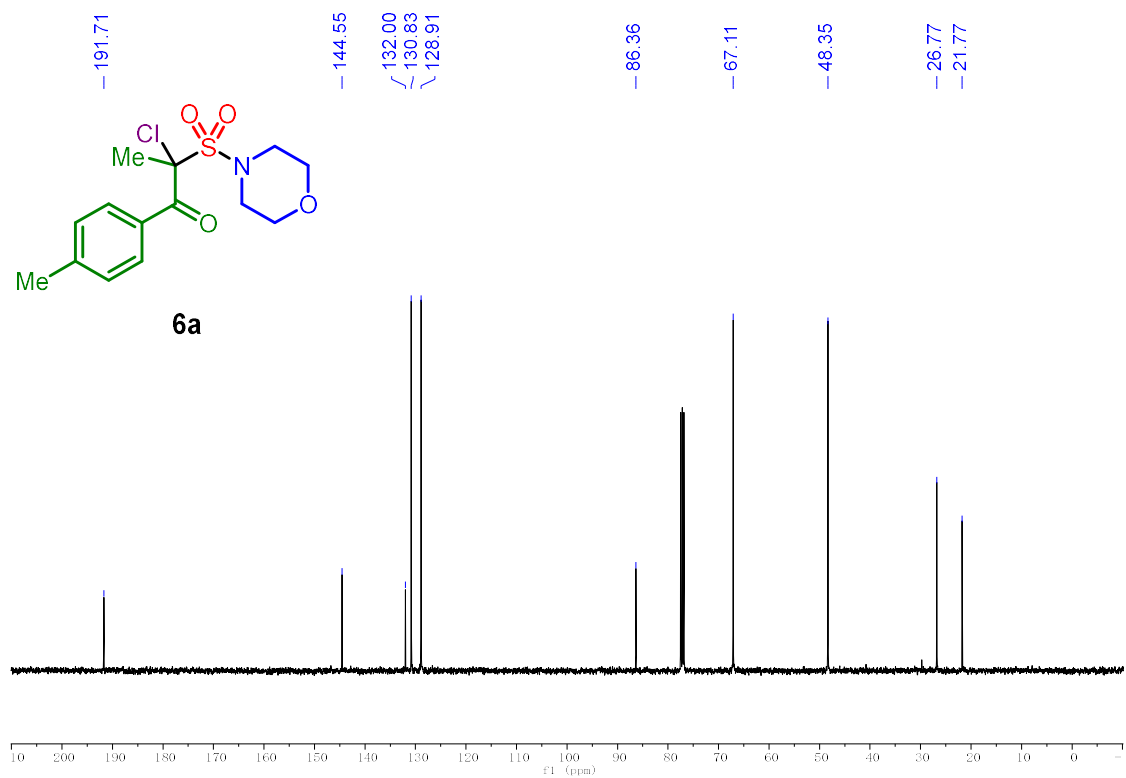

## 2-bromo-2-(morpholinosulfonyl)-1-(p-tolyl)propan-1-one (6b)

$^1\text{H}$  NMR (400 MHz,  $\text{CDCl}_3$ )

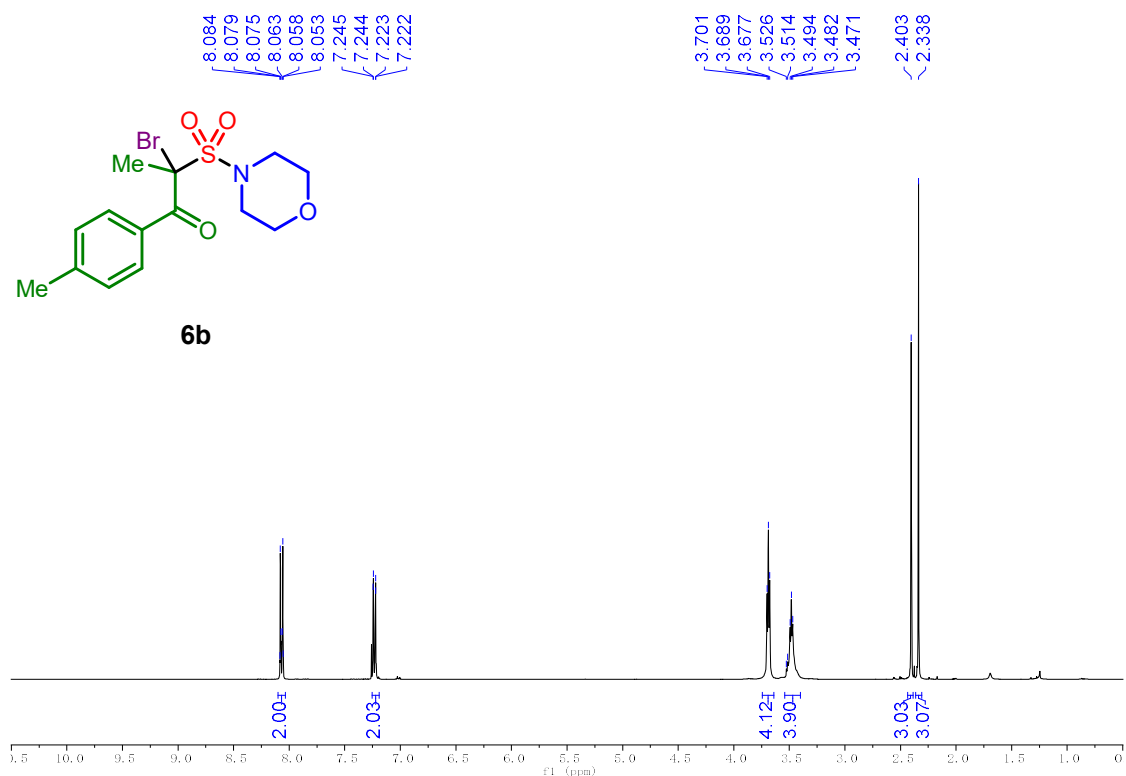

$^{13}\text{C}$  NMR (100 MHz,  $\text{CDCl}_3$ )

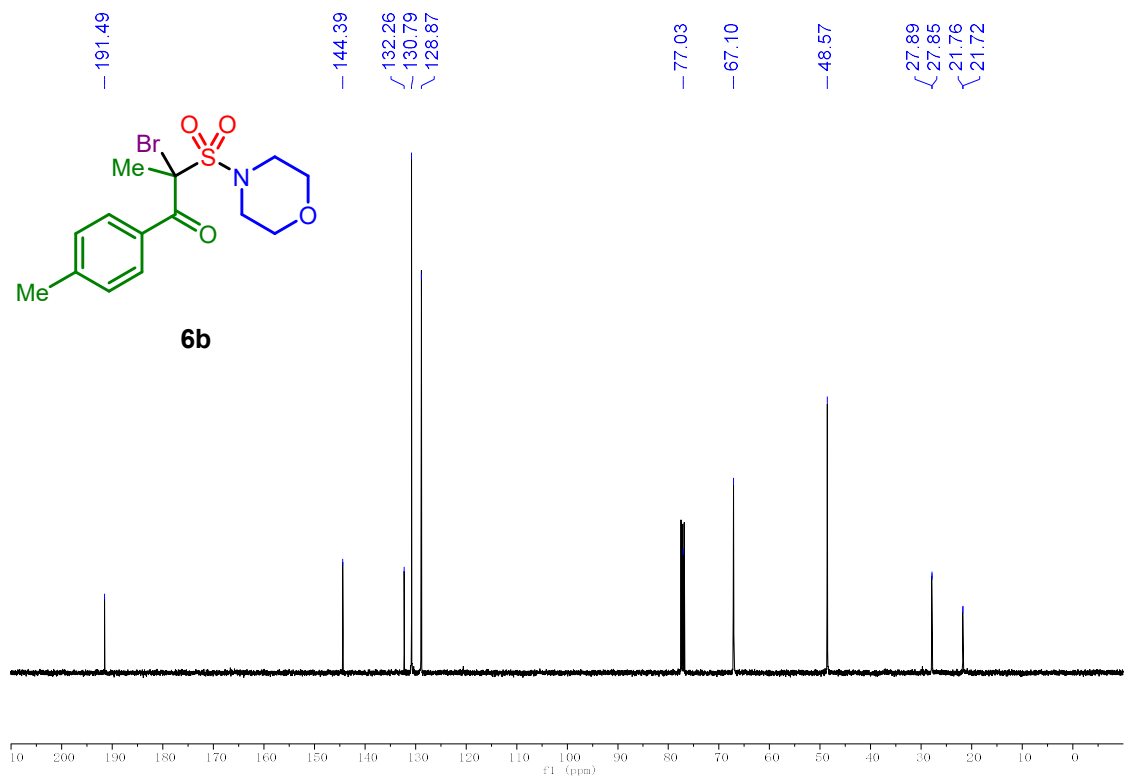

## 2-iodo-2-(morpholinosulfonyl)-1-(p-tolyl)propan-1-one (6c)

$^1\text{H}$  NMR (400 MHz,  $\text{CDCl}_3$ )

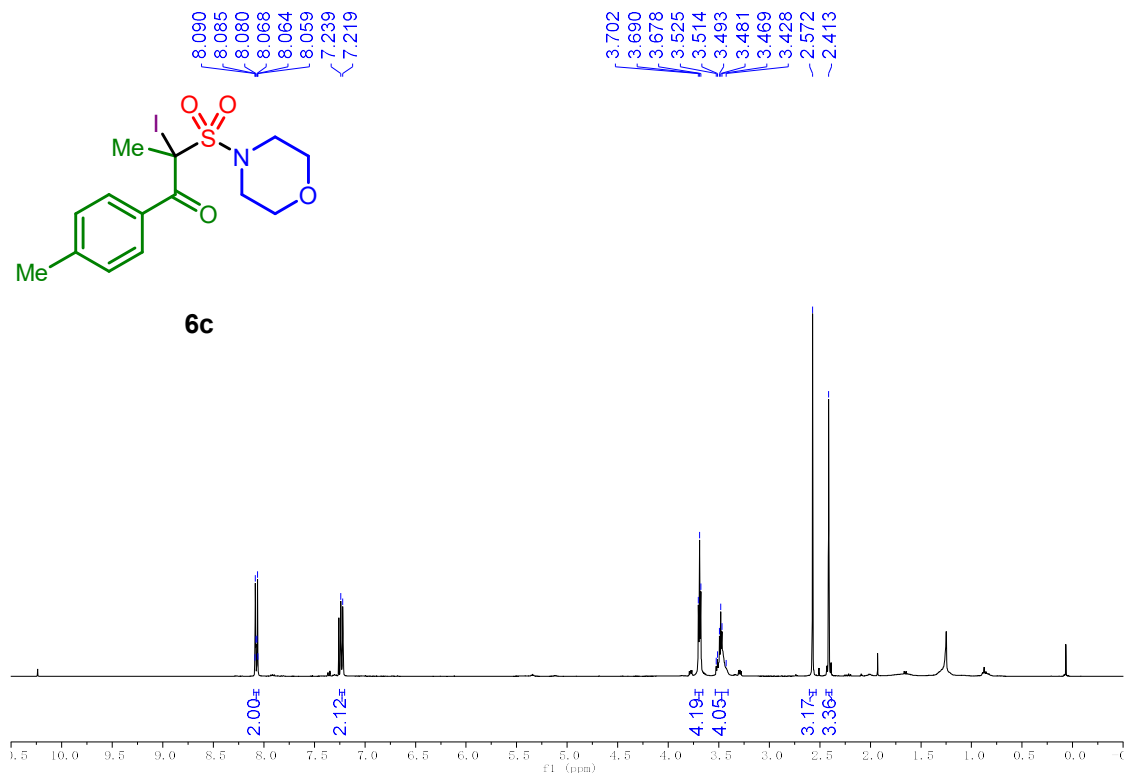

$^{13}\text{C}$  NMR (100 MHz,  $\text{CDCl}_3$ )

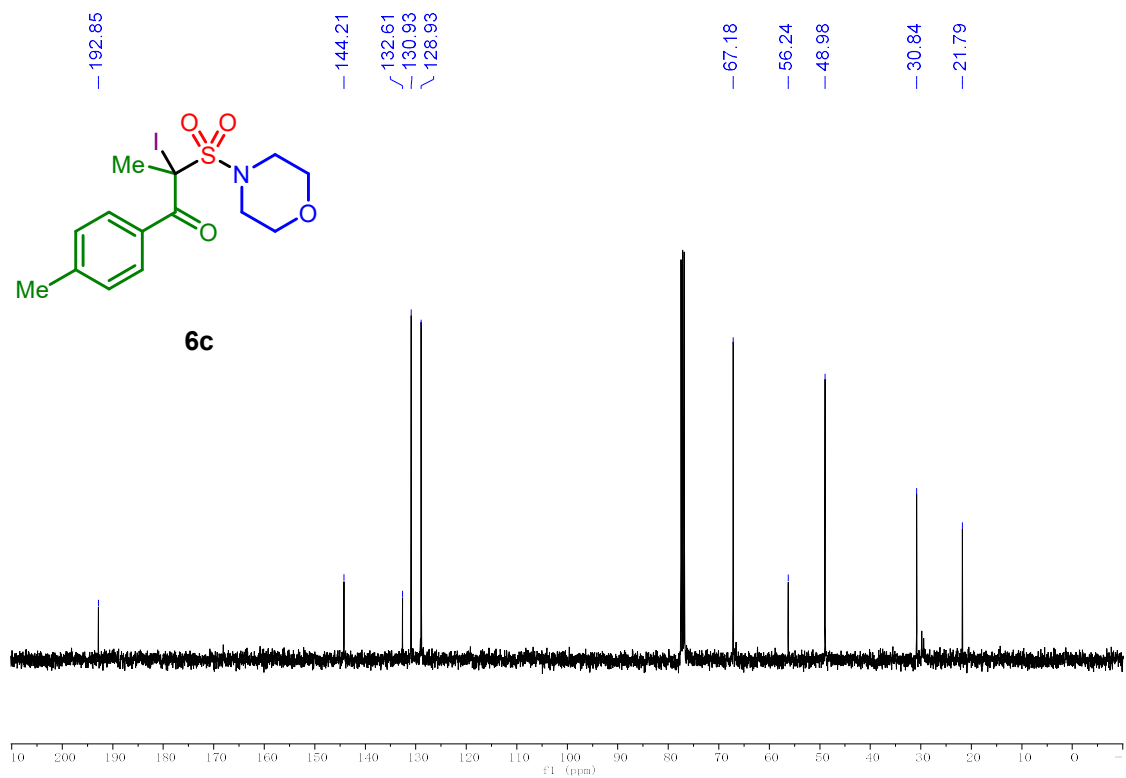

### 4-((phenylethynyl)sulfonyl)morpholine (7)

$^1\text{H}$  NMR (400 MHz,  $\text{CDCl}_3$ )

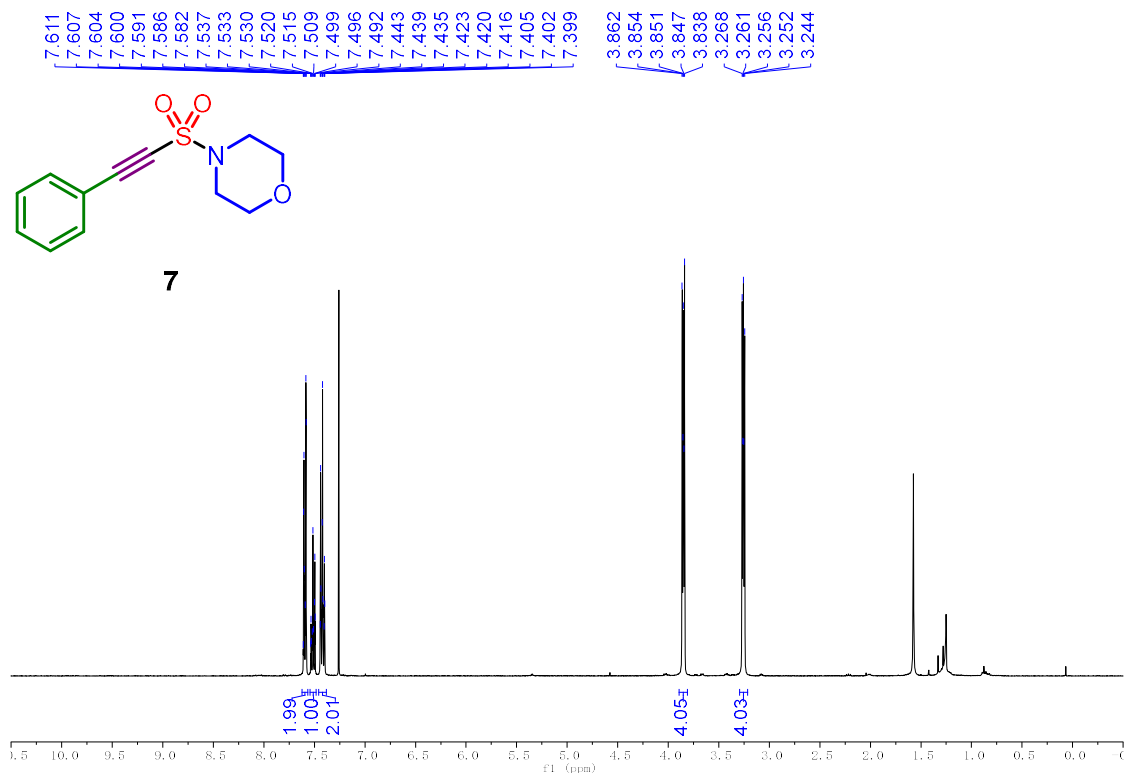

$^{13}\text{C}$  NMR (100 MHz,  $\text{CDCl}_3$ )

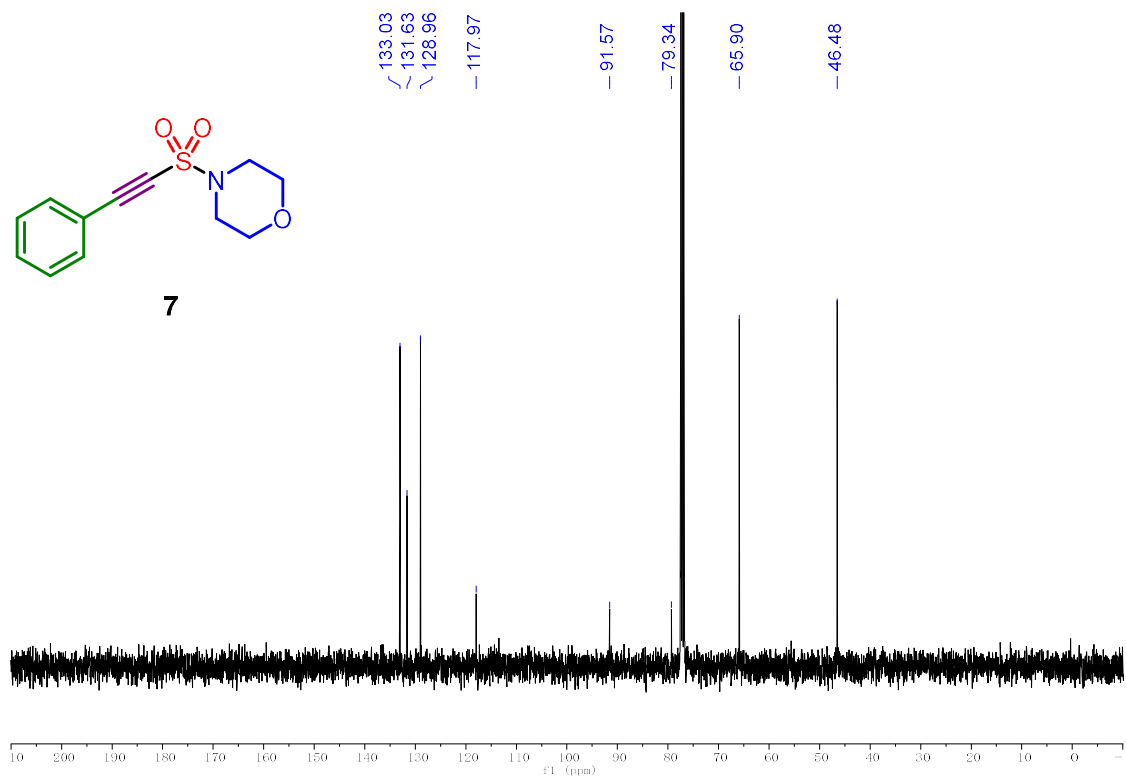

## 2-((2,2,6,6-tetramethylpiperidin-1-yl)oxy)-1-(p-tolyl)propan-1-one (8)

$^1\text{H}$  NMR (400 MHz,  $\text{CDCl}_3$ )

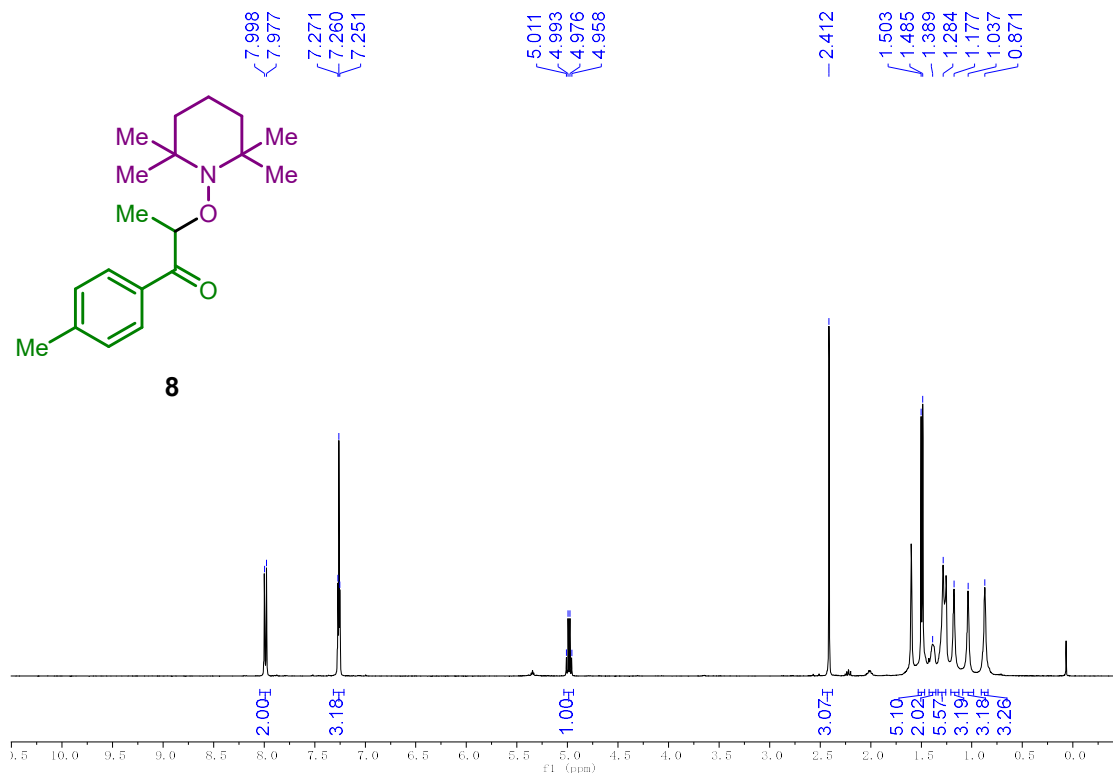

$^{13}\text{C}$  NMR (100 MHz,  $\text{CDCl}_3$ )

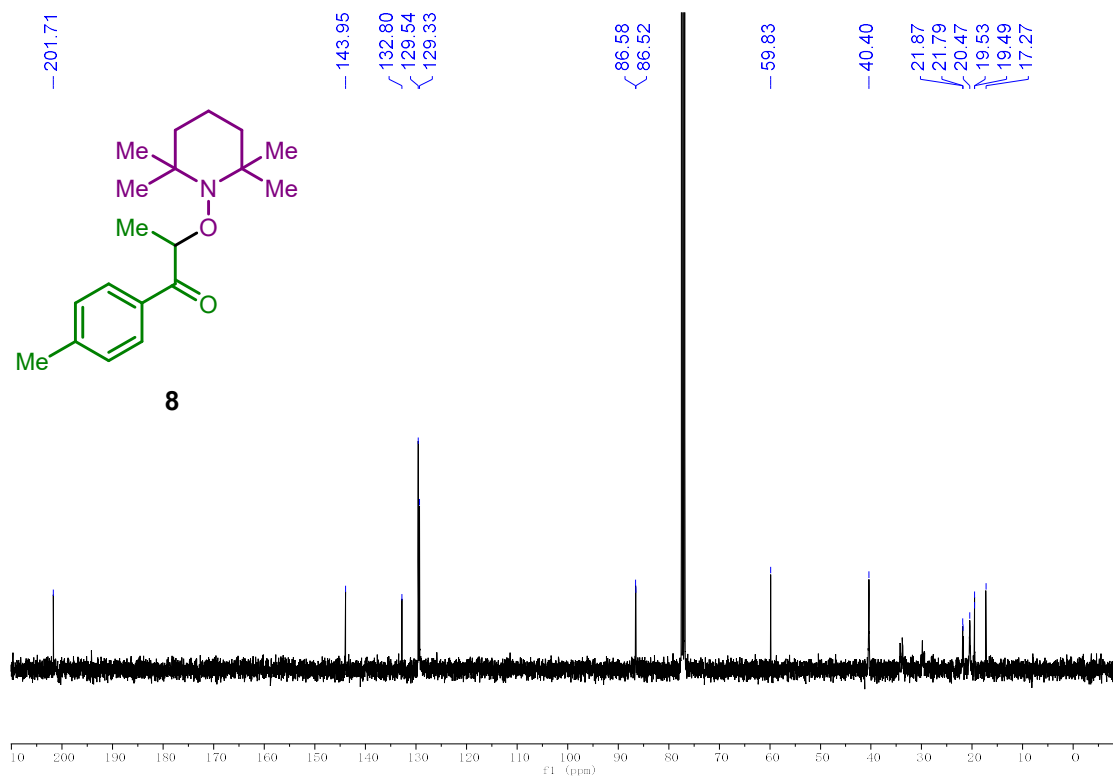

**2,6-di-tert-butyl-4-methyl-4-(1-oxo-1-(p-tolyl)propan-2-yl)cyclohexa-2,5-dien-1-one (9a)**

<sup>1</sup>H NMR (400 MHz, CDCl<sub>3</sub>)

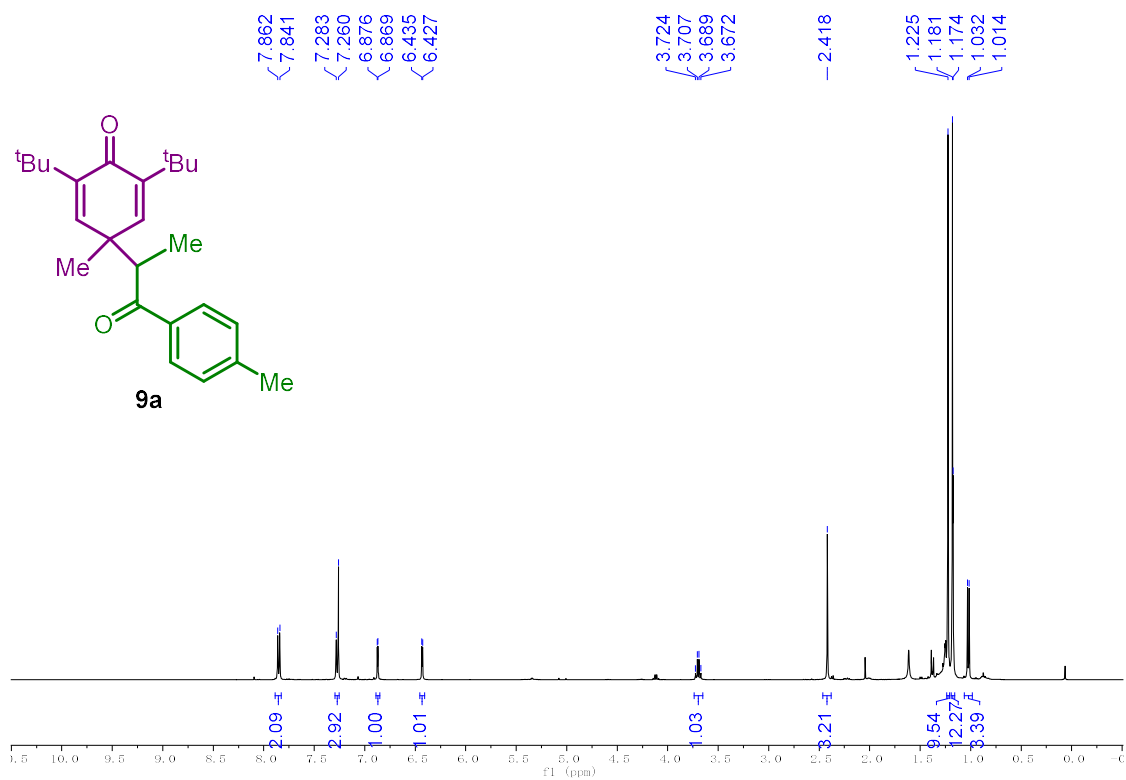

**2,6-di-tert-butyl-4-methyl-4-morpholinocyclohexa-2,5-dien-1-one (9b)**

<sup>1</sup>H NMR (400 MHz, CDCl<sub>3</sub>)

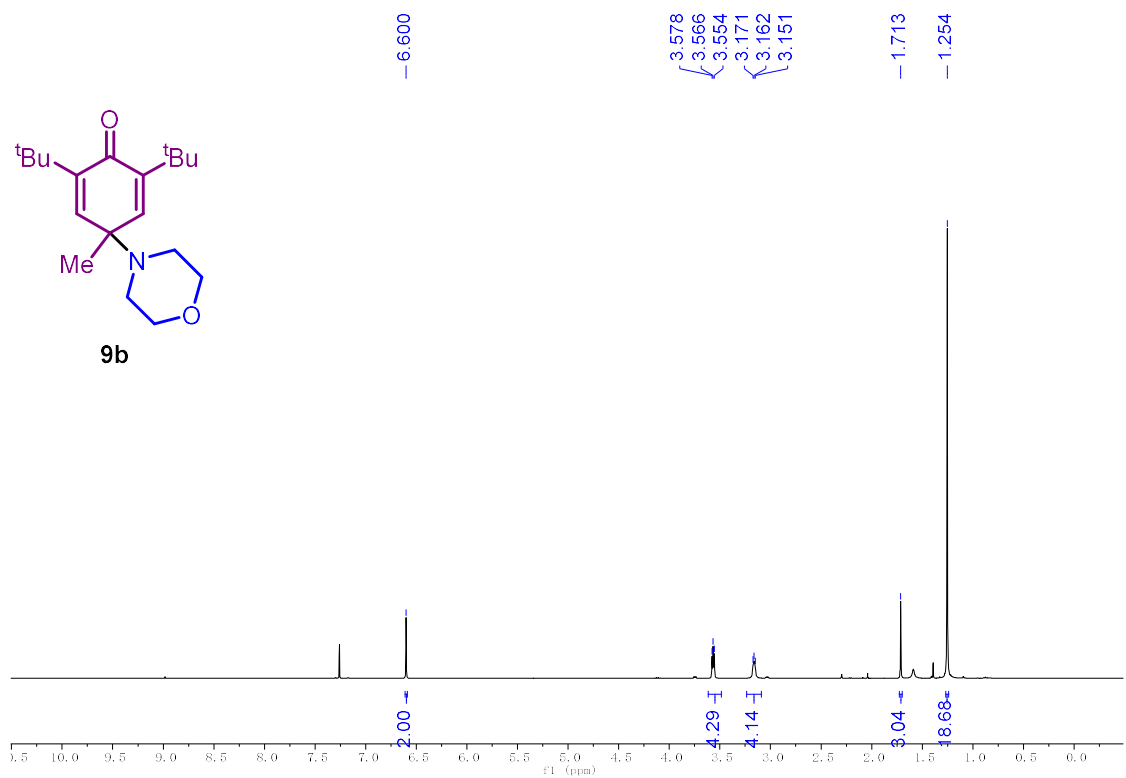



### 4-((2,2-diphenylvinyl)sulfonyl)morpholine (10)

<sup>1</sup>H NMR (400 MHz, CDCl<sub>3</sub>)

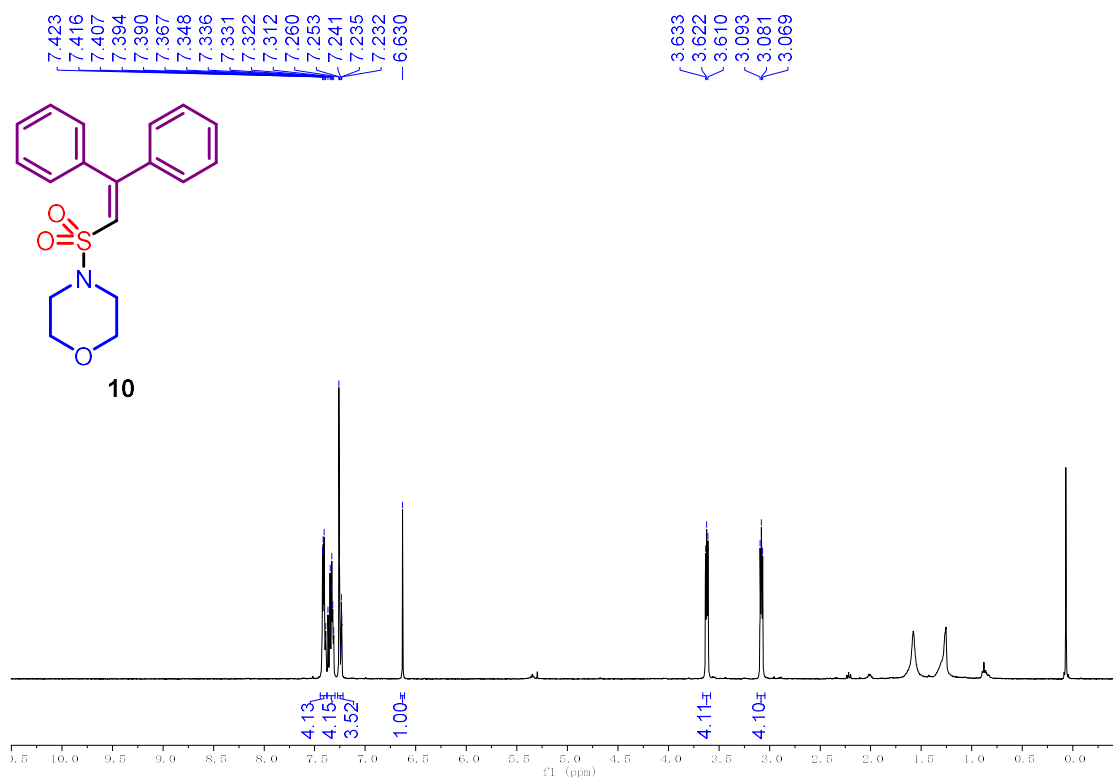

### (Z)-5-((1-cyclopropyl-2-oxo-2-phenylethyl)sulfonyl)-1-phenylpent-2-en-1-one (11)

<sup>1</sup>H NMR (400 MHz, CDCl<sub>3</sub>)

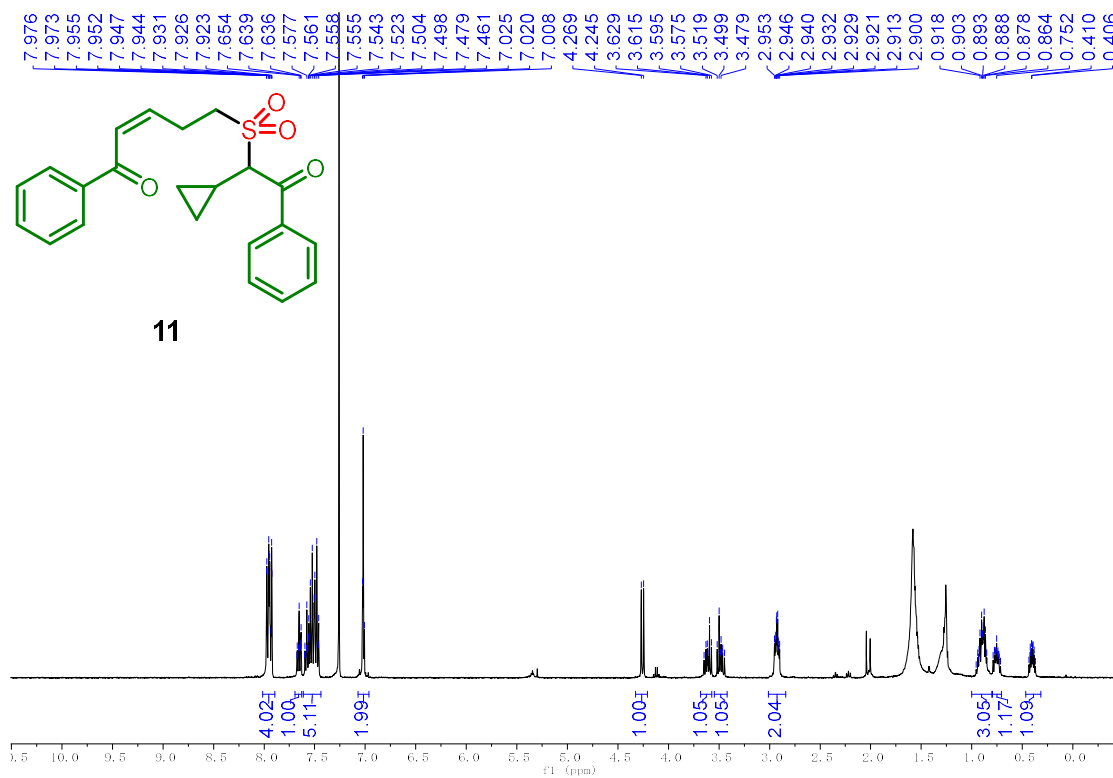

Supplement: d4qo00523f1.pdf [file d4qo00523f1.pdf]
